# Supplementary material for: Rhodium-catalysed tandem dehydrogenative coupling–Michael addition: direct synthesis of phthalides from benzoic acids and alkenes
Source: Royal Society of Chemistry journal article supplement (doi:10.1039/c6ra07671h), 2016-01-01

# Rhodium-catalysed Tandem Dehydrogenative Coupling–Michael addition: Direct Synthesis of Phthalides from Benzoic Acids and Alkenes

Andrea RENZETTI,<sup>\*a,b,c</sup> Hiroshi NAKAZAWA<sup>b</sup> and Chao-Jun LI<sup>\*c</sup>

[ar774@cam.ac.uk](mailto:ar774@cam.ac.uk)

Tel +44-1223-763929

[cj.li@mcgill.ca](mailto:cj.li@mcgill.ca)

Tel +1-514-398-8457

<sup>a</sup> *Department of Chemistry, University of Cambridge,  
Lensfield Road, Cambridge CB2 1EW, UK.*

<sup>b</sup> *Department of Chemistry, Graduate School of Science, Osaka City University  
Sumiyoshi-ku, Osaka 558-8585, Japan.*

<sup>c</sup> *Department of Chemistry, McGill University  
801 Sherbrooke Street West, H3A 0B8 Montreal, QC, Canada.*

## Supplementary Information

### Contents

|                                                                           |      |
|---------------------------------------------------------------------------|------|
| 1. General remarks                                                        | S-2  |
| 2. General procedure                                                      | S-2  |
| 3. Characterisation data of products                                      | S-3  |
| 4. Preparation of <b>7</b>                                                | S-14 |
| 5. Conversion of <b>7</b> into <b>4a</b>                                  | S-15 |
| 6. Conversion of <b>7</b> into <b>4a</b> and <b>4b</b>                    | S-15 |
| 7. X-ray crystal structure determination of <b>(COD)<sub>2</sub>RhOTf</b> | S-17 |
| 8. References                                                             | S-20 |
| 9. NMR spectra of products                                                | S-21 |
| 10. HRMS spectra of products                                              | S-69 |

## 1. General remarks

Reagents were purchased from commercial suppliers and used as received. Solid reagents were weighed on a semi-micro balance featuring one hundredth of a milligram precision. Solvents were dried by standard techniques. Melting points were measured on a hot-stage Reichert Thermovar apparatus and are uncorrected.  $^1\text{H}$  and  $^{13}\text{C}\{^1\text{H}\}$  NMR spectra were recorded on a Varian instrument at 300, 400, or 500 MHz and 75, 100, or 125 MHz, respectively. IR spectra were measured on KBr pastille. High resolution mass spectra (HRMS) were obtained on a sector-field mass spectrometer. Elemental analyses were performed on a FISON Instrument EA 108 or a Perkin Elmer 240C elemental analyser.

## 2. General procedure

A mixture of  $[(\text{COD})\text{RhCl}]_2$  (11.82 mg, 0.024 mmol, 8 mol%) and AgOTf (18.54 mg, 0.072 mmol, 24 mol%) in chlorobenzene (600  $\mu\text{L}$ ) was stirred in a glass tube at room temperature for 30 minutes. Dicyclopentadiene (13.0  $\mu\text{L}$ , 0.096 mmol, 32 mol%) was added. Mixture turned instantaneously from light yellow to dark orange. Then, substituted benzoic acid (0.3 mmol, 1.0 equiv), alkene (0.6 mmol, 2.0 equiv),  $\text{Cu}(\text{OAc})_2 \cdot \text{H}_2\text{O}$  (239.7 mg, 1.2 mmol, 4.0 equiv), and chlorobenzene (900  $\mu\text{L}$ ) were added. The tube was sealed and heated at 120  $^\circ\text{C}$  for 48 hours. After this time the reaction mixture was filtered through a short pad of silica gel and eluted with ethyl acetate. The filtrate was concentrated under reduced pressure. Purification of the crude mixture by flash chromatography, preparative thin-layer chromatography (PTLC), or recrystallisation afforded the pure product.

### 3. Characterisation data of products

#### 4,5,6-Trimethoxy-3-(2-oxobutyl)isobenzofuran-1(3H)-one (1a)

White solid (82 mg, 93% yield); prepared following the general procedure from 3,4,5-trimethoxybenzoic acid (63.6 mg, 0.3 mmol) and ethyl vinyl ketone (61.6  $\mu\text{L}$ , 0.6 mmol); purified by recrystallisation (hexane/diethyl ether = 1:1); mp = 124–125 °C.  $^1\text{H}$  NMR ( $\text{CDCl}_3$ , 300 MHz):  $\delta$  1.10 (t, 3H,  $J = 7.5$  Hz), 2.53 (q, 2H,  $J = 7.5$  Hz), 2.74 (dd, 1H,  $J = 16.5$  Hz,  $J = 9.0$  Hz), 3.16 (dd, 1H,  $J = 16.5$  Hz,  $J = 3.0$  Hz), 3.91 (s, 3H), 3.93 (s, 3H), 3.96 (s, 3H), 5.91 (dd, 1H,  $J = 9.0$  Hz,  $J = 3.0$  Hz), 7.12 (s, 1H).  $^{13}\text{C}$  NMR ( $\text{CDCl}_3$ , 75 MHz):  $\delta$  7.6, 37.0, 45.6, 56.4, 61.1, 61.4, 75.7, 102.8, 121.3, 134.6, 147.0, 147.5, 156.0, 170.1, 207.0. IR (KBr):  $\nu$  2940, 1765, 1717, 1479, 1420, 1342, 1110. HRMS (ESI):  $m/z$  calcd for  $\text{C}_{15}\text{H}_{19}\text{O}_6$   $[\text{M} + \text{H}]^+$  295.1176, found 295.1178.

#### 5,6,7-Trimethoxy-3-(2-oxobutyl)isobenzofuran-1(3H)-one (1b)

White solid (35 mg, 40% yield); prepared following the general procedure from 2,3,4-trimethoxybenzoic acid (63.6 mg, 0.3 mmol) and ethyl vinyl ketone (61.6  $\mu\text{L}$ , 0.6 mmol); purified by PTLC (hexane/diethyl ether = 1:1); mp = 122–123 °C.  $^1\text{H}$  NMR ( $\text{CDCl}_3$ , 400 MHz):  $\delta$  1.11 (t, 3H,  $J = 7.2$  Hz), 2.49 (dq, 1H,  $J = 18.0$  Hz,  $J = 7.2$  Hz), 2.57 (dq, 1H,  $J = 18.0$  Hz,  $J = 7.2$  Hz), 2.82 (dd, 1H,  $J = 17.2$  Hz,  $J = 6.8$  Hz), 3.10 (dd, 1H,  $J = 17.2$  Hz,  $J = 6.8$  Hz), 3.86 (s, 3H), 3.92 (s, 3H), 4.13 (s, 3H), 5.76 (t, 1H,  $J = 6.8$  Hz), 6.66 (s, 1H).  $^{13}\text{C}$  NMR ( $\text{CDCl}_3$ , 75 MHz):  $\delta$  7.5, 36.9, 47.3, 56.5, 61.4, 62.4, 75.5, 99.8, 110.3, 142.0, 147.4, 152.3, 159.7, 167.6, 207.8. IR (KBr):  $\nu$  2975, 1737, 1599, 1474, 1418, 1346, 1249, 1196. HRMS (ESI):  $m/z$  calcd for  $\text{C}_{15}\text{H}_{19}\text{O}_6$   $[\text{M} + \text{H}]^+$  295.11761, found 295.11778.

### **5,6,7-tris(Benzyloxy)-3-(2-oxobutyl)isobenzofuran-1(3H)-one (1c)**

Incolor liquid (118 mg, 75%); prepared following the general procedure from 3,4,5-tris(benzyloxy)benzoic acid (133.5 mg, 0.3 mmol) and ethyl vinyl ketone (61.6  $\mu$ L, 0.6 mmol) using 3.0 mL of solvent; purified by flash chromatography (hexane/diethyl ether = 1:1);  $^1\text{H}$  NMR ( $\text{CDCl}_3$ , 400 MHz):  $\delta$  1.03 (t, 3H,  $J = 7.2$  Hz), 2.40 (q, 2H,  $J = 7.2$  Hz), 2.58 (dd, 1H,  $J = 16.8$  Hz,  $J = 9.2$  Hz), 3.05 (dd, 1H,  $J = 16.8$  Hz,  $J = 2.8$  Hz), 5.15 (m, 6H), 5.51 (dd, 1H,  $J = 9.2$  Hz,  $J = 2.8$  Hz), 7.23-7.47 (m, 16H).  $^{13}\text{C}$  NMR ( $\text{CDCl}_3$ , 75 MHz):  $\delta$  7.4, 36.8, 45.1, 71.3, 75.5, 75.6, 75.7, 104.6, 118.2, 121.3, 127.7, 128.4, 128.4, 128.5, 128.6, 128.7, 128.7, 135.5, 135.8, 136.4, 136.6, 146.6, 155.0, 169.8, 206.6. IR (KBr):  $\nu$  3065, 2976, 1762, 1717, 1471, 1451, 1339, 1103. HRMS (ESI):  $m/z$  calcd for  $\text{C}_{33}\text{H}_{30}\text{NaO}_6$   $[\text{M} + \text{Na}]^+$  545.1935, found 545.1937.

### **5-Methoxy-3-(2-oxobutyl)isobenzofuran-1(3H)-one (1d)**

White solid (22 mg, 31% yield); prepared following the general procedure from 4-methoxybenzoic acid (46.2 mg, 0.3 mmol) and ethyl vinyl ketone (61.6  $\mu$ L, 0.6 mmol); purified by PTLC (hexane/diethyl ether = 1:1); mp = 70–71  $^\circ\text{C}$ .  $^1\text{H}$  NMR ( $\text{CDCl}_3$ , 400 MHz):  $\delta$  1.11 (t, 3H,  $J = 7.2$  Hz), 2.49 (dq, 1H,  $J = 18.0$  Hz,  $J = 7.2$  Hz), 2.58 (dq, 1H,  $J = 18.0$  Hz,  $J = 7.2$  Hz), 2.85 (dd, 1H,  $J = 17.2$  Hz,  $J = 6.4$  Hz), 3.11 (dd, 1H,  $J = 17.2$  Hz,  $J = 6.4$  Hz), 3.88 (s, 3H), 5.86 (t, 1H,  $J = 6.4$  Hz), 6.89 (d, 1H,  $J = 2.0$  Hz), 7.04 (dd, 1H,  $J = 8.4$  Hz,  $J = 2.0$  Hz), 7.79 (d, 1H,  $J = 8.4$  Hz).  $^{13}\text{C}$  NMR ( $\text{CDCl}_3$ , 75 MHz):  $\delta$  7.5, 36.8, 47.0, 55.9, 76.2, 106.3, 116.8, 118.0, 127.2, 152.3, 164.8, 169.8, 207.5. IR (KBr):  $\nu$  2977, 1758, 1715, 1607, 1492, 1289, 1053. HRMS (ESI):  $m/z$  calcd for  $\text{C}_{13}\text{H}_{14}\text{NaO}_4$   $[\text{M} + \text{Na}]^+$  257.0784, found 257.0784.

### 5-Methyl-3-(2-oxobutyl)isobenzofuran-1(3H)-one (1e)

White solid (28 mg, 43% yield); prepared following the general procedure from *p*-toluic acid (41.7 mg, 0.3 mmol) and ethyl vinyl ketone (61.6  $\mu$ L, 0.6 mmol); purified by PTLC (hexane/diethyl ether = 1:1); mp = 76–77 °C.  $^1\text{H}$  NMR ( $\text{CDCl}_3$ , 400 MHz):  $\delta$  1.11 (t, 3H,  $J$  = 7.2 Hz), 2.47 (s, 1H), 2.49 (dq, 1H,  $J$  = 18.0 Hz,  $J$  = 7.2 Hz), 2.57 (dq, 1H,  $J$  = 18.0 Hz,  $J$  = 7.2 Hz), 2.86 (dd, 1H,  $J$  = 17.2 Hz,  $J$  = 6.4 Hz), 3.08 (dd, 1H,  $J$  = 17.2 Hz,  $J$  = 6.8 Hz), 5.89 (t, 1H,  $J$  = 6.8 Hz), 7.24 (dd, 1H,  $J$  = 1.2 Hz,  $J$  = 0.8 Hz), 7.33 (ddd, 1H,  $J$  = 7.6 Hz,  $J$  = 1.2 Hz,  $J$  = 0.8 Hz), 7.77 (d, 1H,  $J$  = 7.6 Hz).  $^{13}\text{C}$  NMR ( $\text{CDCl}_3$ , 75 MHz):  $\delta$  7.5, 22.1, 36.8, 47.0, 76.6, 122.6, 123.2, 125.5, 130.6, 145.6, 150.0, 170.1, 207.4. IR (KBr):  $\nu$  2980, 1761, 1716, 1616, 1340, 1280, 1052. HRMS (ESI):  $m/z$  calcd for  $\text{C}_{13}\text{H}_{14}\text{NaO}_3$  [ $\text{M} + \text{Na}$ ] $^+$  241.0835, found 241.0834.

### 3-(2-Oxobutyl)naphtho[1,2-*c*]furan-1(3H)-one (1f)

White solid (40 mg, 52% yield); prepared following the general procedure from  $\alpha$ -naphthoic acid (52.8 mg, 0.3 mmol) and ethyl vinyl ketone (61.6  $\mu$ L, 0.6 mmol); purified by flash chromatography (hexane/diethyl ether = 1:1); mp = 144–145 °C.  $^1\text{H}$  NMR ( $\text{CDCl}_3$ , 400 MHz):  $\delta$  1.13 (t, 3H,  $J$  = 7.6 Hz), 2.52 (dq, 1H,  $J$  = 18.0 Hz,  $J$  = 7.6 Hz), 2.60 (dq, 1H,  $J$  = 18.0 Hz,  $J$  = 7.6 Hz), 2.94 (dd, 1H,  $J$  = 16.8 Hz,  $J$  = 6.0 Hz), 3.12 (dd, 1H,  $J$  = 16.8 Hz,  $J$  = 6.8 Hz), 6.03 (t, 1H,  $J$  = 6.8 Hz), 7.50 (d, 1H,  $J$  = 8.8 Hz), 7.64 (dd, 1H,  $J$  = 8.0 Hz,  $J$  = 1.2 Hz), 7.72 (dd, 1H,  $J$  = 8.0 Hz,  $J$  = 1.2 Hz), 7.97 (d, 1H,  $J$  = 8.4 Hz), 8.13 (d, 1H,  $J$  = 8.8 Hz), 9.00 (d, 1H,  $J$  = 8.4 Hz).  $^{13}\text{C}$  NMR ( $\text{CDCl}_3$ , 100 MHz):  $\delta$  7.5, 37.0, 46.8, 76.2, 118.7, 120.0, 123.6, 127.5, 128.4, 129.1, 129.2, 133.5, 135.7, 151.2, 170.3, 207.3. IR (KBr):  $\nu$  3058, 2977, 1748, 1716, 1519, 1331. HRMS (ESI):  $m/z$  calcd for  $\text{C}_{16}\text{H}_{14}\text{NaO}_3$  [ $\text{M} + \text{Na}$ ] $^+$  277.0835, found 277.0842.

### **3-(2-Oxobutyl)isobenzofuran-1(3H)-one (1g)<sup>1</sup>**

White solid (30 mg, 49% yield); prepared following the general procedure from benzoic acid (36.9 mg, 0.3 mmol) and ethyl vinyl ketone (61.6  $\mu$ L, 0.6 mmol); purified by flash chromatography (hexane/diethyl ether = 1:1). <sup>1</sup>H NMR (CDCl<sub>3</sub>, 400 MHz):  $\delta$  1.09 (t, 3H,  $J$  = 7.2 Hz), 2.48 (dq, 1H,  $J$  = 18.0,  $J$  = 7.2), 2.56 (dq, 1H,  $J$  = 18.0 Hz,  $J$  = 7.2 Hz), 2.88 (dd, 1H,  $J$  = 17.2 Hz,  $J$  = 6.0 Hz), 3.08 (dd, 1H,  $J$  = 17.2 Hz,  $J$  = 6.8 Hz), 5.94 (t, 1H,  $J$  = 6.8 Hz), 7.46 (dd, 1H,  $J$  = 7.6 Hz,  $J$  = 0.8 Hz), 7.52 (t, 1H,  $J$  = 7.6 Hz), 7.65 (t, 1H,  $J$  = 7.6 Hz,  $J$  = 1.2 Hz), 7.88 (d, 1H,  $J$  = 7.6 Hz). <sup>13</sup>C NMR (CDCl<sub>3</sub>, 100 MHz):  $\delta$  7.4, 36.8, 46.8, 76.9, 122.3, 125.7, 129.4, 134.2, 149.4, 170.0, 207.3. HRMS (ESI):  $m/z$  calcd for C<sub>12</sub>H<sub>12</sub>NaO<sub>3</sub> [M + Na]<sup>+</sup> 227.0679, found 227.0684.

### **3-(2-Oxobutyl)-5-vinylisobenzofuran-1(3H)-one (1h)**

Pale yellow liquid (28 mg, 40% yield); prepared following the general procedure from 4-vinylbenzoic acid (45.9 mg, 0.3 mmol) and ethyl vinyl ketone (61.6  $\mu$ L, 0.6 mmol); purified by flash chromatography (hexane/diethyl ether = 1:1). <sup>1</sup>H NMR (CDCl<sub>3</sub>, 400 MHz):  $\delta$  1.12 (t, 3H,  $J$  = 7.2 Hz), 2.50 (dq, 1H,  $J$  = 18.0 Hz,  $J$  = 7.2 Hz), 2.58 (dq, 1H,  $J$  = 18.0 Hz,  $J$  = 7.2 Hz), 2.88 (dd, 1H,  $J$  = 17.2 Hz,  $J$  = 6.8 Hz), 3.12 (dd, 1H,  $J$  = 17.2 Hz,  $J$  = 6.8 Hz), 5.46 (d, 1H,  $J$  = 11.2 Hz), 5.91 (d, 1H,  $J$  = 17.6 Hz), 5.94 (t, 1H,  $J$  = 6.8 Hz), 6.79 (dd, 1H,  $J$  = 17.6 Hz,  $J$  = 11.2 Hz), 7.45 (s, 1H), 7.57 (d, 1H,  $J$  = 8.0 Hz), 7.84 (d, 1H,  $J$  = 8.0 Hz). <sup>13</sup>C NMR (CDCl<sub>3</sub>, 75 MHz):  $\delta$  7.5, 36.8, 47.0, 76.6, 118.0, 119.8, 124.9, 125.9, 127.5, 135.6, 143.8, 150.2, 169.8, 207.4. IR (KBr):  $\nu$  1717, 1684, 1653, 1632, 1559, 1507. HRMS (ESI):  $m/z$  calcd for C<sub>14</sub>H<sub>14</sub>NaO<sub>3</sub> [M + Na]<sup>+</sup> 253.0835, found 253.0835.

### 3-(2-Oxobutyl)-5-phenylisobenzofuran-1(3H)-one (1i)

White solid (28 mg, 33% yield); prepared following the general procedure from [1,1'-biphenyl]-4-carboxylic acid (60.6 mg, 0.3 mmol) and ethyl vinyl ketone (61.6  $\mu$ L, 0.6 mmol); purified by flash chromatography (hexane/diethyl ether = 1:1); mp = 90–91 °C.  $^1\text{H}$  NMR ( $\text{CDCl}_3$ , 400 MHz):  $\delta$  1.12 (t, 3H,  $J = 7.2$  Hz), 2.50 (dq, 1H,  $J = 18.0$  Hz,  $J = 7.2$  Hz), 2.59 (dq, 1H,  $J = 18.0$  Hz,  $J = 7.2$  Hz), 2.93 (dd, 1H,  $J = 17.6$  Hz,  $J = 6.8$  Hz), 3.16 (dd, 1H,  $J = 17.6$  Hz,  $J = 6.8$  Hz), 6.00 (t, 1H,  $J = 6.8$  Hz), 7.48 (m, 3H), 7.60 (d, 2H,  $J = 8.8$  Hz), 7.65 (s, 1H), 7.75 (d, 1H,  $J = 8.0$  Hz), 7.95 (d, 1H,  $J = 8.0$  Hz).  $^{13}\text{C}$  NMR ( $\text{CDCl}_3$ , 125 MHz):  $\delta$  6.52, 35.8, 46.0, 75.8, 119.8, 123.5, 125.1, 126.5, 127.7, 127.8, 128.1, 138.6, 146.7, 149.3, 169.0, 206.3. IR (KBr):  $\nu$  2980, 1761, 1717, 1615, 1338. HRMS (ESI):  $m/z$  calcd for  $\text{C}_{18}\text{H}_{16}\text{KO}_3$   $[\text{M} + \text{K}]^+$  319.0731, found 319.0729.

### 5-Fluoro-3-(2-oxobutyl)isobenzofuran-1(3H)-one (1j)

White solid (14 mg, 21% yield); prepared following the general procedure from 4-fluorobenzoic acid (42.6 mg, 0.3 mmol) and ethyl vinyl ketone (61.6  $\mu$ L, 0.6 mmol); purified by PTLC (hexane/diethyl ether = 1:1); mp = 91–92 °C.  $^1\text{H}$  NMR ( $\text{CDCl}_3$ , 500 MHz):  $\delta$  1.12 (t, 3H,  $J = 7.5$  Hz), 2.49 (dq, 1H,  $J = 22.0$  Hz,  $J = 7.5$  Hz), 2.57 (dq, 1H,  $J = 22.0$  Hz,  $J = 7.5$  Hz), 2.86 (dd, 1H,  $J = 17.5$  Hz,  $J = 7.0$  Hz), 3.18 (dd, 1H,  $J = 17.5$  Hz,  $J = 6.0$  Hz), 5.91 (t, 1H,  $J = 7.0$  Hz), 7.18 (ddt, 1H,  $J = 8.0$  Hz,  $J = 2.5$  Hz,  $J = 0.5$  Hz), 7.23 (tdd, 1H,  $J = 9.0$  Hz,  $J = 2.5$  Hz,  $J = 0.5$  Hz), 7.89 (dd, 1H,  $J = 8.5$  Hz,  $J = 5.0$  Hz).  $^{13}\text{C}$  NMR ( $\text{CDCl}_3$ , 125 MHz):  $\delta$  7.5, 36.7, 46.7, 76.2 (d,  $J = 2.9$  Hz), 110.0 (d,  $J = 25.4$  Hz), 117.7 (d,  $J = 23.3$  Hz), 121.9 (d,  $J = 2.0$  Hz), 128.2 (d,  $J = 9.7$  Hz), 152.3 (d,  $J = 9.8$  Hz), 166.6 (d,  $J = 254.9$  Hz), 168.9, 207.2. IR (KBr):  $\nu$  2979, 2944, 1764, 1603, 1481, 1349. HRMS (ESI):  $m/z$  calcd for  $\text{C}_{12}\text{H}_{11}\text{FNaO}_3$   $[\text{M} + \text{Na}]^+$  245.0584, found 245.0574.

### 5-Iodo-3-(2-oxobutyl)isobenzofuran-1(3H)-one (1k)

White solid (15 mg, 15% yield); prepared following the general procedure from 4-iodobenzoic acid (75.9 mg, 0.3 mmol) and ethyl vinyl ketone (61.6  $\mu$ L, 0.6 mmol); purified by PTLC (dichloromethane/ethyl acetate = 58:2); mp = 132–133  $^{\circ}$ C.  $^1$ H NMR ( $\text{CDCl}_3$ , 500 MHz):  $\delta$  1.12 (t, 3H,  $J = 9.5$  Hz), 2.49 (dq, 1H,  $J = 22.5$  Hz,  $J = 9.5$  Hz), 2.57 (dq, 1H,  $J = 22.5$  Hz,  $J = 9.5$  Hz), 2.86 (dd, 1H,  $J = 17.5$  Hz,  $J = 7.0$  Hz), 3.14 (dd, 1H,  $J = 17.5$  Hz,  $J = 6.5$  Hz), 5.90 (t, 1H,  $J = 6.5$  Hz), 7.61 (d, 1H,  $J = 1.0$  Hz), 7.90 (m, 2H).  $^{13}$ C NMR ( $\text{CDCl}_3$ , 125 MHz):  $\delta$  6.5, 35.7, 45.6, 75.2, 101.2, 124.4, 125.9, 130.9, 137.9, 150.1, 168.3, 206.5. IR (KBr):  $\nu$  2980, 2940, 1762, 1716, 1559, 1541, 1457. HRMS (ESI):  $m/z$  calcd for  $\text{C}_{12}\text{H}_{11}\text{INaO}_3$   $[\text{M} + \text{Na}]^+$  352.9645, found 352.9641.

### 3-(2-Oxobutyl)naphtho[2,3-c]furan-1(3H)-one (1l)

White solid (**1l** + **1l'** combined yield 53 mg, 69%); prepared following the general procedure from  $\beta$ -naphthoic acid (51.7 mg, 0.3 mmol) and ethyl vinyl ketone (61.6  $\mu$ L, 0.6 mmol); purified by flash chromatography (hexane/diethyl ether = 1:1); isolated as a mixture with **1l'**.  $^1$ H NMR ( $\text{CDCl}_3$ , 400 MHz):  $\delta$  1.13 (t, 3H,  $J = 6.4$  Hz), 2.57 (m, 2H), 2.98 (dd, 1H,  $J = 17.6$  Hz,  $J = 6.4$  Hz), 3.21 (dd, 1H,  $J = 17.6$  Hz,  $J = 6.4$  Hz), 6.11 (t, 1H,  $J = 6.4$  Hz), 7.61 (m, 2H), 7.85 (m, 2H), 7.92 (m, 1H).  $^{13}$ C NMR ( $\text{CDCl}_3$ , 125 MHz):  $\delta$  7.5, 36.9, 47.6, 77.0, 121.4, 123.5, 126.8, 127.1, 128.4, 129.1, 129.9, 132.1, 135.9, 143.1, 170.0, 207.5. HRMS (ESI):  $m/z$  calcd for  $\text{C}_{16}\text{H}_{14}\text{NaO}_3$   $[\text{M} + \text{Na}]^+$  277.0835, found 277.0834.



### 3-(2-Oxobutyl)naphtho[1,2-*c*]furan-1(3*H*)-one (11')

White solid (**11** + **11'** combined yield 53 mg, 69%); prepared following the general procedure from  $\beta$ -naphthoic acid (51.7 mg, 0.3 mmol) and ethyl vinyl ketone (61.6  $\mu$ L, 0.6 mmol); purified by PTLC (hexane/diethyl ether = 1.5:2); mp = 109–111 °C. <sup>1</sup>H NMR (CDCl<sub>3</sub>, 400 MHz):  $\delta$  1.14 (t, 3H,  $J$  = 7.2 Hz), 2.54 (dq, 1H,  $J$  = 18.0 Hz,  $J$  = 7.2 Hz), 2.62 (dq, 1H,  $J$  = 18.0 Hz,  $J$  = 7.2 Hz), 2.89 (dd, 1H,  $J$  = 16.8 Hz,  $J$  = 9.2 Hz), 3.28 (dd, 1H,  $J$  = 16.8 Hz,  $J$  = 2.4 Hz), 6.39 (dd, 1H,  $J$  = 9.2 Hz,  $J$  = 2.4 Hz), 7.65-7.72 (m, 2H), 7.83-7.86 (m, 2H), 7.98 (d, 1H,  $J$  = 8.4 Hz), 8.04 (d, 1H,  $J$  = 7.6 Hz). <sup>13</sup>C NMR (CDCl<sub>3</sub>, 75 MHz):  $\delta$  7.5, 37.2, 47.2, 76.7, 120.6, 123.5, 123.6, 126.4, 128.0, 129.2, 129.7, 130.7, 136.3, 148.8, 170.5, 206.8. IR (KBr):  $\nu$  3060, 2977, 1757, 1717, 1459, 1328, 1052. HRMS (ESI):  $m/z$  calcd for C<sub>16</sub>H<sub>14</sub>NaO<sub>3</sub> [M + Na]<sup>+</sup> 277.0835, found 277.0828.

### 5-Acetyl-3-(2-oxobutyl)isobenzofuran-1(3*H*)-one (1m)

White solid (12 mg, 16% yield); prepared following the general procedure from 4-acetylbenzoic acid (54.6 mg, 0.3 mmol) and ethyl vinyl ketone (61.6  $\mu$ L, 0.6 mmol); purified by PTLC (dichloromethane/ethyl acetate = 58:2); mp = 154–155 °C. <sup>1</sup>H NMR (CDCl<sub>3</sub>, 400 MHz):  $\delta$  1.12 (t, 3H,  $J$  = 7.2 Hz), 2.50 (dq, 1H,  $J$  = 18.4 Hz,  $J$  = 7.2 Hz), 2.58 (dq, 1H,  $J$  = 18.4 Hz,  $J$  = 7.2 Hz), 2.68 (s, 3H), 2.95 (dd, 1H,  $J$  = 17.6 Hz,  $J$  = 6.0 Hz), 3.15 (dd, 1H,  $J$  = 17.6 Hz,  $J$  = 6.8 Hz), 6.01 (t, 1H,  $J$  = 6.4 Hz), 7.99 (d, 1H,  $J$  = 10.0 Hz), 8.04 (s, 1H), 8.11 (d, 1H,  $J$  = 10.0 Hz). <sup>13</sup>C NMR (CDCl<sub>3</sub>, 75 MHz):  $\delta$  7.5, 27.2, 36.8, 46.5, 77.2, 122.2, 126.2, 129.4, 129.5, 141.8, 149.7, 169.0, 197.0, 206.9. IR (KBr):  $\nu$  2976, 1766, 1715, 1690, 1422, 1362, 1277, 1207, 1056. HRMS (ESI):  $m/z$  calcd for C<sub>14</sub>H<sub>14</sub>NaO<sub>4</sub> [M + Na]<sup>+</sup> 269.0784, found 269.0782.

#### **6-Methoxy-3-(2-oxobutyl)isobenzofuran-1(3*H*)-one (1n)**

White solid (24 mg, 34% yield); prepared following the general procedure from 3-methoxybenzoic acid (46.2 mg, 0.3 mmol) and ethyl vinyl ketone (61.6  $\mu$ L, 0.6 mmol); purified by PTLC (hexane/ethyl acetate = 85:15); mp = 63–64 °C.  $^1\text{H}$  NMR ( $\text{CDCl}_3$ , 500 MHz):  $\delta$  1.10 (t, 3H,  $J = 7.5$  Hz), 2.48 (dq, 1H,  $J = 18.0$  Hz,  $J = 7.5$  Hz), 2.56 (dq, 1H,  $J = 18.0$  Hz,  $J = 7.5$  Hz), 2.83 (dd, 1H,  $J = 17.0$  Hz,  $J = 6.5$  Hz), 3.09 (dd, 1H,  $J = 17.0$  Hz,  $J = 6.5$  Hz), 3.86 (s, 3H), 5.89 (t, 1H,  $J = 6.5$  Hz), 7.21 (dd, 1H,  $J = 8.5$  Hz,  $J = 2.5$  Hz), 7.32 (d, 1H,  $J = 2.5$  Hz), 7.35 (dd, 1H,  $J = 8.5$  Hz,  $J = 0.5$  Hz).  $^{13}\text{C}$  NMR ( $\text{CDCl}_3$ , 75 MHz):  $\delta$  7.5, 36.9, 47.1, 55.8, 76.9, 107.5, 123.2, 123.3, 127.2, 141.9, 160.8, 170.2, 207.5. IR (KBr):  $\nu$  2944, 2856, 1765, 1483, 1423, 1344, 1302, 1145. HRMS (ESI):  $m/z$  calcd for  $\text{C}_{13}\text{H}_{14}\text{NaO}_4$  [ $\text{M} + \text{Na}$ ] $^+$  257.0784, found 257.0780.

#### **4-Methoxy-3-(2-oxobutyl)isobenzofuran-1(3*H*)-one (1n')**

White solid (28 mg, 40% yield); prepared following the general procedure from 3-methoxybenzoic acid (46.2 mg, 0.3 mmol) and ethyl vinyl ketone (61.6  $\mu$ L, 0.6 mmol); purified by PTLC (hexane/ethyl acetate = 58:2); mp = 94–95 °C.  $^1\text{H}$  NMR ( $\text{CDCl}_3$ , 500 MHz):  $\delta$  1.09 (t, 3H,  $J = 7.0$  Hz), 2.52 (q, 2H,  $J = 7.0$  Hz), 2.71 (dd, 1H,  $J = 16.5$  Hz,  $J = 9.5$  Hz), 3.28 (dd, 1H,  $J = 16.5$  Hz,  $J = 3.0$  Hz), 3.89 (s, 3H), 5.96 (dd, 1H,  $J = 9.5$  Hz,  $J = 3.0$  Hz), 7.10 (dd, 1H,  $J = 7.0$  Hz,  $J = 1.5$  Hz), 7.46-7.49 (m, 2H).  $^{13}\text{C}$  NMR ( $\text{CDCl}_3$ , 75 MHz):  $\delta$  7.4, 36.9, 44.8, 55.6, 76.0, 115.0, 117.4, 127.8, 131.2, 136.8, 154.1, 170.0, 206.8. IR (KBr):  $\nu$  2980, 1771, 1717, 1611, 1493, 1316, 1275. HRMS (ESI):  $m/z$  calcd for  $\text{C}_{13}\text{H}_{14}\text{NaO}_4$  [ $\text{M} + \text{Na}$ ] $^+$  257.0784, found 257.0777.

#### **4,5,6-Trimethoxy-3-(2-oxobutyl)-7-(3-oxopentyl)isobenzofuran-1(3H)-one (2)**

White solid (27 mg, 8% yield); prepared from 3,4,5-trimethoxybenzoic acid (63.6 mg, 0.3 mmol) and ethyl vinyl ketone (61.6  $\mu$ L, 0.6 mmol) following the general procedure but using  $[\text{Cp}^*\text{RhCl}_2]_2$  (14.82 mg, 0.024 mmol, 0.08 equiv), AgOTf (30.9 mg, 0.12 mmol, 0.40 equiv), and  $\text{Ag}_2\text{CO}_3$  (111.0 mg, 0.6 mmol, 2.0 equiv), in dioxane under argon, in the absence of DCPD; purified by PTLC (dichloromethane/ethyl acetate = 58:2); mp = 108–109  $^\circ\text{C}$ .  $^1\text{H}$  NMR ( $\text{CDCl}_3$ , 300 MHz):  $\delta$  1.06 (t, 3H,  $J = 6.0$  Hz), 1.10 (t, 3H,  $J = 6.0$  Hz), 2.47 (q, 2H,  $J = 7.2$  Hz), 2.53 (q, 2H,  $J = 7.2$  Hz), 2.67 (dd, 1H,  $J = 9.6$  Hz,  $J = 6.9$  Hz), 2.74 (dd, 1H,  $J = 16.5$  Hz,  $J = 9.0$  Hz), 3.16 (dd, 1H,  $J = 16.5$  Hz,  $J = 3.0$  Hz), 3.25 (dd, 1H,  $J = 9.0$  Hz,  $J = 6.9$  Hz), 3.85 (s, 3H), 3.91 (s, 3H), 3.95 (s, 1H), 5.86 (dd, 1H,  $J = 9.0$  Hz,  $J = 3.0$  Hz).  $^{13}\text{C}$  NMR ( $\text{CDCl}_3$ , 75 MHz):  $\delta$  7.4, 7.8, 19.1, 35.6, 37.0, 42.6, 45.4, 60.9, 61.3, 74.5, 77.2, 118.6, 131.5, 137.4, 145.7, 151.0, 153.6, 169.2, 206.8, 210.5. IR (KBr):  $\nu$  2976, 1758, 1716, 1482, 1348, 1115, 1017. HRMS (ESI):  $m/z$  calcd for  $\text{C}_{20}\text{H}_{27}\text{O}_7$   $[\text{M} + \text{H}]^+$  379.17513, found 379.17483.

#### ***N,N*-Dimethyl-2-(5,6,7-trimethoxy-3-oxo-1,3-dihydroisobenzofuran-1-yl)acetamide (3)**

White solid (32 mg, 34% yield); prepared following the general procedure from 3,4,5-trimethoxybenzoic acid (63.6 mg, 0.3 mmol) and *N,N*-dimethylacrylamide (62.1  $\mu$ L, 0.6 mmol); purified by flash chromatography (hexane/diethyl ether = 1:1); mp = 122–123  $^\circ\text{C}$ .  $^1\text{H}$  NMR ( $\text{CDCl}_3$ , 400 MHz):  $\delta$  2.65 (dd, 1H,  $J = 16.0$  Hz,  $J = 9.2$  Hz), 3.00 (s, 6H), 3.12 (dd, 1H,  $J = 16.0$  Hz,  $J = 1.6$  Hz), 3.90 (s, 3H), 3.93 (s, 3H), 3.98 (s, 3H), 6.02 (dd, 1H,  $J = 9.2$  Hz,  $J = 1.6$  Hz), 7.11 (s, 1H).  $^{13}\text{C}$  NMR ( $\text{CDCl}_3$ , 75 MHz):  $\delta$  35.7, 37.1, 37.4, 56.4, 60.9, 61.2, 76.7, 102.6, 121.3, 134.5, 146.8, 147.5, 155.8, 168.6, 169.9. IR (KBr):  $\nu$  2948, 2835, 1762, 1480, 1420, 1344. HRMS (ESI):  $m/z$  calcd for  $\text{C}_{15}\text{H}_{19}\text{KNO}_6$   $[\text{M} + \text{K}]^+$  348.0844, found 348.0841.

**Methyl 2-(5,6,7-trimethoxy-3-oxo-1,3-dihydroisobenzofuran-1-yl)acetate (4a)**

White solid (59 mg, 66% yield); prepared following the general procedure from 3,4,5-trimethoxybenzoic acid (63.6 mg, 0.3 mmol) and methyl acrylate (54.0  $\mu$ L, 0.6 mmol); purified by flash chromatography (hexane/diethyl ether = 1:1); mp = 76–77 °C.  $^1\text{H}$  NMR ( $\text{CDCl}_3$ , 500 MHz):  $\delta$  2.64 (dd, 1H,  $J = 16.5$  Hz,  $J = 9.0$  Hz), 3.20 (dd, 1H,  $J = 16.5$  Hz,  $J = 3.5$  Hz), 3.73 (s, 3H), 3.91 (s, 3H), 3.93 (s, 3H), 3.99 (s, 1H), 5.83 (dd, 1H,  $J = 9.0$  Hz,  $J = 3.5$  Hz), 7.12 (s, 1H).  $^{13}\text{C}$  NMR ( $\text{CDCl}_3$ , 125 MHz):  $\delta$  38.3, 52.2, 56.4, 60.9, 61.2, 75.7, 102.6, 121.2, 133.6, 146.7, 147.4, 156.0, 169.7, 169.8. IR (KBr):  $\nu$  2950, 2839, 1770, 1742, 1616, 1480, 1420, 1344. HRMS (ESI):  $m/z$  calcd for  $\text{C}_{14}\text{H}_{17}\text{O}_7$  [ $\text{M} + \text{H}$ ] $^+$  297.09688, found 297.09678.

**(E)-Methyl 3-(5,6,7-trimethoxy-1-(2-methoxy-2-oxoethyl)-3-oxo-1,3-dihydroisobenzofuran-4-yl)acrylate (4b)**

White solid (23 mg, 20% yield); prepared following the general procedure from 3,4,5-trimethoxybenzoic acid (63.6 mg, 0.3 mmol) and vinyl acrylate (54.0  $\mu$ L, 0.6 mmol); purified by flash chromatography (hexane/diethyl ether = 1:1); mp = 161–162 °C.  $^1\text{H}$  NMR ( $\text{CDCl}_3$ , 400 MHz):  $\delta$  2.63 (dd, 1H,  $J = 16.4$  Hz,  $J = 8.8$  Hz), 3.21 (dd, 1H,  $J = 16.4$  Hz,  $J = 3.6$  Hz), 3.74 (s, 3H), 3.82 (s, 3H), 3.88 (s, 3H), 3.97 (s, 3H), 4.03 (s, 3H), 5.78 (dd, 1H,  $J = 8.8$  Hz,  $J = 3.6$  Hz), 7.02 (d, 1H,  $J = 16.4$  Hz), 8.51 (d, 1H,  $J = 16.4$  Hz).  $^{13}\text{C}$  NMR ( $\text{CDCl}_3$ , 125 MHz):  $\delta$  38.1, 51.8, 52.2, 60.5, 61.0, 61.2, 74.5, 119.4, 123.4, 124.5, 133.9, 137.0, 148.1, 150.5, 156.0, 167.8, 168.4, 169.7. IR (KBr):  $\nu$  2952, 2843, 1761, 1718, 1457, 1436. HRMS (ESI):  $m/z$  calcd for  $\text{C}_{18}\text{H}_{20}\text{NaO}_9$  [ $\text{M} + \text{Na}$ ] $^+$  403.1000, found 403.0995.

**4,5,6-Trimethoxy-3-((phenylsulfonyl)methyl)isobenzofuran-1(3H)-one (5a)**

White solid (27 mg, 24% yield); prepared following the general procedure from 3,4,5-trimethoxybenzoic acid (63.6 mg, 0.3 mmol) and phenyl vinyl sulfone (102 mg, 0.6 mmol); purified by flash chromatography (hexane/diethyl ether = 1:1); mp = 161–162 °C. <sup>1</sup>H NMR (CDCl<sub>3</sub>, 400 MHz): δ 3.37 (dd, 1H, *J* = 15.2 Hz, *J* = 9.2 Hz), 3.89 (s, 3H), 3.91 (s, 3H), 4.01 (s, 3H), 4.03 (dd, 1H, *J* = 15.2 Hz, *J* = 2.0 Hz), 5.84 (dd, 1H, *J* = 9.2 Hz, *J* = 2.0 Hz), 7.05 (s, 1H), 7.59 (m, 2H), 7.69 (m, 1H), 7.97 (d, 1H, *J* = 8.0 Hz). <sup>13</sup>C NMR (CDCl<sub>3</sub>, 75 MHz): δ 56.5, 59.0, 61.0, 61.3, 73.6, 102.5, 120.8, 128.4, 129.3, 131.6, 134.2, 139.4, 146.6, 147.3, 156.6, 168.8. IR (KBr): ν 2992, 2847, 1772, 1615, 1480, 1422, 1343, 1143, 1107, 1060. HRMS (ESI): *m/z* calcd for C<sub>18</sub>H<sub>18</sub>NaO<sub>7</sub>S [M + Na]<sup>+</sup> 401.0665, found 401.0662.

**(E)-4,5,6-Trimethoxy-3-((phenylsulfonyl)methyl)-7-(2-(phenylsulfonyl)vinyl)isobenzofuran-1(3H)-one (5b)**

White solid (80 mg, 49% yield); prepared following the general procedure from 3,4,5-trimethoxybenzoic acid (63.6 mg, 0.3 mmol) and phenyl vinyl sulfone (102 mg, 0.6 mmol); purified by flash chromatography (hexane/diethyl ether = 1:1); mp = 80–81 °C. <sup>1</sup>H NMR (CDCl<sub>3</sub>, 400 MHz): δ 3.39 (dd, 1H, *J* = 14.8 Hz, *J* = 9.2 Hz), 3.85 (s, 3H), 3.91 (s, 3H), 4.00 (dd, 1H, *J* = 14.8 Hz, *J* = 2.0 Hz), 4.07 (s, 3H), 5.78 (dd, 1H, *J* = 9.2 Hz, *J* = 2.0 Hz), 7.55 (m, 7H), 7.68 (m, 1H), 7.92 (m, 4H), 8.34 (d, 1H, *J* = 16.0 Hz). <sup>13</sup>C NMR (CDCl<sub>3</sub>, 125 MHz): δ 58.4, 60.8, 61.2, 61.4, 72.7, 119.3, 120.9, 127.8, 128.3, 129.3, 129.3, 131.2, 133.3, 133.8, 134.3, 135.0, 139.3, 140.5, 148.9, 150.0, 156.7, 167.2. IR (KBr): ν 3065, 2944, 2851, 1764, 1483, 1447, 1344, 1307, 1145, 1085. HRMS (ESI): *m/z* calcd for C<sub>26</sub>H<sub>24</sub>KO<sub>9</sub>S<sub>2</sub> [M + K]<sup>+</sup> 583.0493, found 583.0490.

**(E)-3-((Ethylsulfonyl)methyl)-7-(2-(ethylsulfonyl)vinyl)-4,5,6-trimethoxyisobenzofuran-1(3H)-one (6)**

White solid (113 mg, 84% yield); prepared following the general procedure from 3,4,5-trimethoxybenzoic acid (63.6 mg, 0.3 mmol) and ethyl vinyl sulfone (20.9  $\mu$ L, 0.6 mmol); purified by recrystallisation (hexane/diethyl ether = 2:1); mp = 147–148 °C.  $^1\text{H}$  NMR ( $\text{CDCl}_3$ , 400 MHz):  $\delta$  1.40 (t, 3H,  $J = 7.6$  Hz), 1.44 (t, 3H,  $J = 7.6$  Hz), 3.10 (q, 2H,  $J = 7.6$  Hz), 3.21 (dd, 1H,  $J = 15.6$  Hz,  $J = 10.0$  Hz), 3.28 (q, 2H,  $J = 7.6$  Hz), 3.77 (dd, 1H,  $J = 15.6$  Hz,  $J = 1.6$  Hz), 3.93 (s, 3H), 3.97 (s, 3H), 4.12 (s, 3H), 5.84 (d, 1H,  $J = 10.0$  Hz,  $J = 1.6$  Hz), 7.53 (d, 1H,  $J = 16.0$  Hz), 8.27 (d, 1H,  $J = 16.0$  Hz).  $^{13}\text{C}$  NMR ( $\text{CDCl}_3$ , 125 MHz):  $\delta$  6.4, 7.2, 49.2, 49.3, 54.7, 61.0, 61.3, 61.4, 73.2, 118.8, 121.1, 131.0, 133.2, 135.2, 149.0, 150.3, 156.8, 167.4. IR (KBr):  $\nu$  2984, 1764, 1603, 1483, 1458, 1344, 1305. HRMS (ESI):  $m/z$  calcd for  $\text{C}_{18}\text{H}_{24}\text{NaO}_9\text{S}_2$  [ $\text{M} + \text{Na}$ ] $^+$  471.0754, found 471.0746.

#### 4. Preparation of 7

A solution of  $\text{NaNO}_2$  (266 mg, 2.16 mmol, 1.01 equiv) in water (3 mL) was added dropwise to an ice-cold suspension of 2-amino-3,4,5-trimethoxybenzoic acid (500 mg, 2.13 mmol, 1.00 equiv) in 48% aqueous  $\text{HBF}_4$  (864  $\mu$ L, 5.40 mmol) under stirring. Stirring was continued at 0 °C for 1 h. After this time, methanol (4 mL), methyl acrylate (262 mL, 2.92 mmol, 1.37 equiv), and  $\text{Pd}(\text{OAc})_2$  (9.6 mg, 42.8  $\mu$ mol, 0.02 equiv) were added to the mixture at 0 °C. Mixture was let warm up to room temperature, then heated under reflux (70 °C) for 2 h. After this time, the mixture was cooled down to room temperature, and the solvent removed under vacuum.  $\text{Et}_2\text{O}$  (10 mL) was added to the residue, and the resulting solution was extracted with  $\text{H}_2\text{O}$  (3 x 2 mL). The organic layer was dried over  $\text{MgSO}_4$  and concentrated at reduced pressure. Purification of the crude mixture by column chromatography on silica gel (eluent: hexane/ethyl acetate = 75/15) afforded methyl 2-carboxy-3,4,5-trimethoxyphenylcinnamate **7** as a white solid (181 mg, 0.61 mmol, 29% yield). Compounds **4a** (261

mg, 0.88 mmol, 41% yield) and **4b** (14 mg, 36.8  $\mu$ mol, 2% yield) were also recovered. mp = 147–149 °C.  $^1\text{H}$  NMR [ $(\text{CD}_3)_2\text{CO}$ , 400 MHz]:  $\delta$  3.73 (s, 3H), 3.84 (s, 3H), 3.90 (s, 3H), 3.95 (s, 3H), 6.55 (d, 1H,  $J$  = 6.0 Hz), 7.34 (s, 1H), 8.13 (d, 1H,  $J$  = 16.0 Hz).  $^{13}\text{C}$  NMR [ $(\text{CD}_3)_2\text{CO}$ , 100 MHz]:  $\delta$  51.2, 56.0, 60.5, 60.6, 110.3, 121.9, 122.6, 128.3, 139.5, 145.9, 153.8, 154.4, 167.8, 168.0. IR (KBr):  $\nu$  2952, 1698, 1682, 1583, 1490, 1325, 1125. Anal. calcd. for  $\text{C}_{14}\text{H}_{16}\text{O}_7$ : C 56.60; H 5.44; found: C 56.76; H 5.44.

## 5. Conversion of 7 into 4a

A mixture of  $[(\text{COD})\text{RhCl}]_2$  (3.94 mg, 0.008 mmol, 8 mol%) and AgOTf (6.18 mg, 0.024 mmol, 24 mol%) in chlorobenzene (200  $\mu\text{L}$ ) was stirred in a glass tube at room temperature for 30 minutes. Dicyclopentadiene (4.3  $\mu\text{L}$ , 0.032 mmol, 32 mol%) was added. Mixture turned instantaneously from light yellow to dark orange. Then, **7** (30 mg, 0.10 mmol, 1.0 equiv),  $\text{Cu}(\text{OAc})_2 \cdot \text{H}_2\text{O}$  (79.7 mg, 0.40 mmol, 4.0 equiv), and chlorobenzene (300  $\mu\text{L}$ ) were added. The tube was sealed and heated at 120 °C for 48 hours. After this time the reaction mixture was quenched with 28%  $\text{NH}_4\text{OH}$  (2 mL) and extracted with ethyl acetate (3 x 2 mL). The organic layers were combined and filtered through a short pad of silica gel. The filtrate was concentrated under reduced pressure to afford **4a** as a white solid (27 mg, 0.091 mmol, 91% yield).

## 6. Conversion of 7 into 4a and 4b

A mixture of  $[(\text{COD})\text{RhCl}]_2$  (4.73 mg, 9.6  $\mu\text{mol}$ , 8 mol%) and AgOTf (7.42 mg, 28.8  $\mu\text{mol}$ , 24 mol%) in chlorobenzene (240  $\mu\text{L}$ ) was stirred in a glass tube at room temperature for 30 minutes. Dicyclopentadiene (5.2  $\mu\text{L}$ , 38.4  $\mu\text{mol}$ , 32 mol%) was added. Mixture turned instantaneously from light yellow to dark orange. Then, **7** (35 mg, 0.12 mmol, 1.0 equiv),  $\text{Cu}(\text{OAc})_2 \cdot \text{H}_2\text{O}$  (93.9 mg, 0.47

mmol, 4.0 equiv), methyl acrylate (10.8  $\mu\text{L}$ , 0.12 mmol, 1.0 equiv) and chlorobenzene (360  $\mu\text{L}$ ) were added. The tube was sealed and heated at 120  $^{\circ}\text{C}$  for 48 hours. After this time the reaction mixture was quenched with 28%  $\text{NH}_4\text{OH}$  (2 mL) and extracted with ethyl acetate (3 x 2 mL). The organic layers were combined and filtered through a short pad of silica gel. The filtrate was concentrated under reduced pressure. Purification of the crude mixture by column chromatography on silica gel (eluent: hexane/diethyl ether = 7/3) afforded **4a** (14 mg, 0.048 mmol, 35% yield) and **4b** (30 mg, 0.080 mmol, 65% yield) as white solids.



## 7. X-ray crystal structure determination of (COD)<sub>2</sub>RhOTf

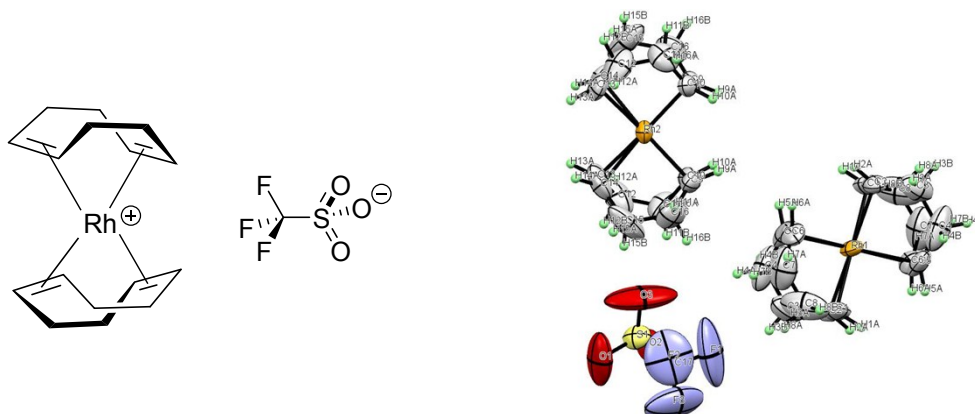

**Figure S1** Molecular structure of (COD)<sub>2</sub>RhOTf with displacement ellipsoids drawn at 50% probability for non-H atoms.

---

[(COD)RhCl]<sub>2</sub> (200 mg, 0.40 mmol, 1.0 equiv) was dissolved in acetone (15 mL) under nitrogen. Solution was orange. AgOTf (208 mg, 0.81 mmol, 2.0 equiv) was added to this solution. The addition resulted in the immediate formation of a white precipitate and in a color change of solution from orange to pale yellow. After 5 min stirring, (*endo*)-dicyclopentadiene (114.5 μL, 0.81 mmol, 2.0 equiv) was added. Solution color instantaneously turned dark red. After 30 min of additional stirring at room temperature, the mixture was filtered by cannula under nitrogen. Filtrate was dried under vacuum leaving a red solid residue. Single crystals were grown from Me<sub>2</sub>CO/Et<sub>2</sub>O (15 mL, 1/20 [v/v]) at -18 °C. The single crystal was mounted in a glass capillary. Data for (COD)<sub>2</sub>RhOTf were collected at -70 °C on a Rigaku/MSM Mercury CCD area-detector diffractometer equipped with monochromated MoK $\alpha$  radiation. Calculations for (COD)<sub>2</sub>RhOTf were performed with the teXane crystallographic software package of Molecular Structure Corporation. X-ray analysis of (COD)<sub>2</sub>RhOTf was consistent with that reported in the literature.<sup>2</sup>

**Table S1** Crystal data and structure refinement for **(COD)<sub>2</sub>RhOTf**.

---

|                                   |                                             |                             |
|-----------------------------------|---------------------------------------------|-----------------------------|
| Empirical formula                 | C17 H24 F3 O3 Rh S                          |                             |
| Formula weight                    | 468.33                                      |                             |
| Temperature                       | 230(2) K                                    |                             |
| Wavelength                        | 0.71075 Å                                   |                             |
| Crystal system                    | monoclinic                                  |                             |
| Space group                       | C2/c                                        |                             |
| Unit cell dimensions              | a = 14.084(4) Å                             | $\alpha = 90^\circ$ .       |
|                                   | b = 17.652(5) Å                             | $\beta = 95.320(3)^\circ$ . |
|                                   | c = 14.840(4) Å                             | $\gamma = 90^\circ$ .       |
| Volume                            | 3673.3(18) Å <sup>3</sup>                   |                             |
| Z                                 | 8                                           |                             |
| Density (calculated)              | 1.694 Mg/m <sup>3</sup>                     |                             |
| Absorption coefficient            | 1.086 mm <sup>-1</sup>                      |                             |
| F(000)                            | 1904                                        |                             |
| Crystal size                      | 0.14 x 0.10 x 0.05 mm <sup>3</sup>          |                             |
| Theta range for data collection   | 2.31 to 27.44°.                             |                             |
| Index ranges                      | -18 ≤ h ≤ 10, -15 ≤ k ≤ 22, -19 ≤ l ≤ 19    |                             |
| Reflections collected             | 14349                                       |                             |
| Independent reflections           | 4133 [R(int) = 0.0437]                      |                             |
| Completeness to theta = 27.44°    | 98.4 %                                      |                             |
| Max. and min. transmission        | 0.9477 and 0.8629                           |                             |
| Refinement method                 | Full-matrix least-squares on F <sup>2</sup> |                             |
| Data / restraints / parameters    | 4133 / 7 / 228                              |                             |
| Goodness-of-fit on F <sup>2</sup> | 1.083                                       |                             |
| Final R indices [I > 2σ(I)]       | R1 = 0.0618, wR2 = 0.1423                   |                             |
| R indices (all data)              | R1 = 0.0867, wR2 = 0.1580                   |                             |
| Largest diff. peak and hole       | 0.748 and -0.722 e.Å <sup>-3</sup>          |                             |

---

**Table S2** Selected bond lengths [Å] and angles [°] for **(COD)<sub>2</sub>RhOTf**.

---

|                 |           |
|-----------------|-----------|
| Rh(1)-C(5)      | 2.214(7)  |
| Rh(1)-C(2)      | 2.220(6)  |
| Rh(1)-C(1)      | 2.231(7)  |
| Rh(1)-C(6)      | 2.232(7)  |
| C(1)-C(2)       | 1.343(10) |
| C(1)-C(8)       | 1.472(13) |
| C(1)-H(1A)      | 0.9900    |
| C(2)-C(3)       | 1.491(10) |
| C(3)-C(4)       | 1.479(13) |
| C(3)-H(3A)      | 0.9800    |
| C(4)-C(5)       | 1.492(14) |
| C(5)-C(6)       | 1.350(12) |
| C(6)-C(7)       | 1.480(13) |
| C(7)-C(8)       | 1.384(14) |
| S(1)-O(3)       | 1.315(8)  |
| S(1)-O(2)       | 1.394(5)  |
| S(1)-O(1)       | 1.405(7)  |
| S(1)-C(17)      | 1.813(10) |
| C(17)-F(3)      | 1.218(12) |
| C(17)-F(1)      | 1.241(10) |
| C(17)-F(2)      | 1.292(11) |
|                 |           |
| C(5)-Rh(1)-C(2) | 81.7(3)   |
| C(5)-Rh(1)-C(1) | 90.8(3)   |
| C(2)-Rh(1)-C(1) | 35.1(3)   |
| C(5)-Rh(1)-C(6) | 35.4(3)   |
| C(2)-Rh(1)-C(6) | 90.9(3)   |
| C(1)-Rh(1)-C(6) | 79.0(3)   |
| C(2)-C(1)-C(8)  | 127.9(9)  |
| C(2)-C(1)-Rh(1) | 72.0(4)   |
| C(8)-C(1)-Rh(1) | 109.2(6)  |
| C(2)-C(1)-H(1A) | 113.2     |
| C(1)-C(2)-C(3)  | 124.8(8)  |
| C(1)-C(2)-Rh(1) | 72.9(4)   |

|                 |           |
|-----------------|-----------|
| C(3)-C(2)-Rh(1) | 108.0(5)  |
| C(1)-C(2)-H(2A) | 114.4     |
| C(4)-C(3)-C(2)  | 118.7(8)  |
| O(3)-S(1)-O(2)  | 113.2(6)  |
| O(3)-S(1)-O(1)  | 119.5(8)  |
| O(2)-S(1)-O(1)  | 110.1(5)  |
| O(3)-S(1)-C(17) | 105.2(6)  |
| O(2)-S(1)-C(17) | 105.0(4)  |
| O(1)-S(1)-C(17) | 102.0(5)  |
| F(3)-C(17)-F(1) | 109.1(14) |
| F(3)-C(17)-F(2) | 108.3(11) |
| F(1)-C(17)-F(2) | 105.8(9)  |
| F(3)-C(17)-S(1) | 112.9(7)  |
| F(1)-C(17)-S(1) | 109.7(9)  |
| F(2)-C(17)-S(1) | 110.7(9)  |

---

## 8. References

- (1) H. Zhang, S. Zhang, L. Liu, G. Luo, W. Duan, W. Wang, *J. Org. Chem.* **2010**, *75*, 368–374.
- (2) L. Dahlenburg, N. Osthoff, F. W. Heinemann *Acta Cryst.* **2001**, *E57*, m117–m118.

## 9. NMR spectra of products

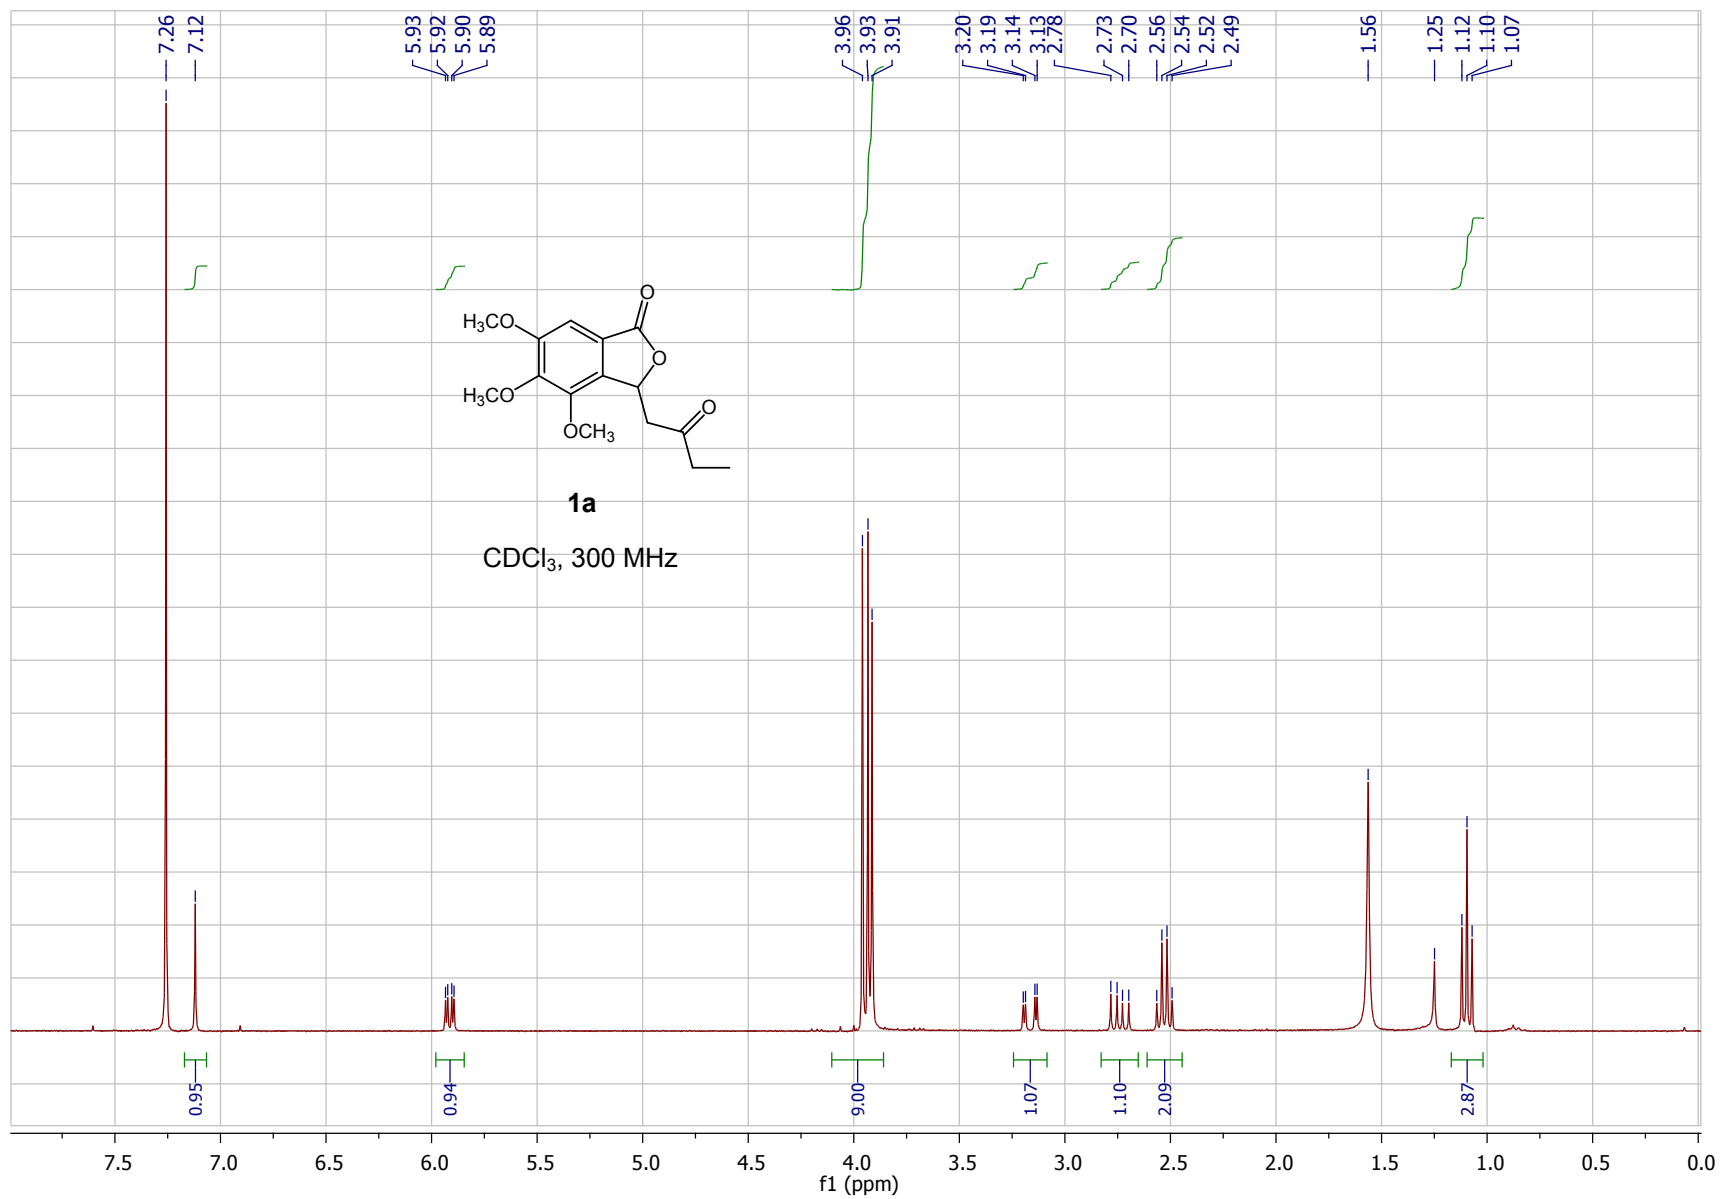

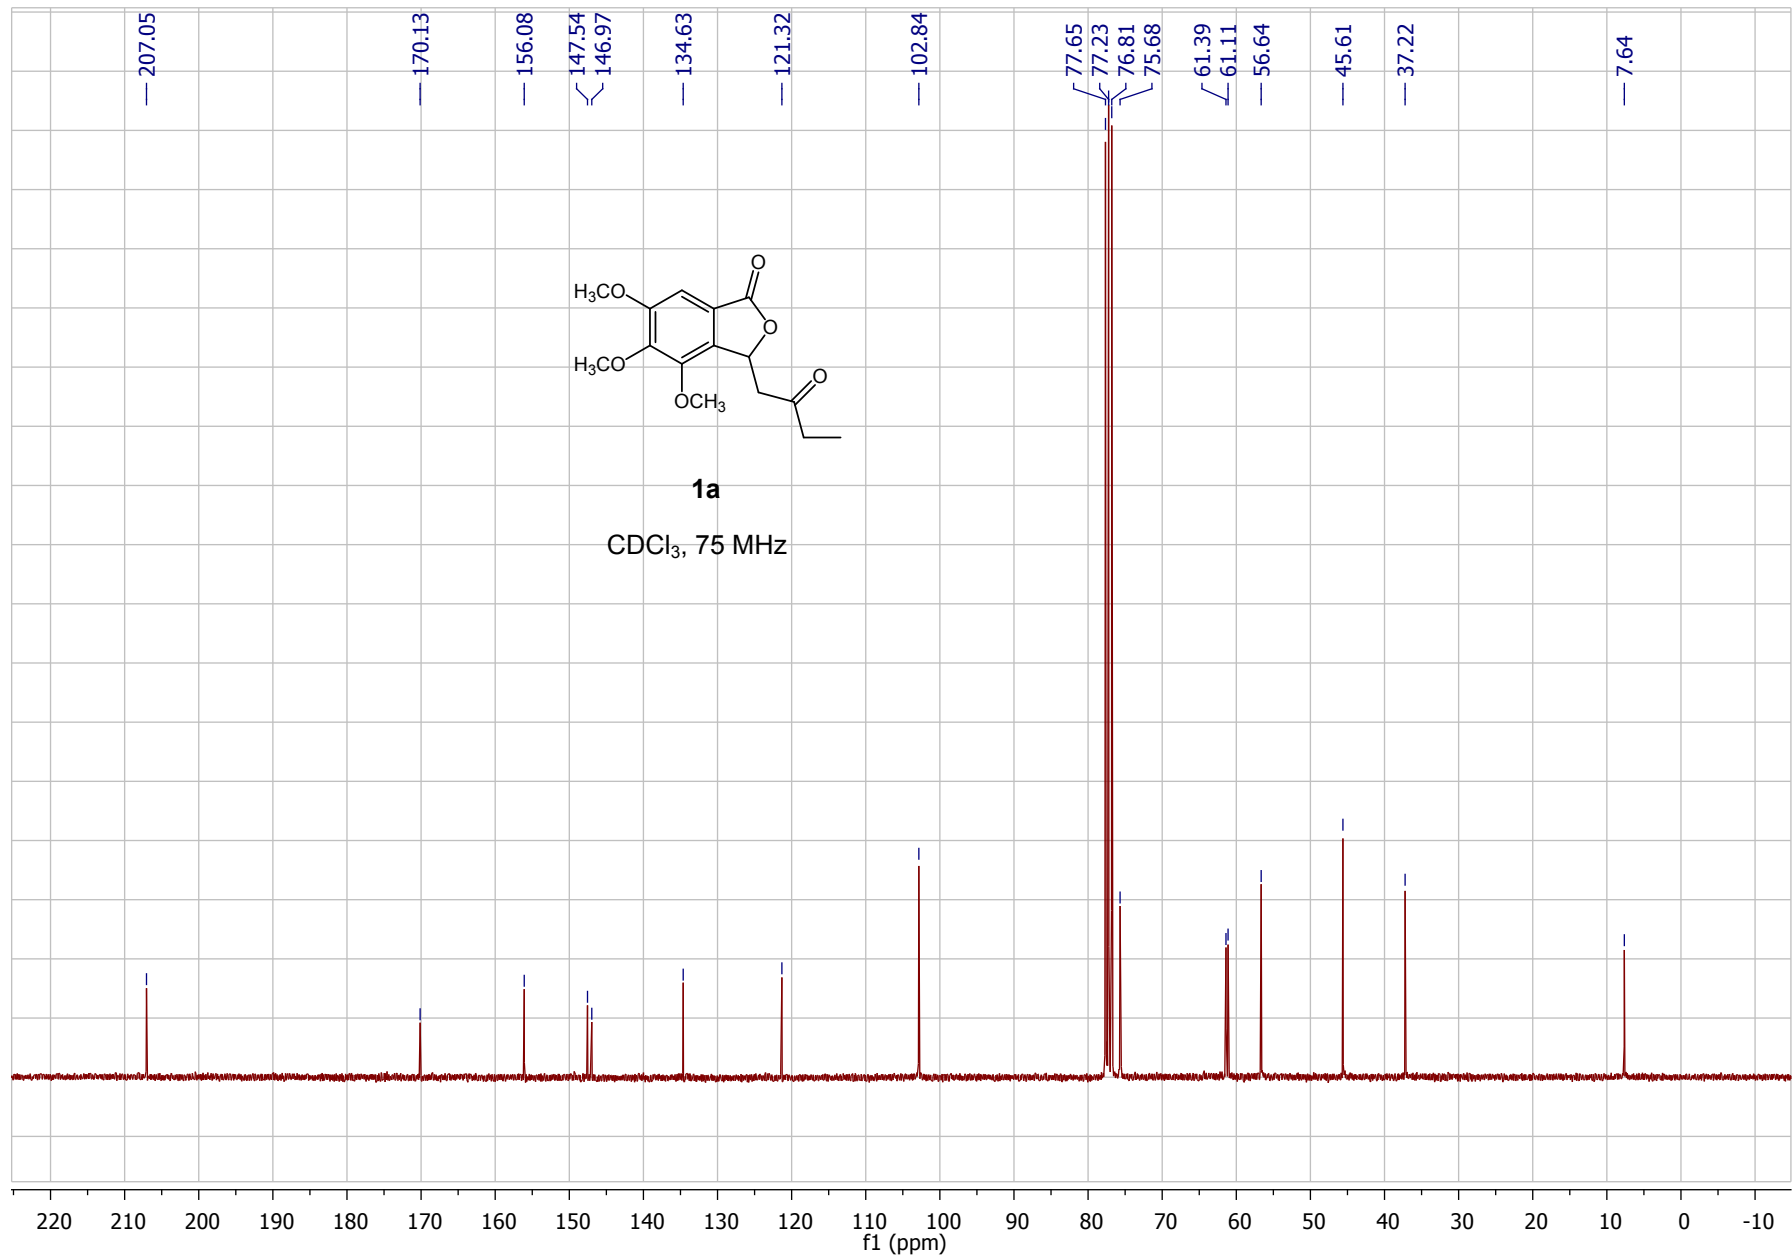

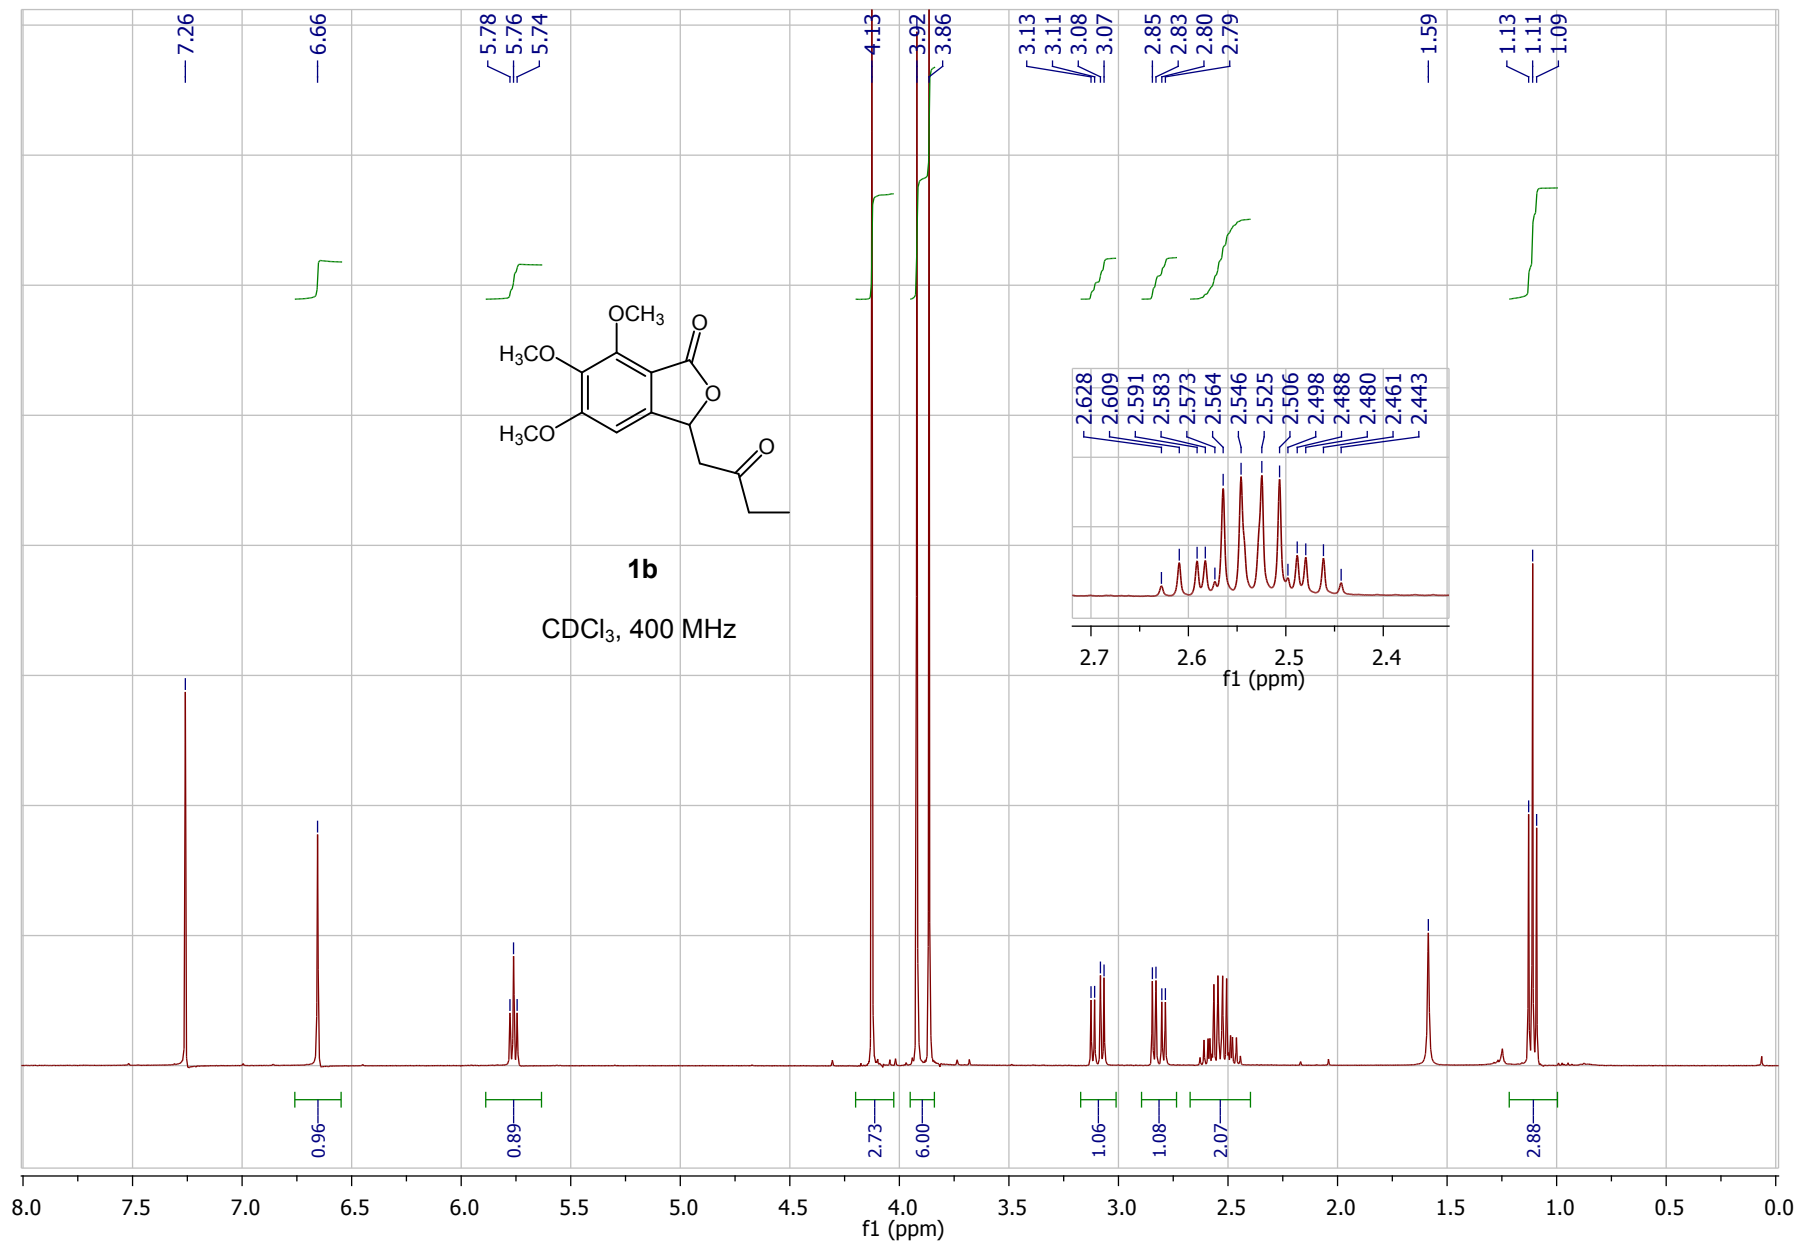

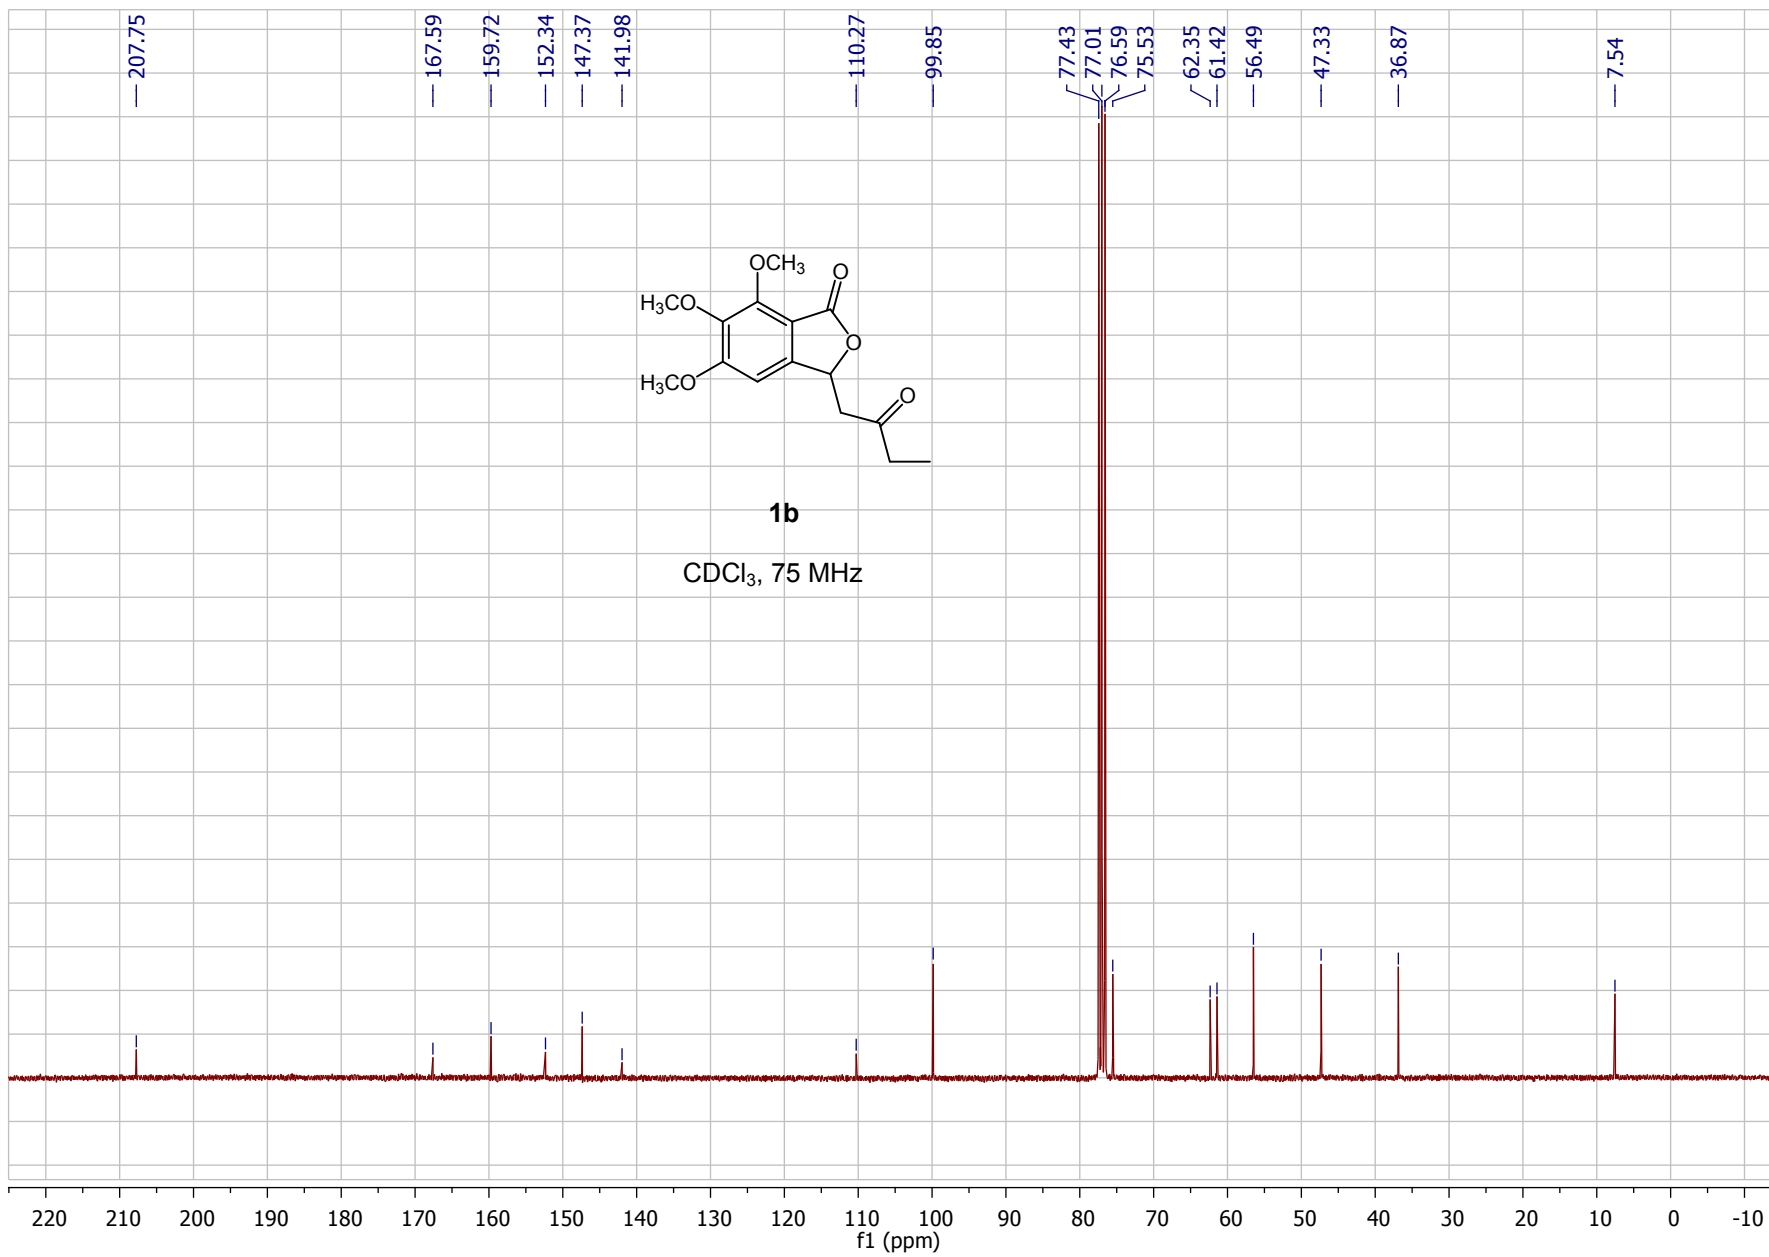



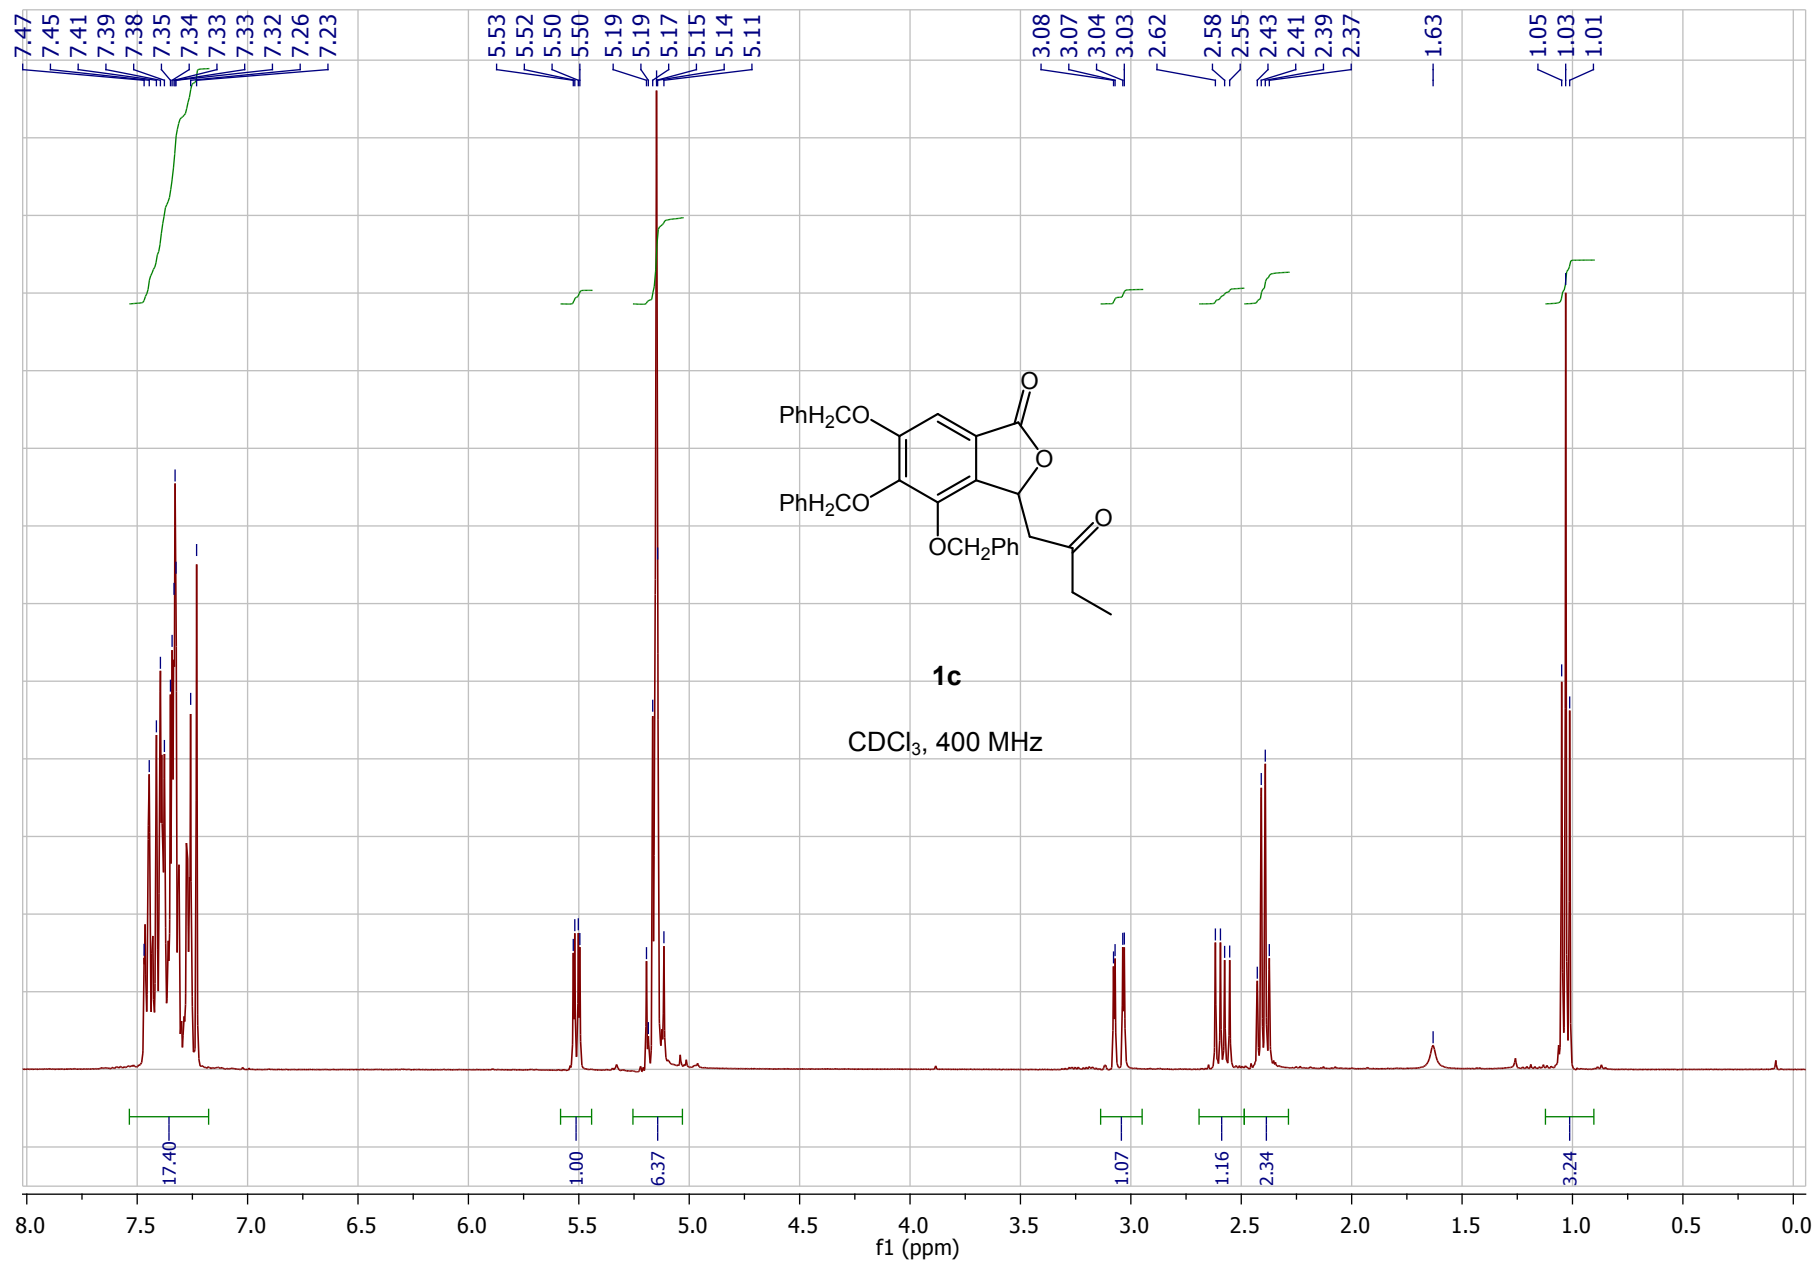

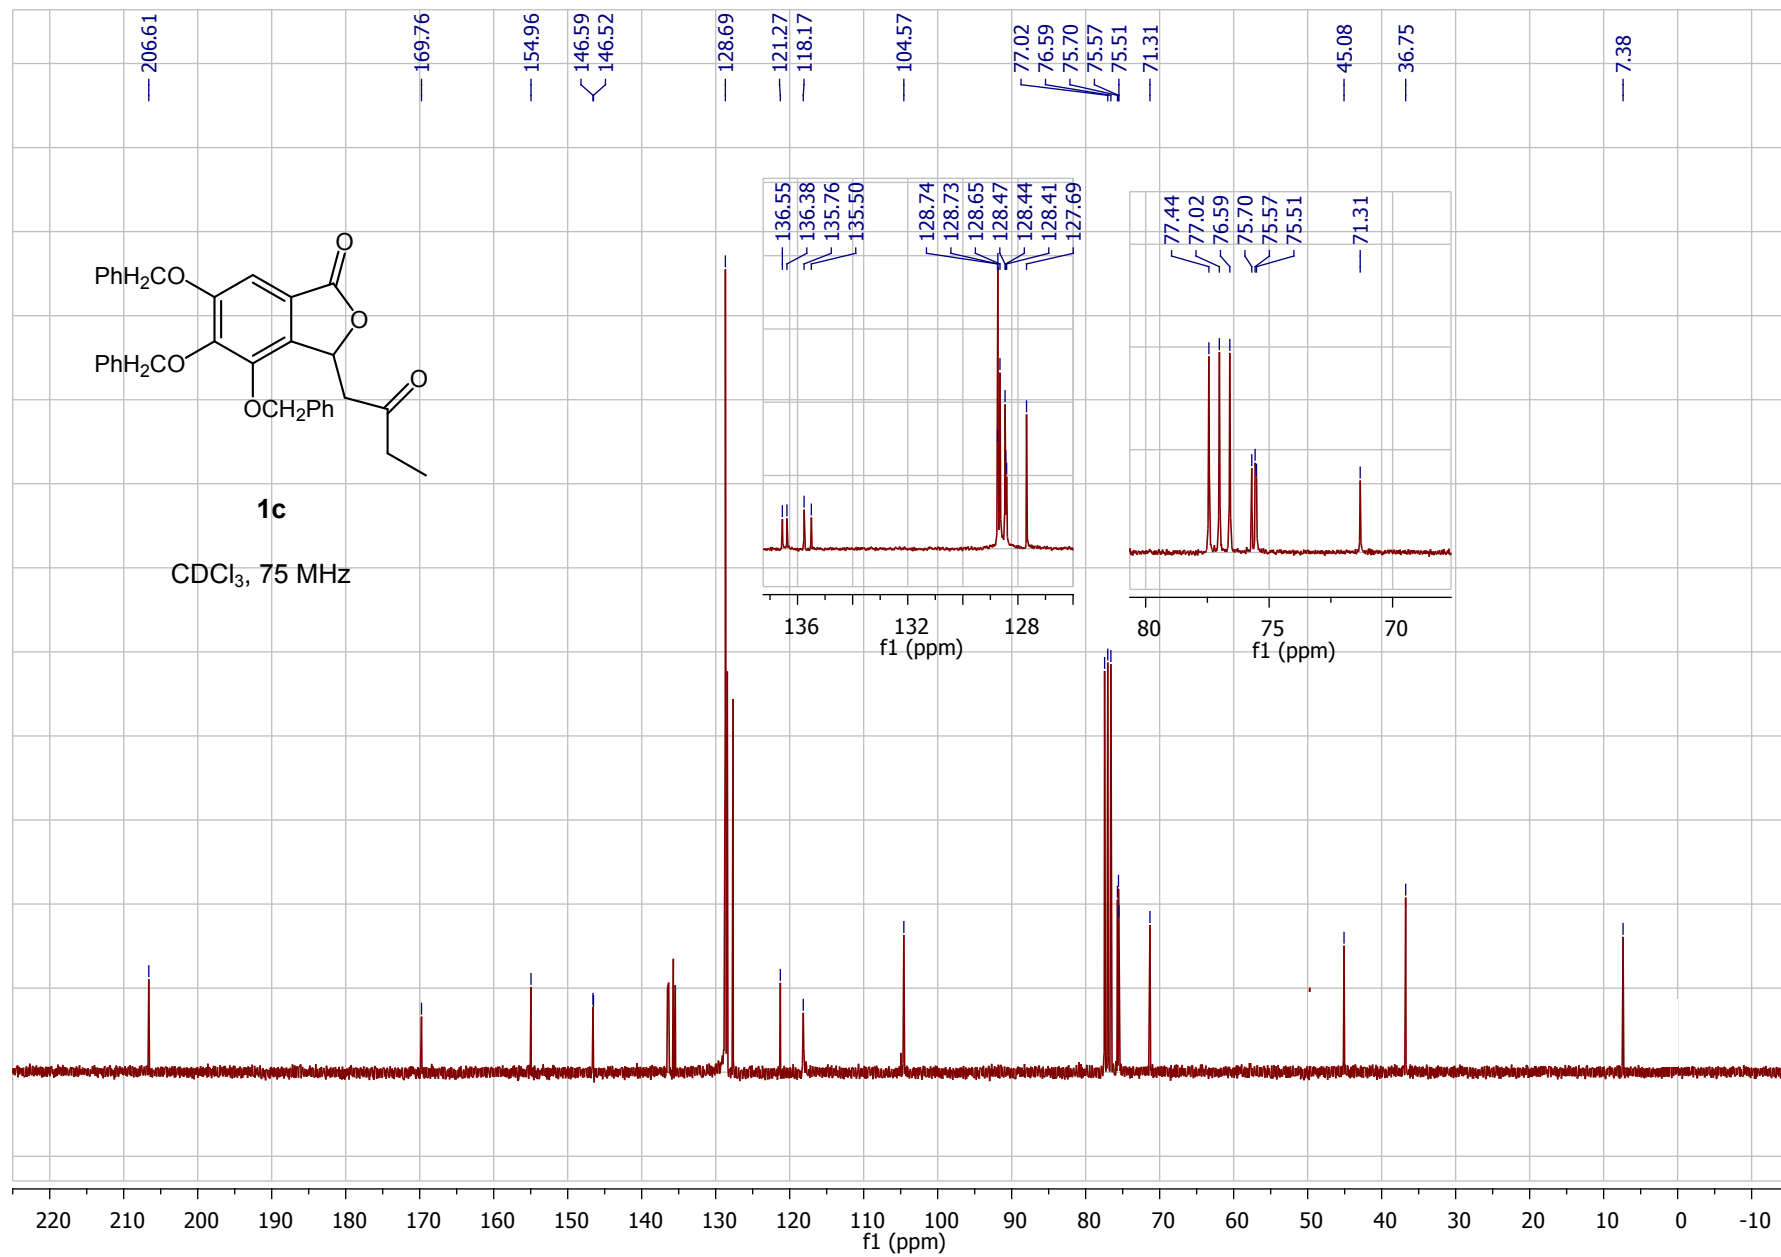

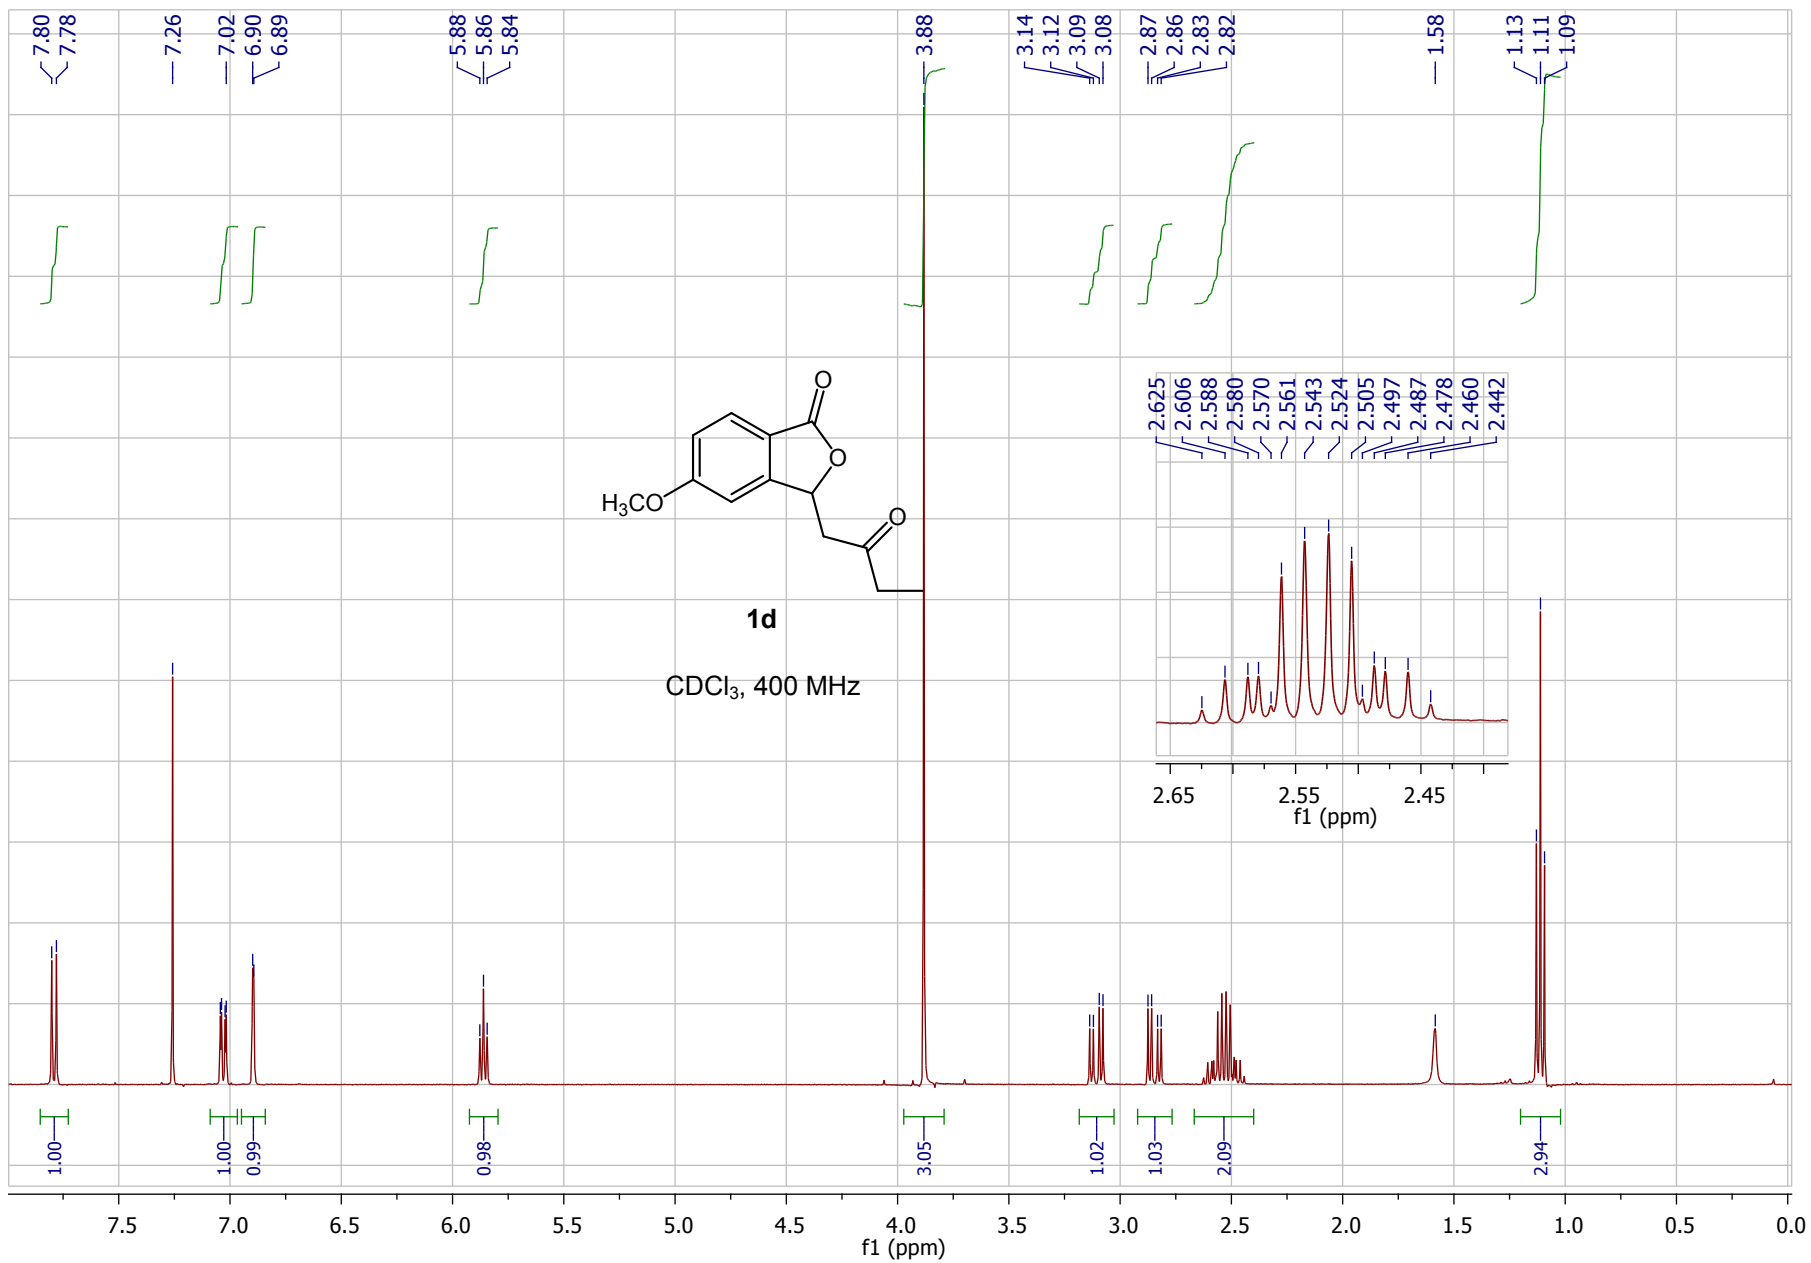

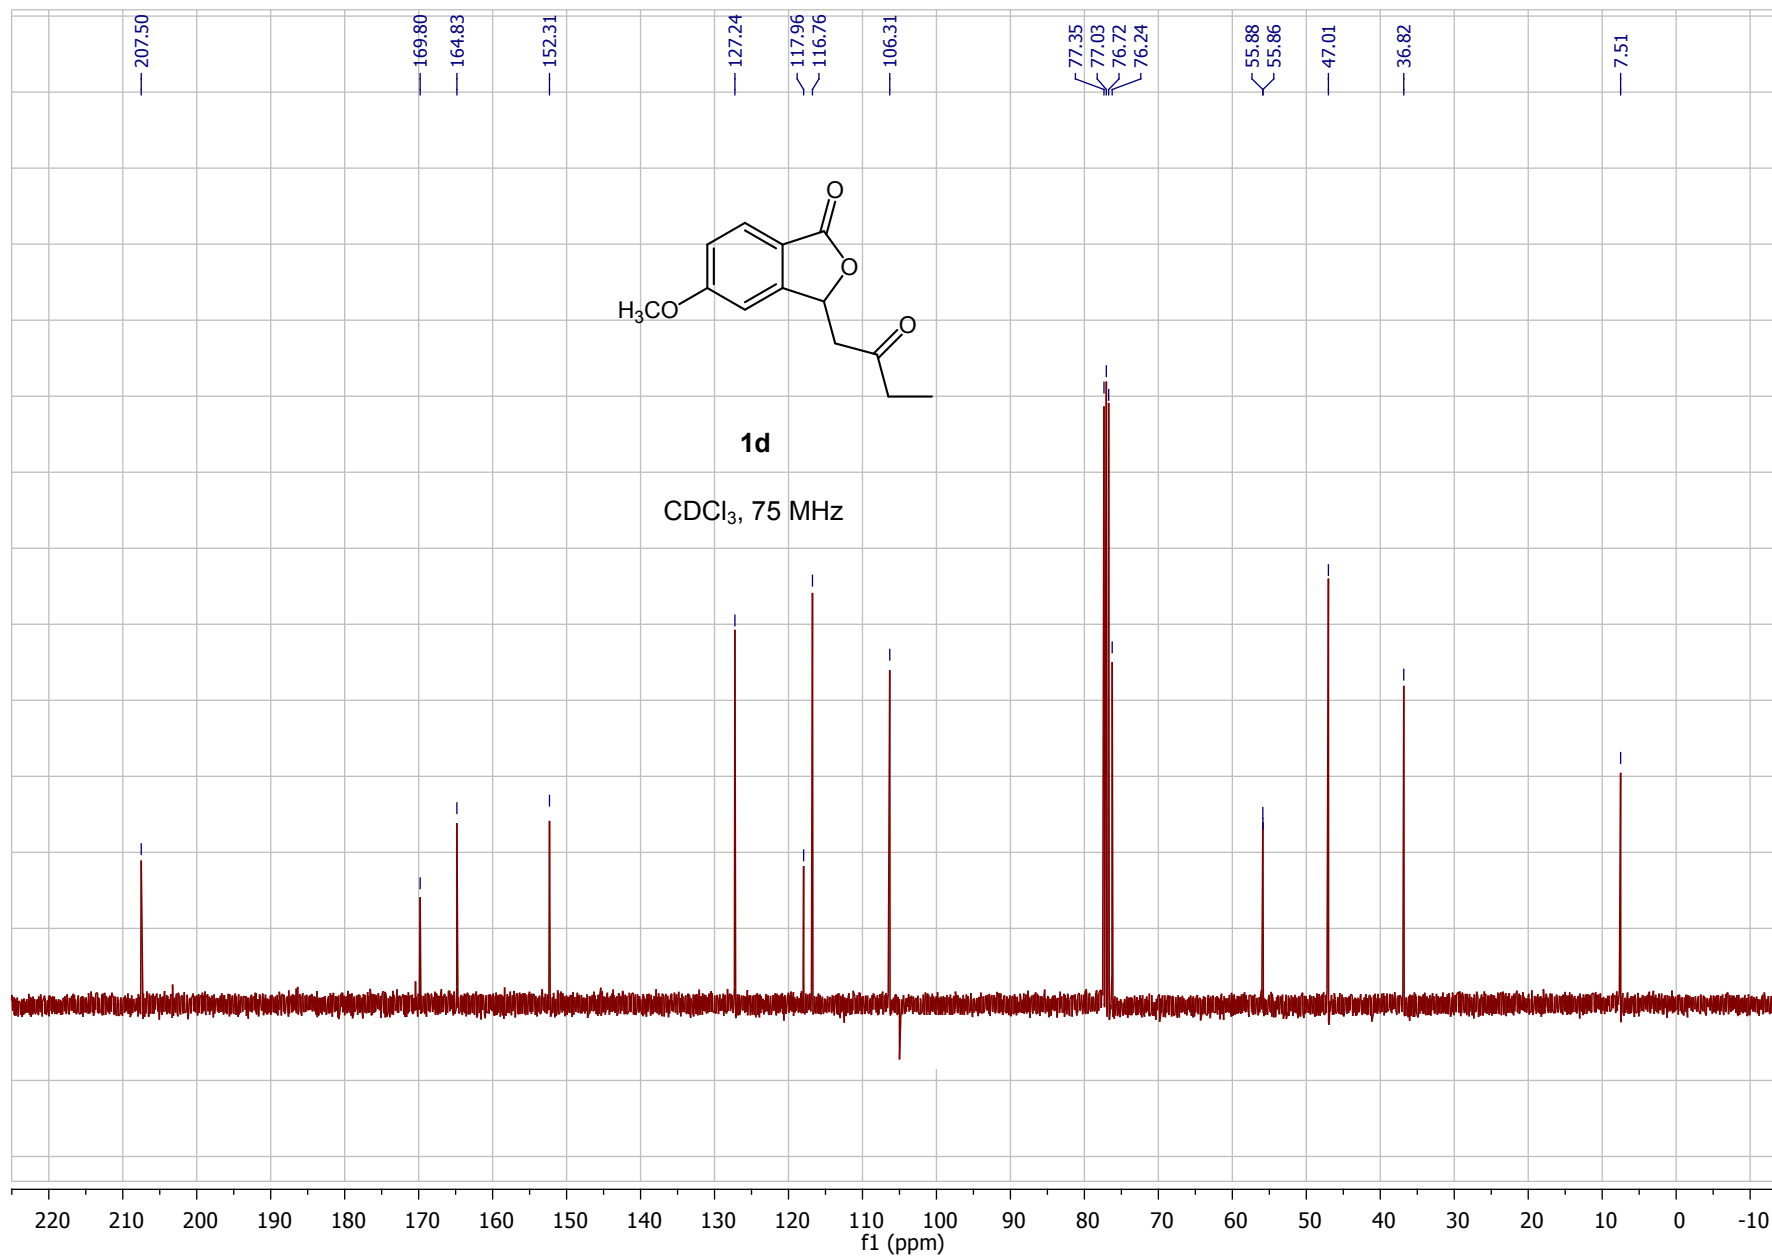

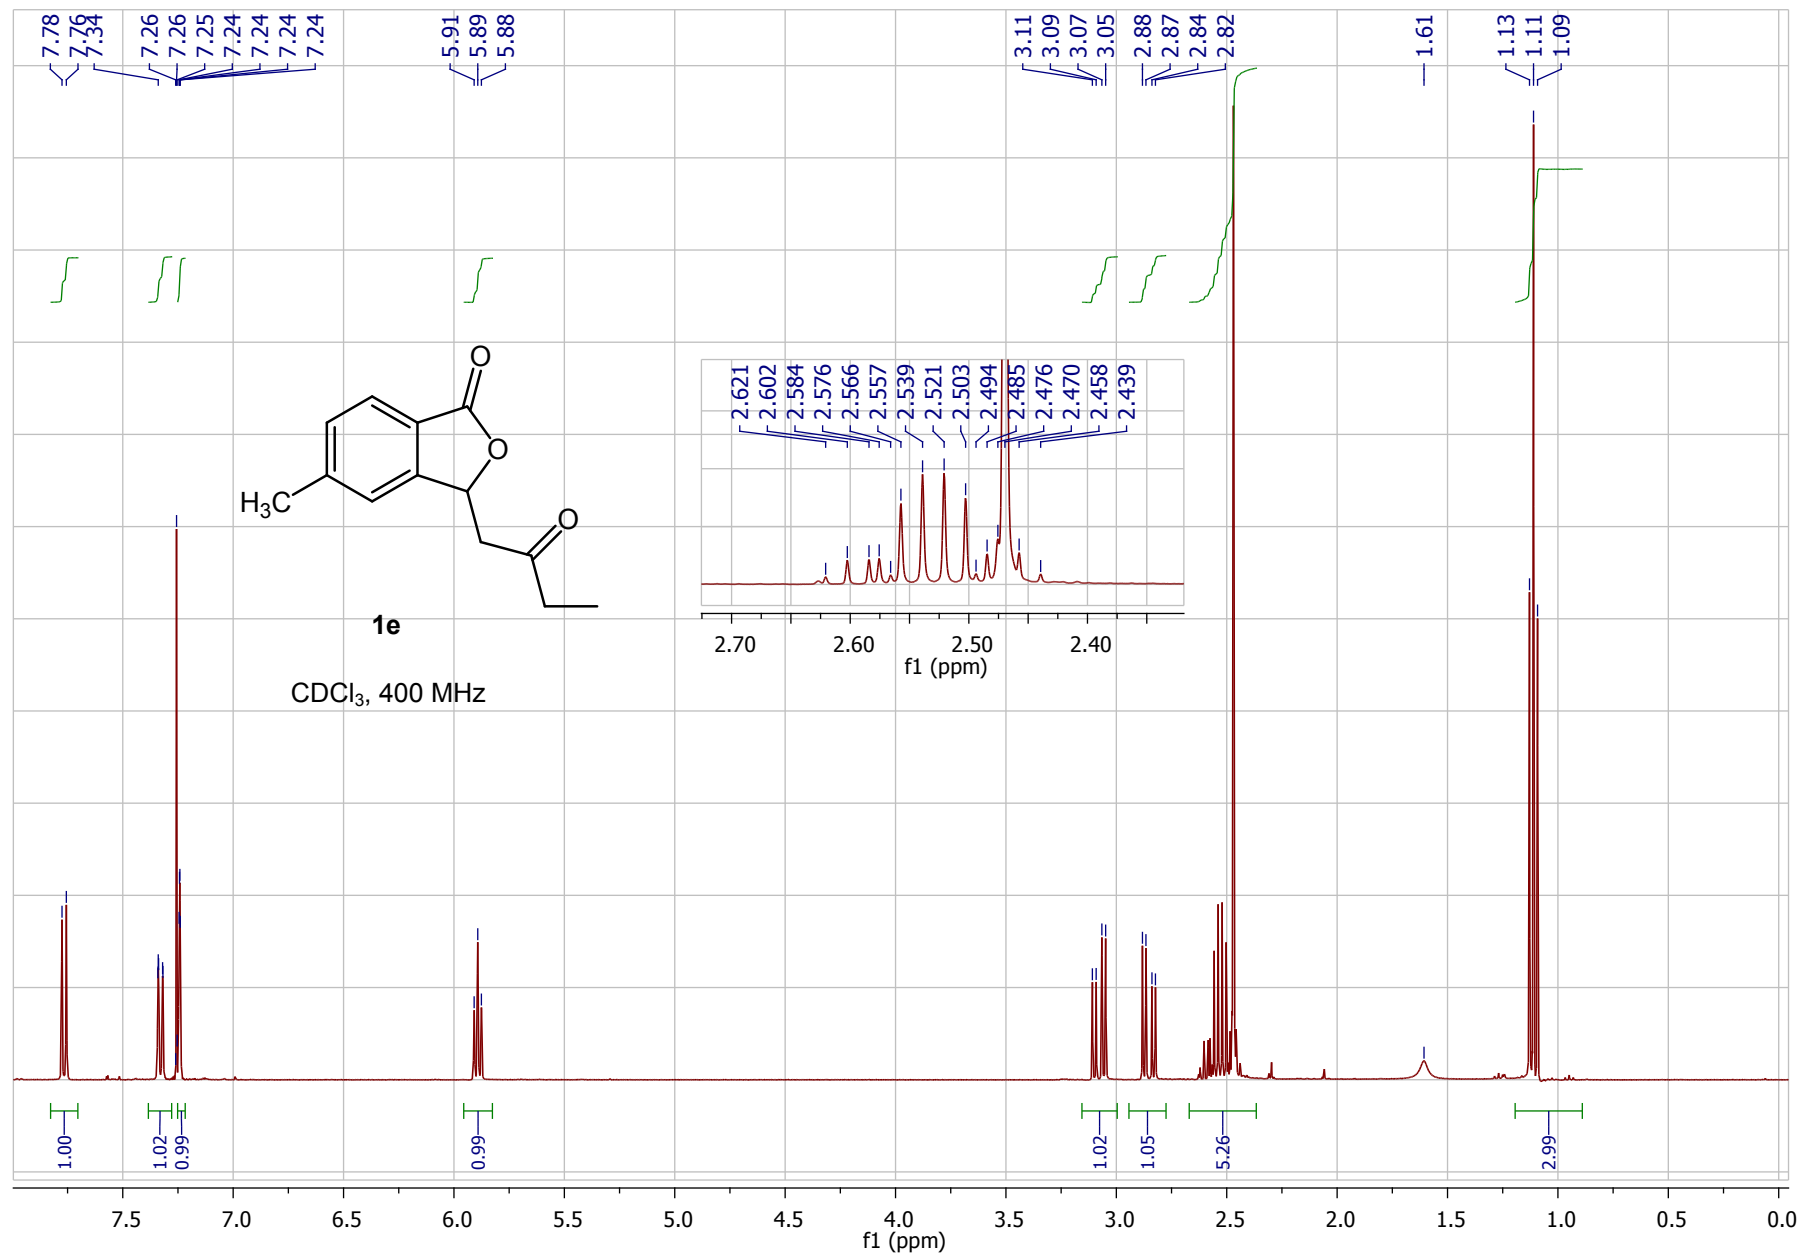

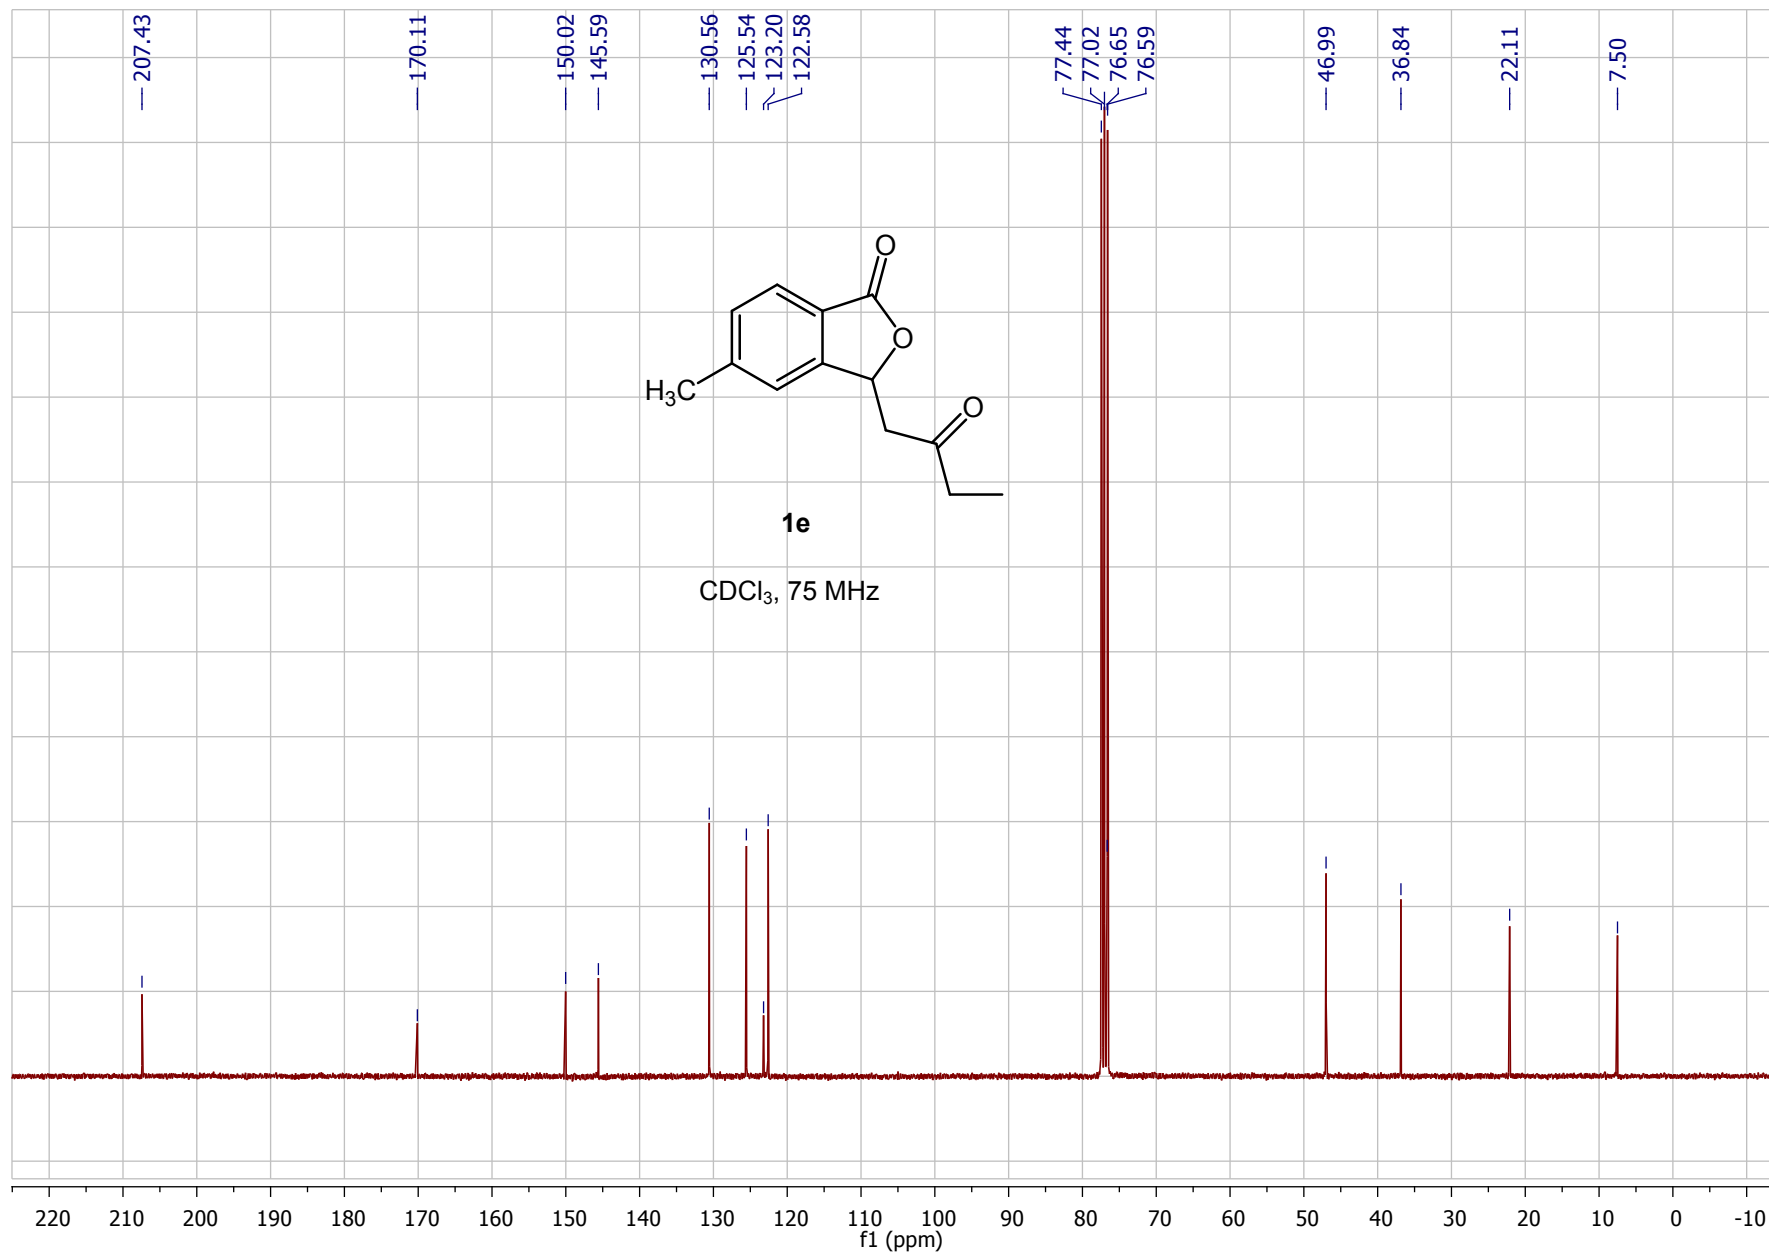

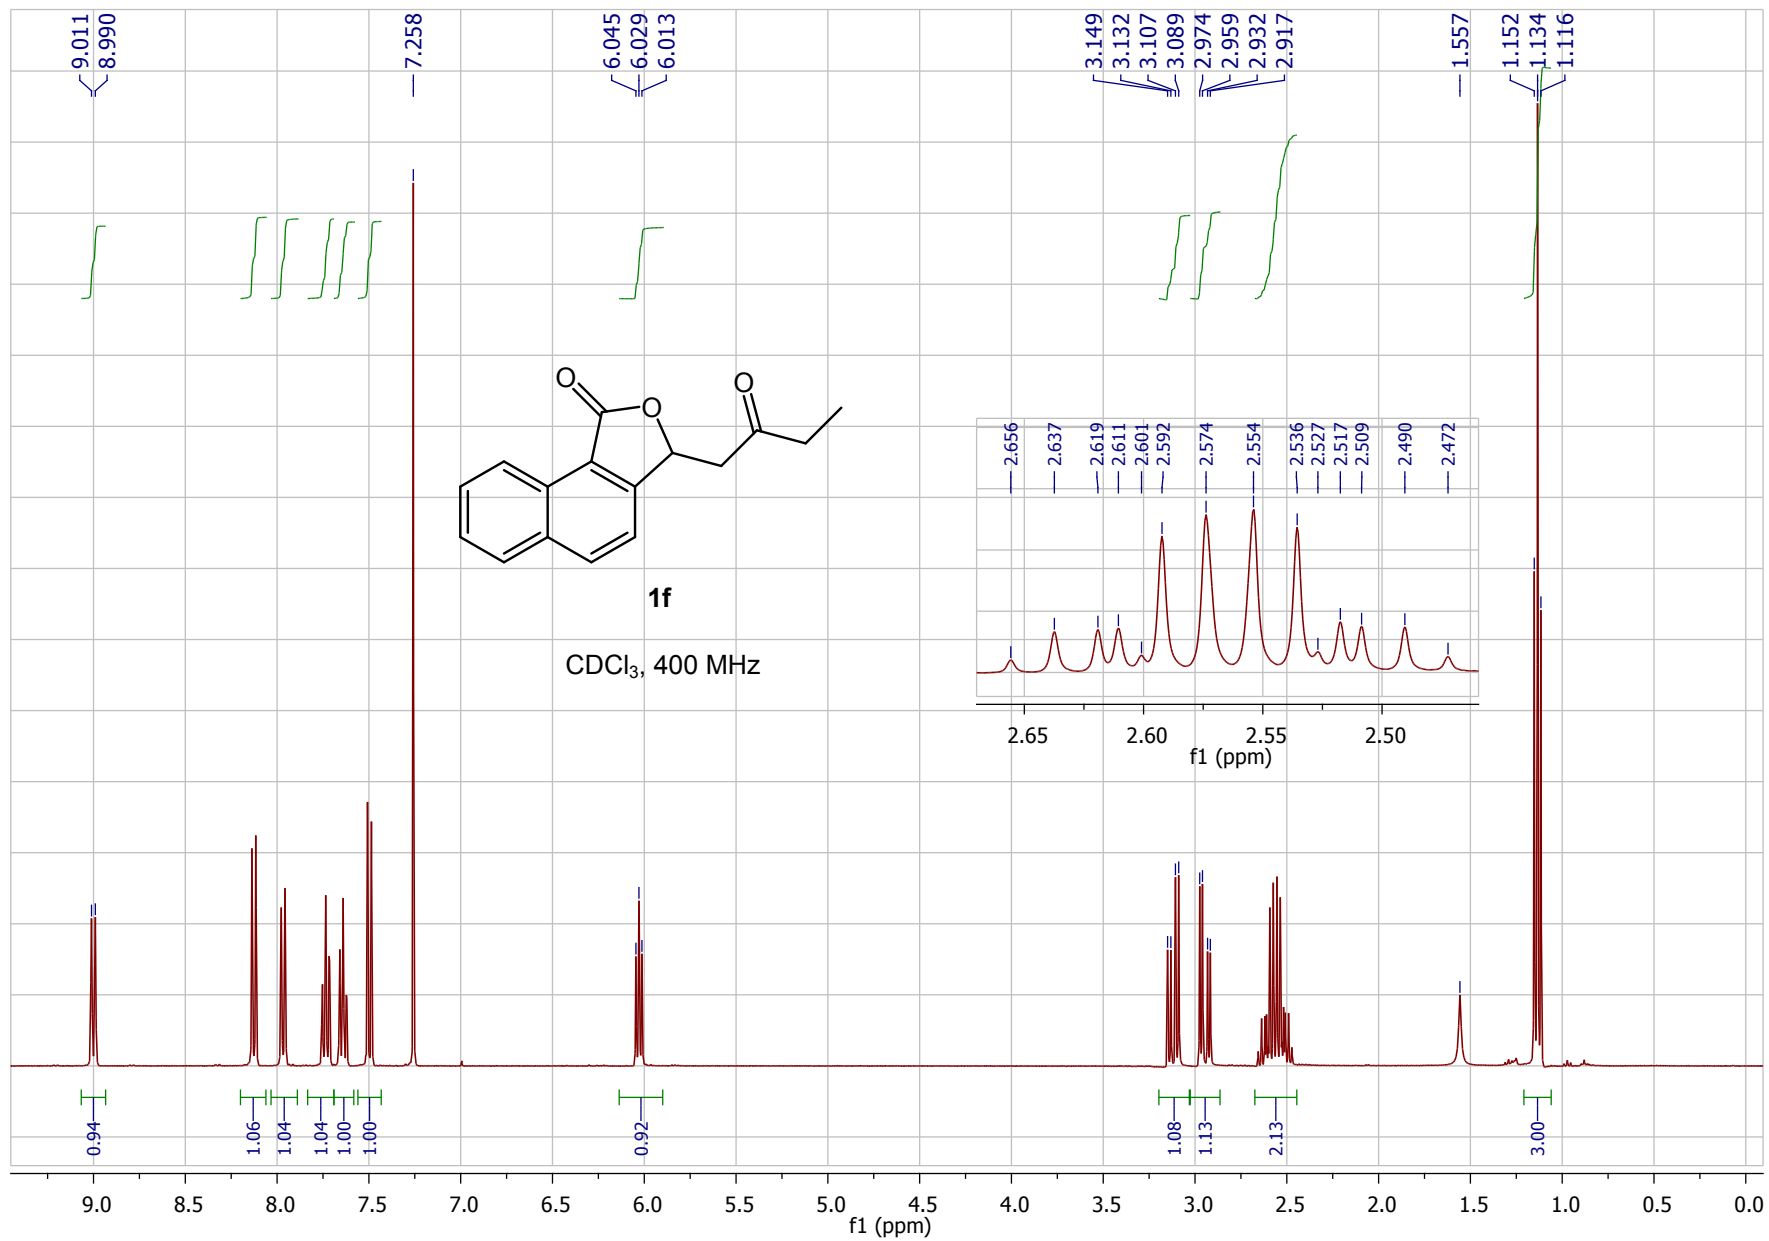

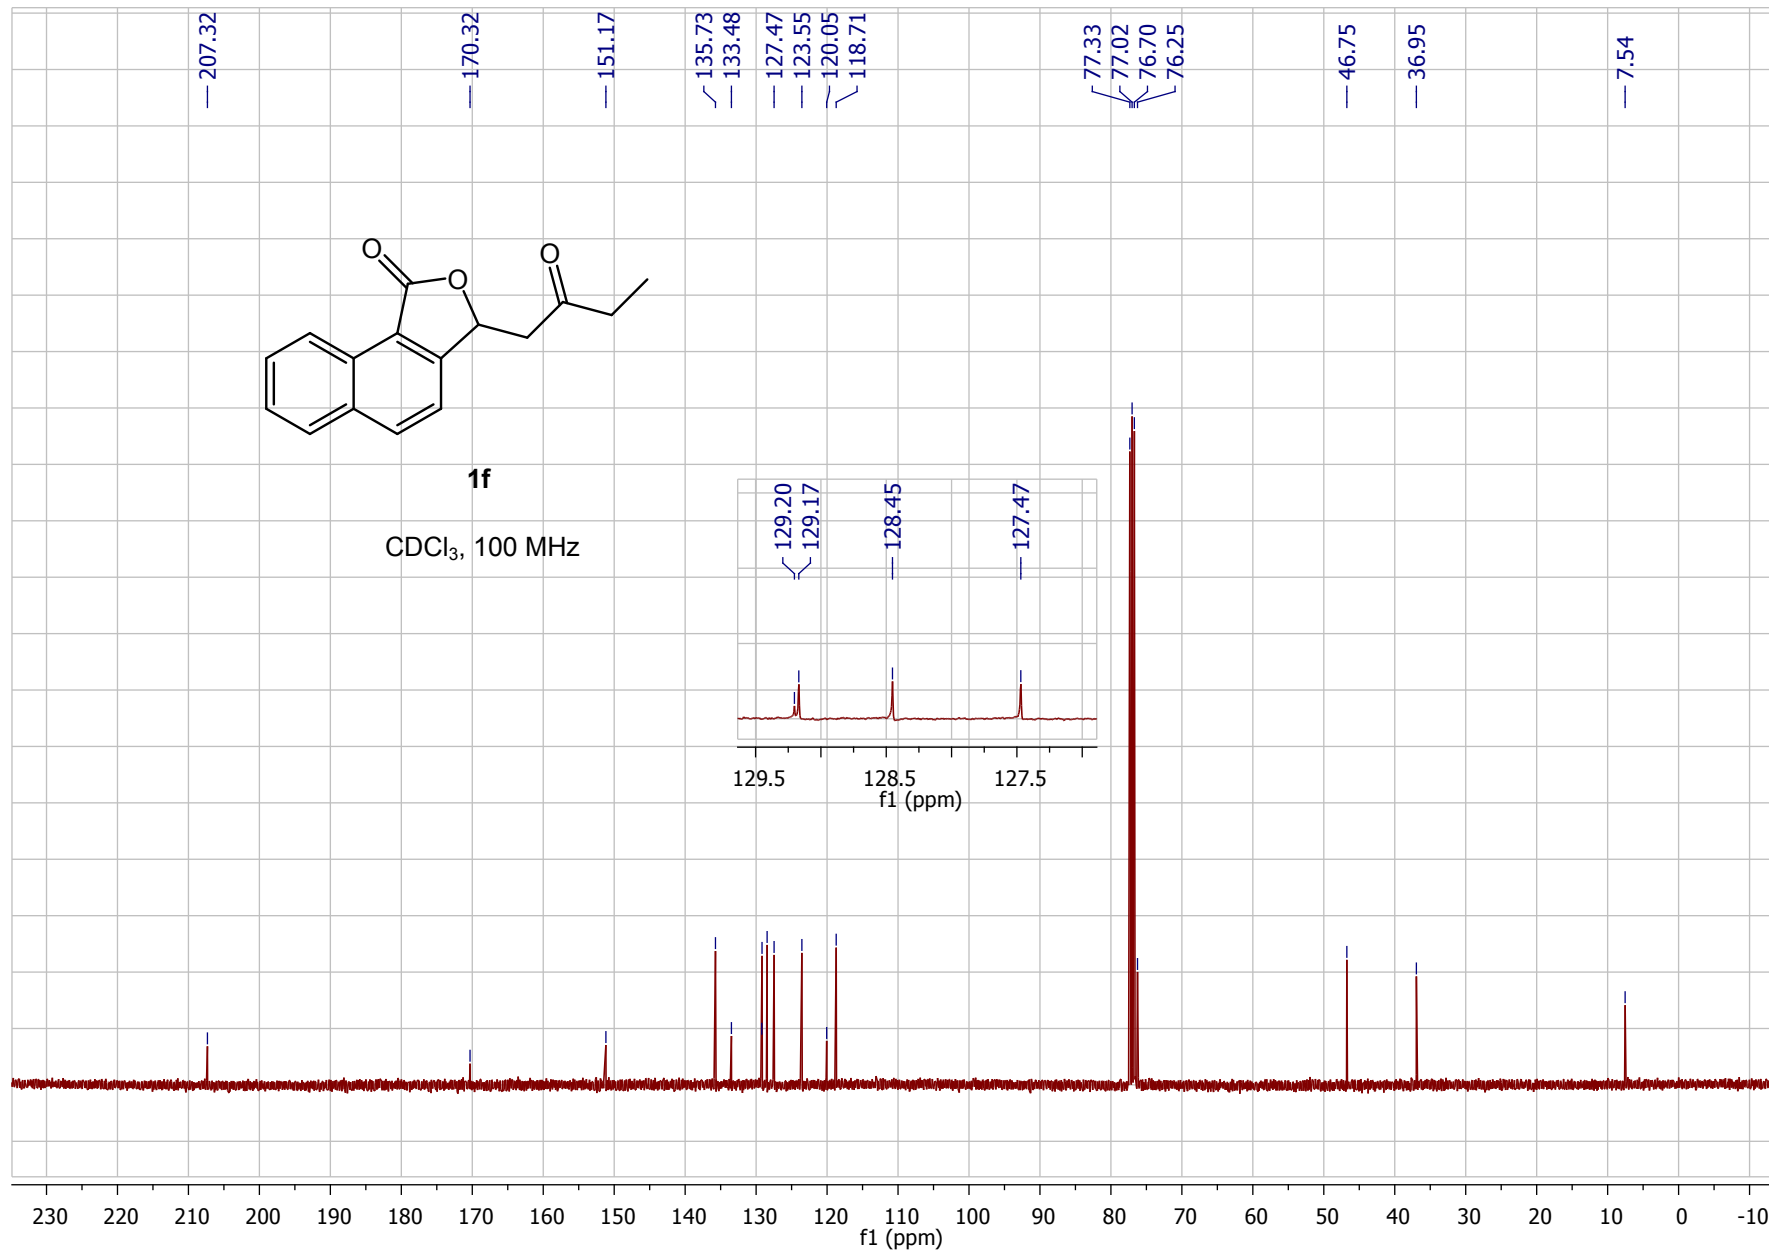



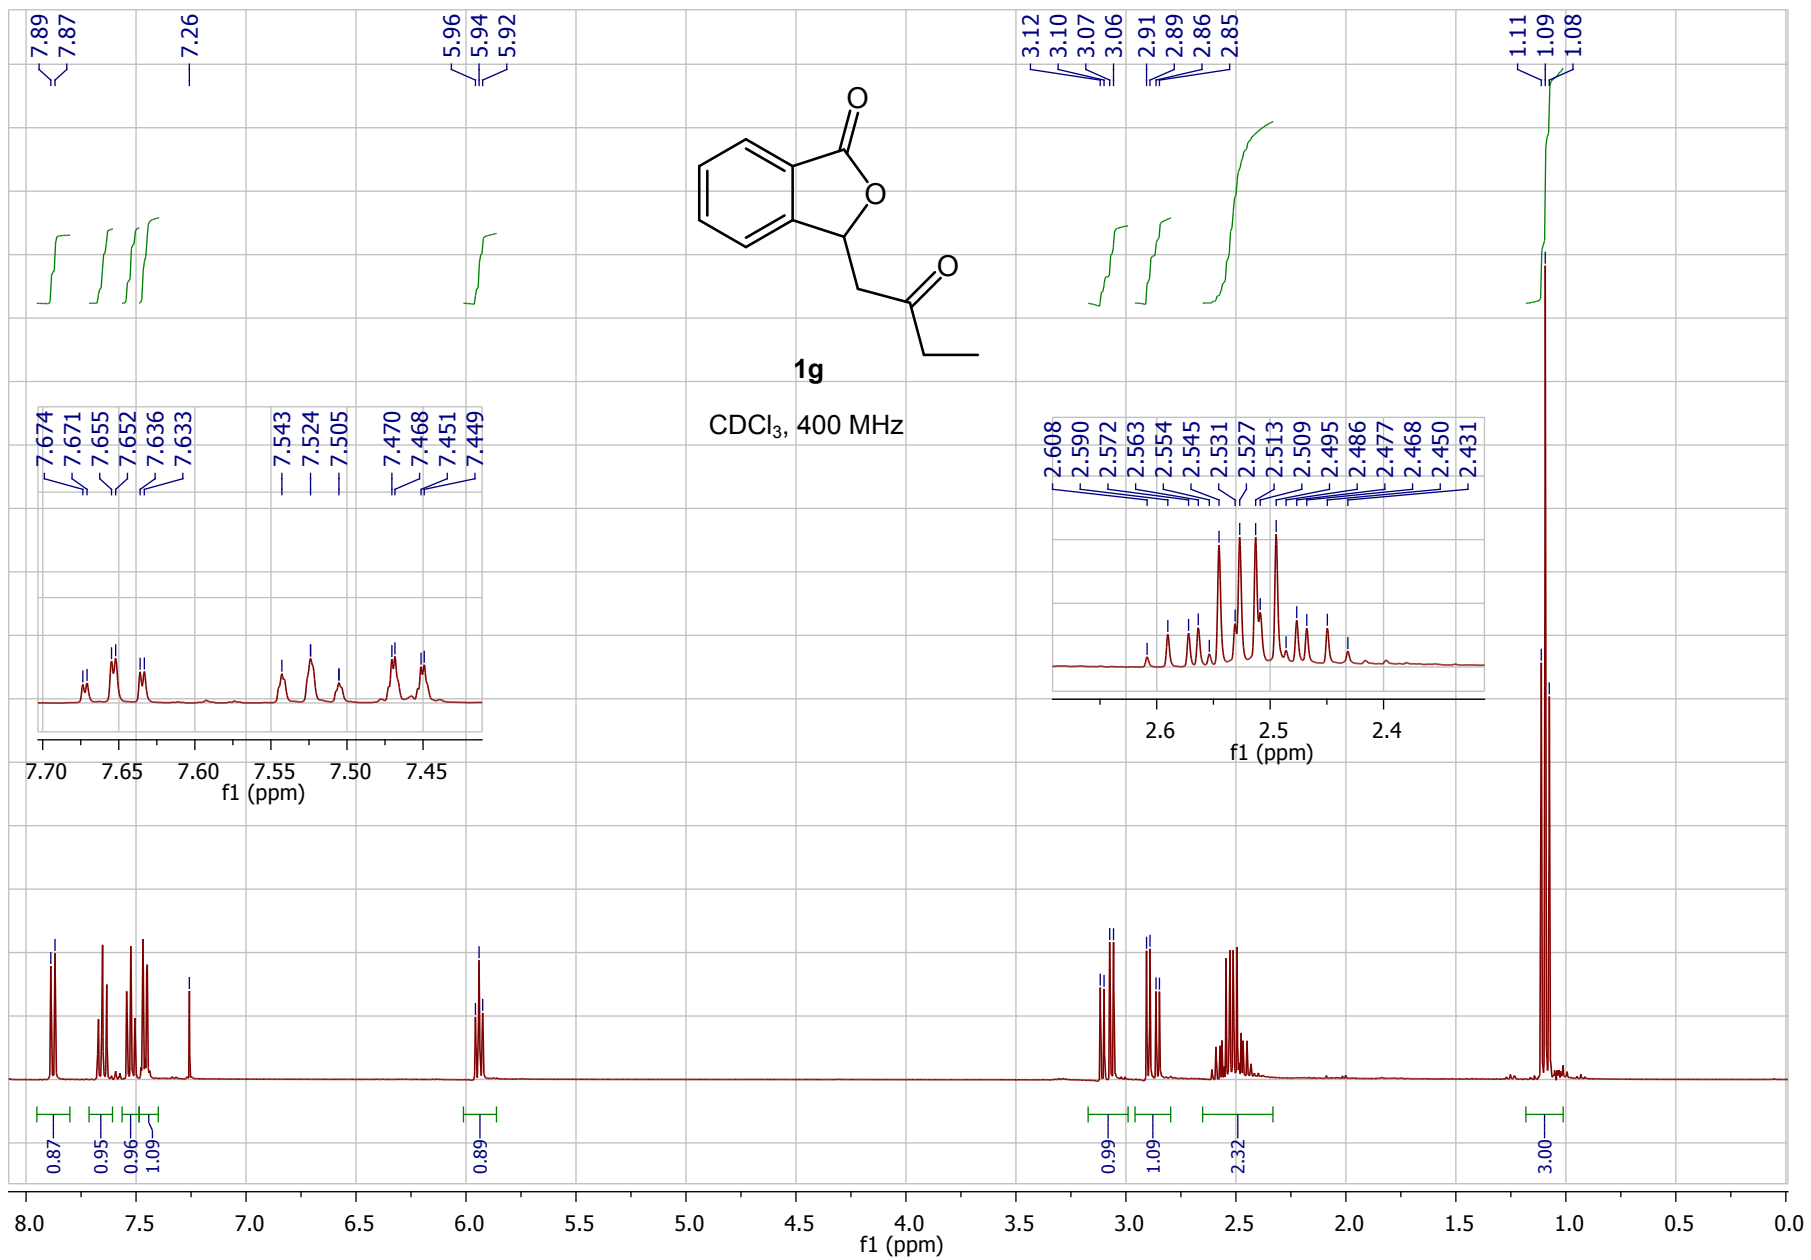

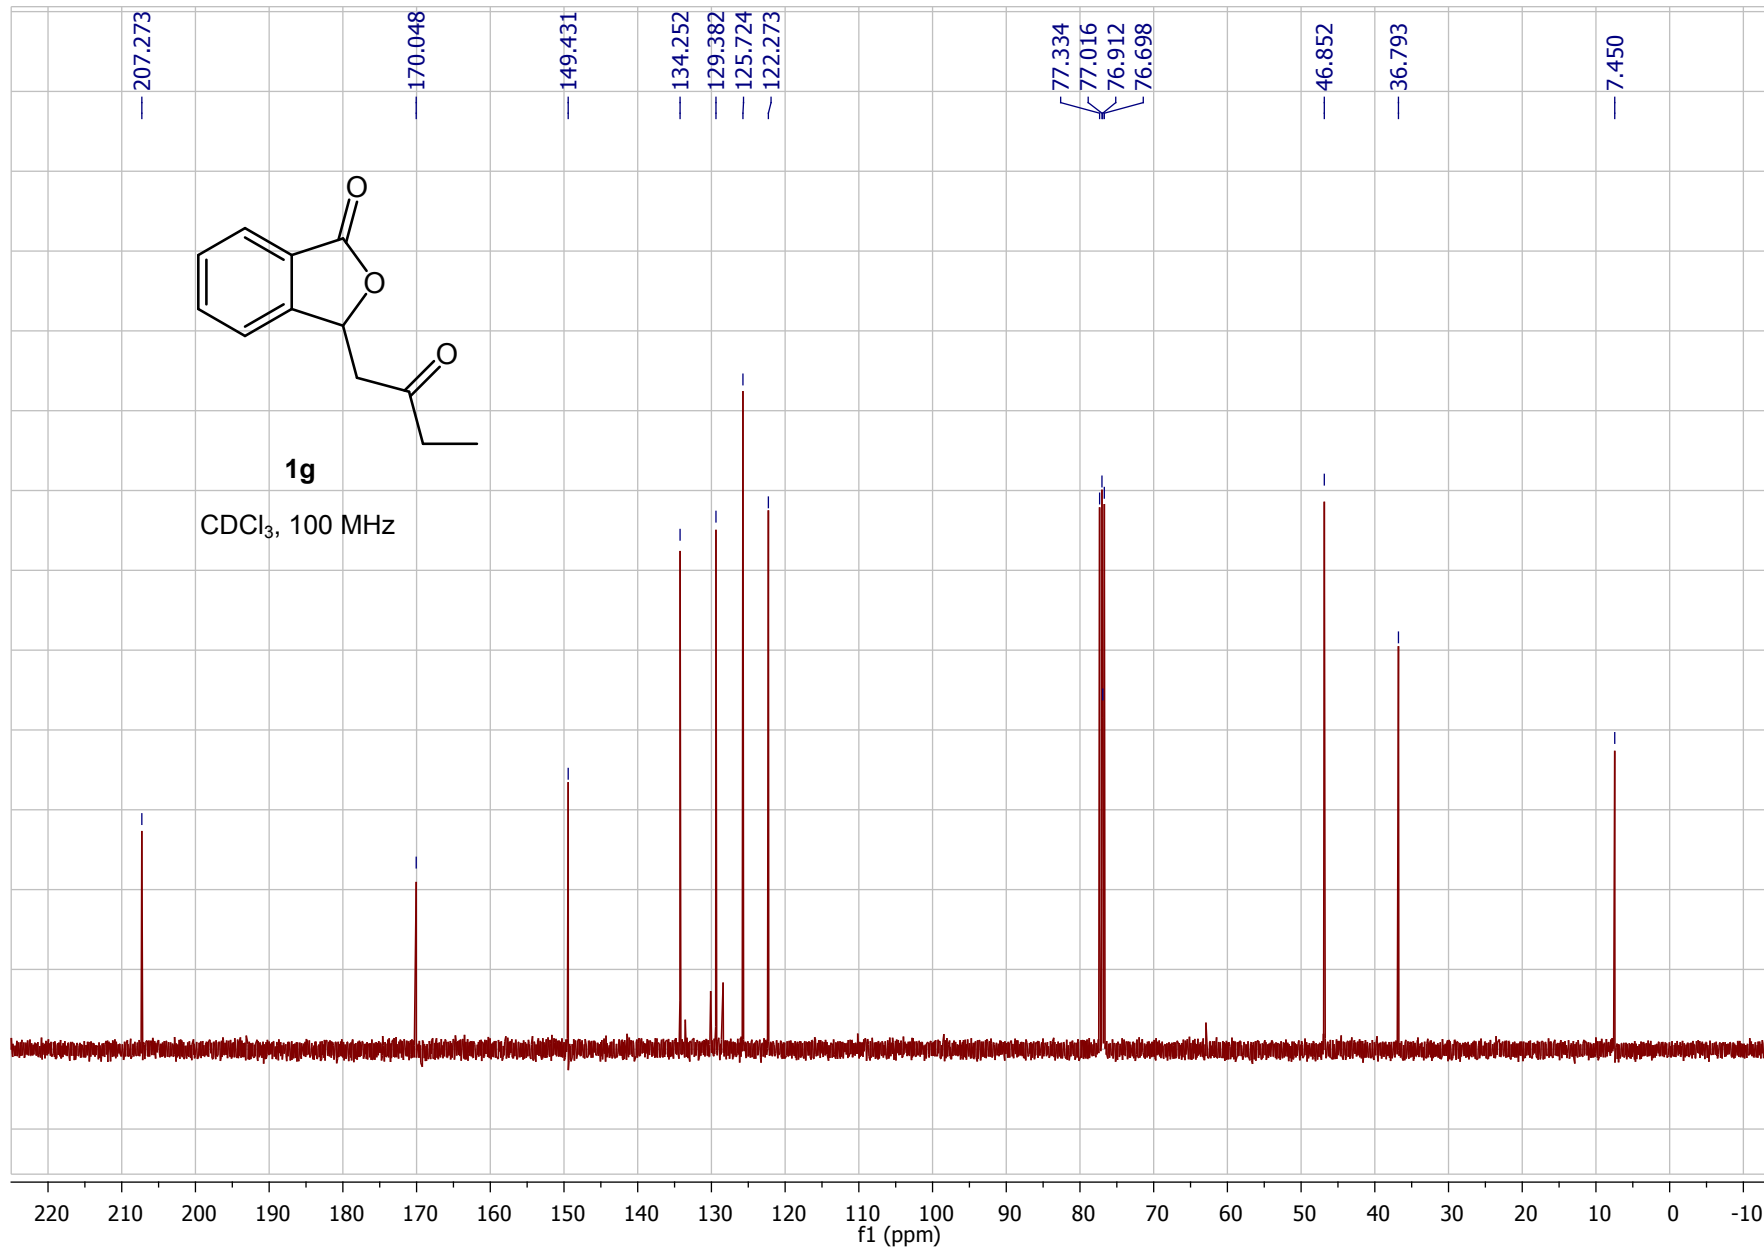

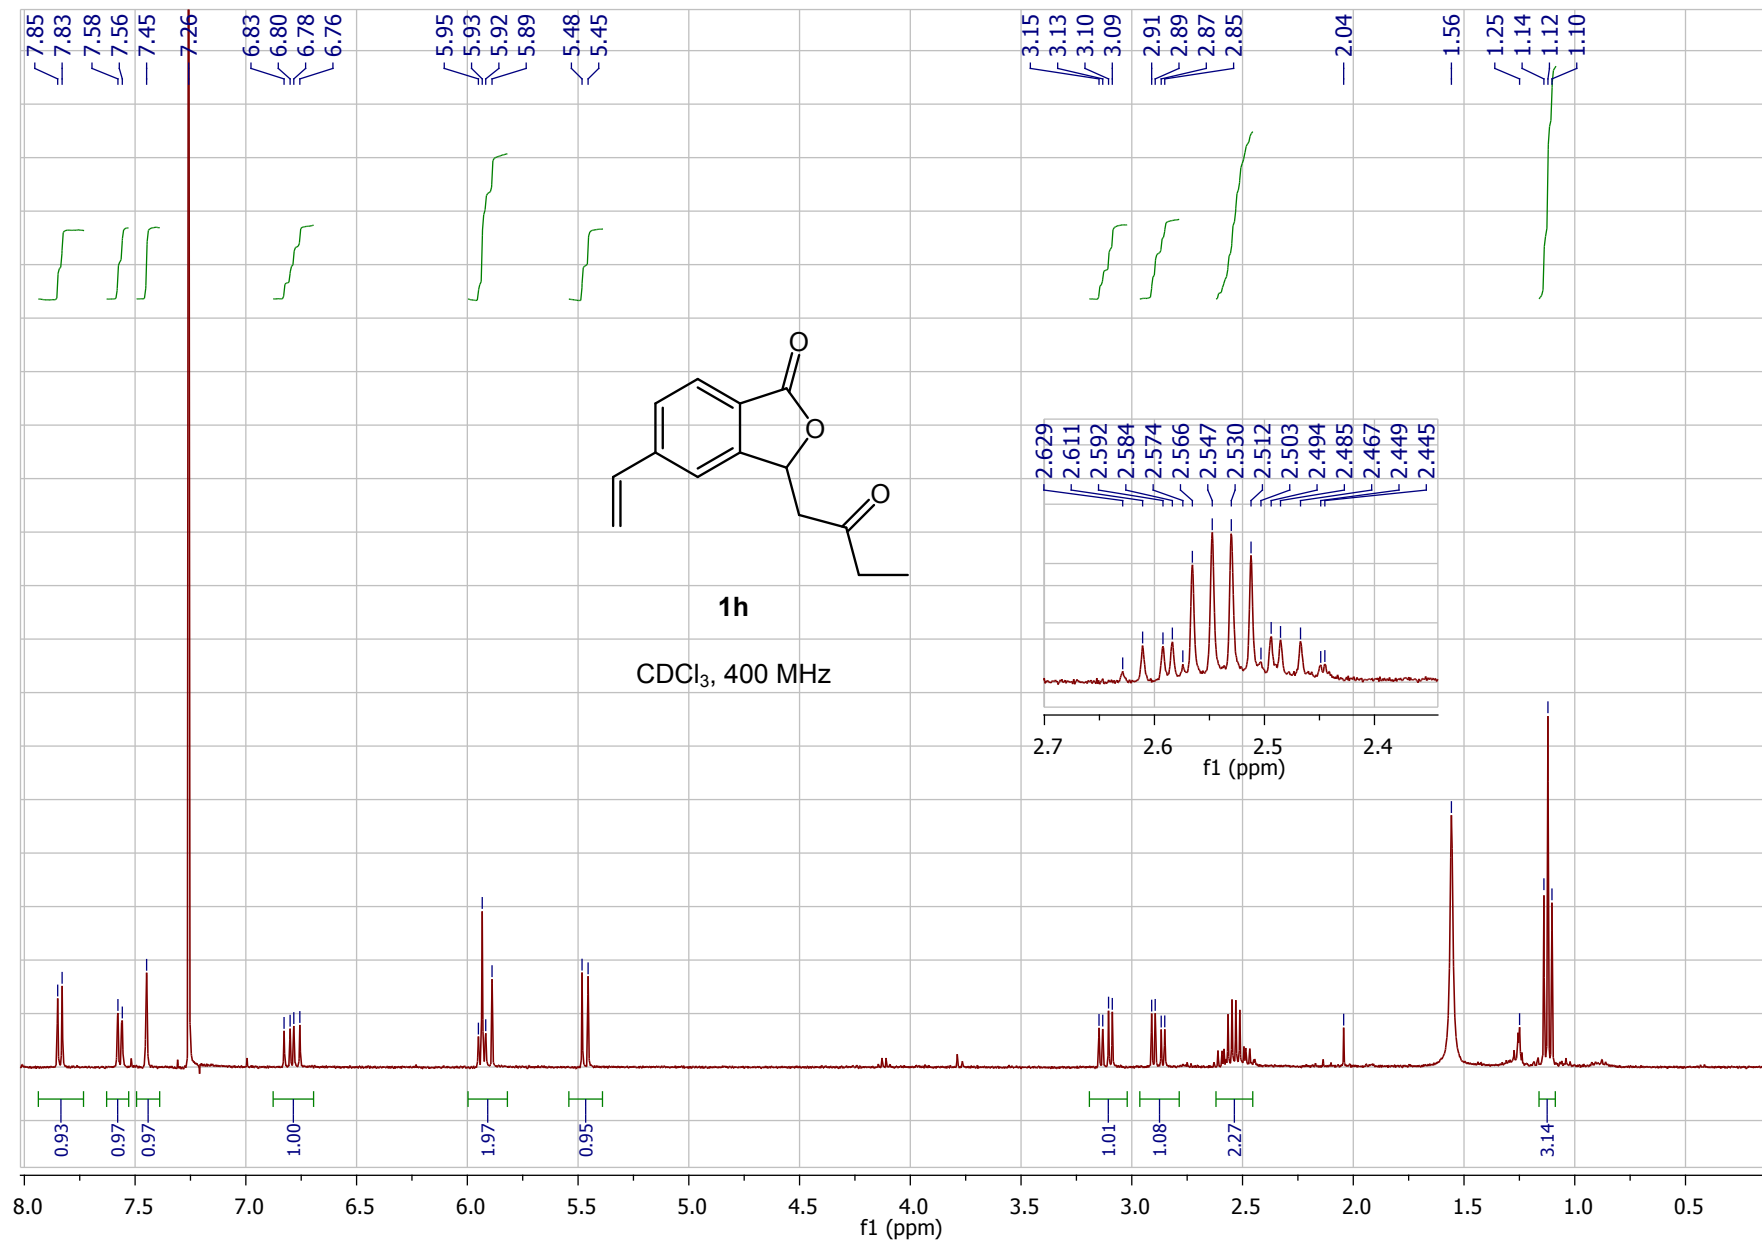

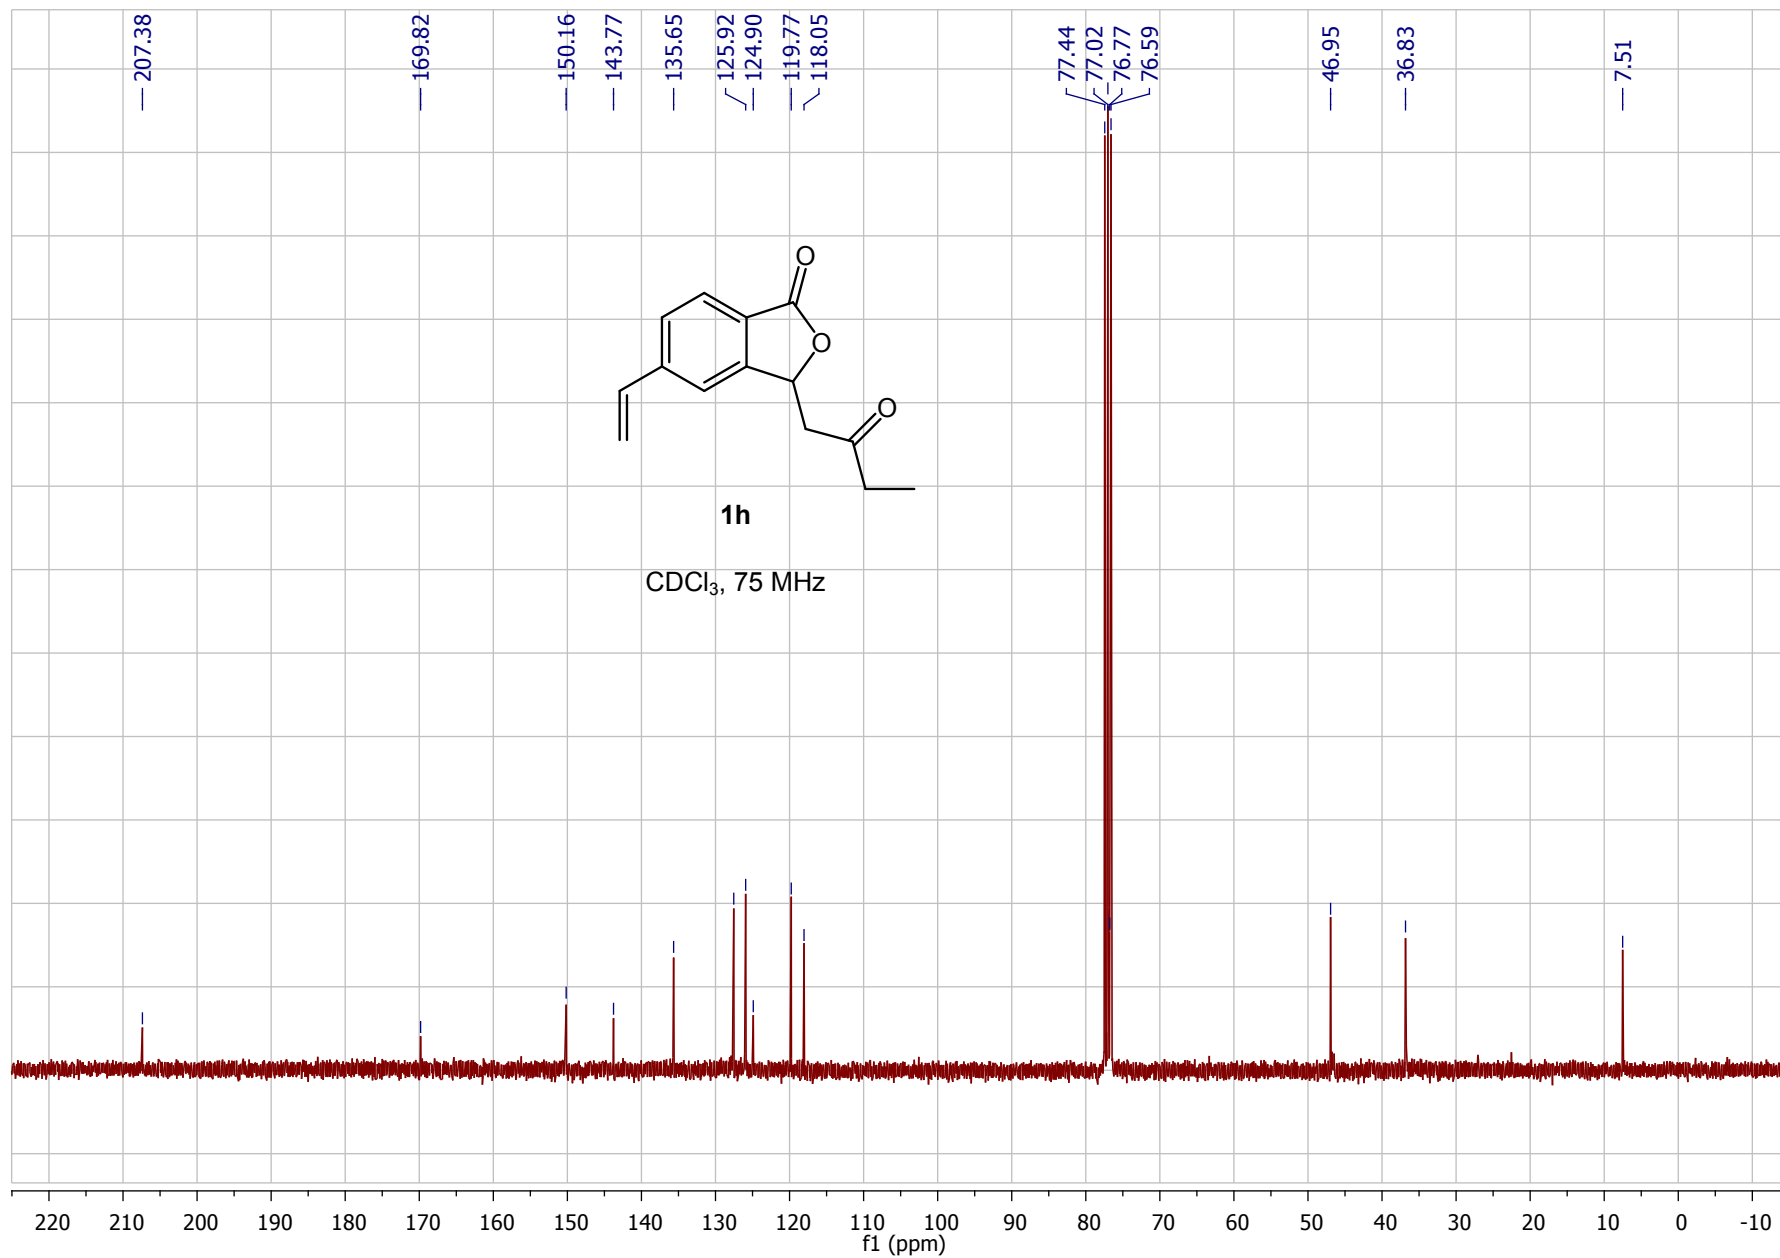

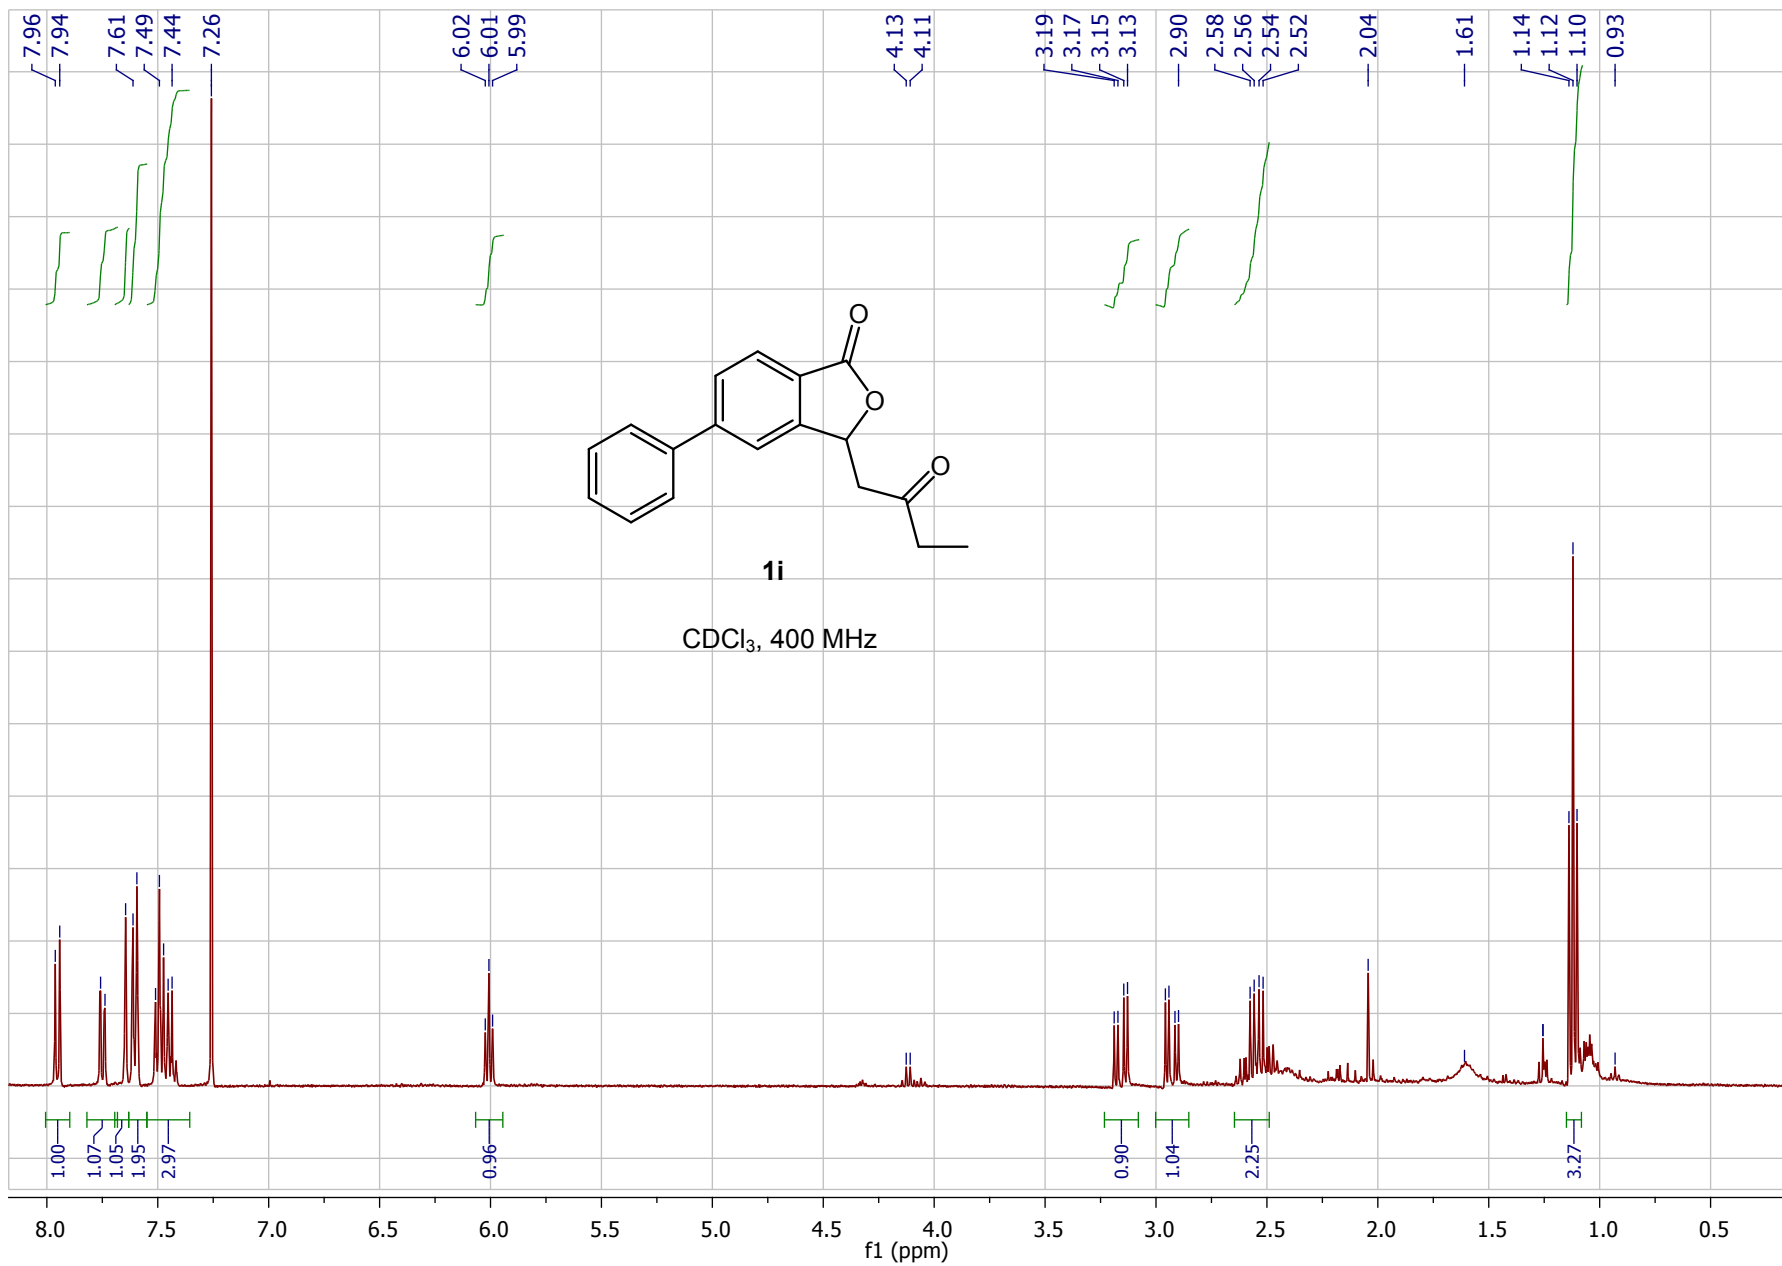

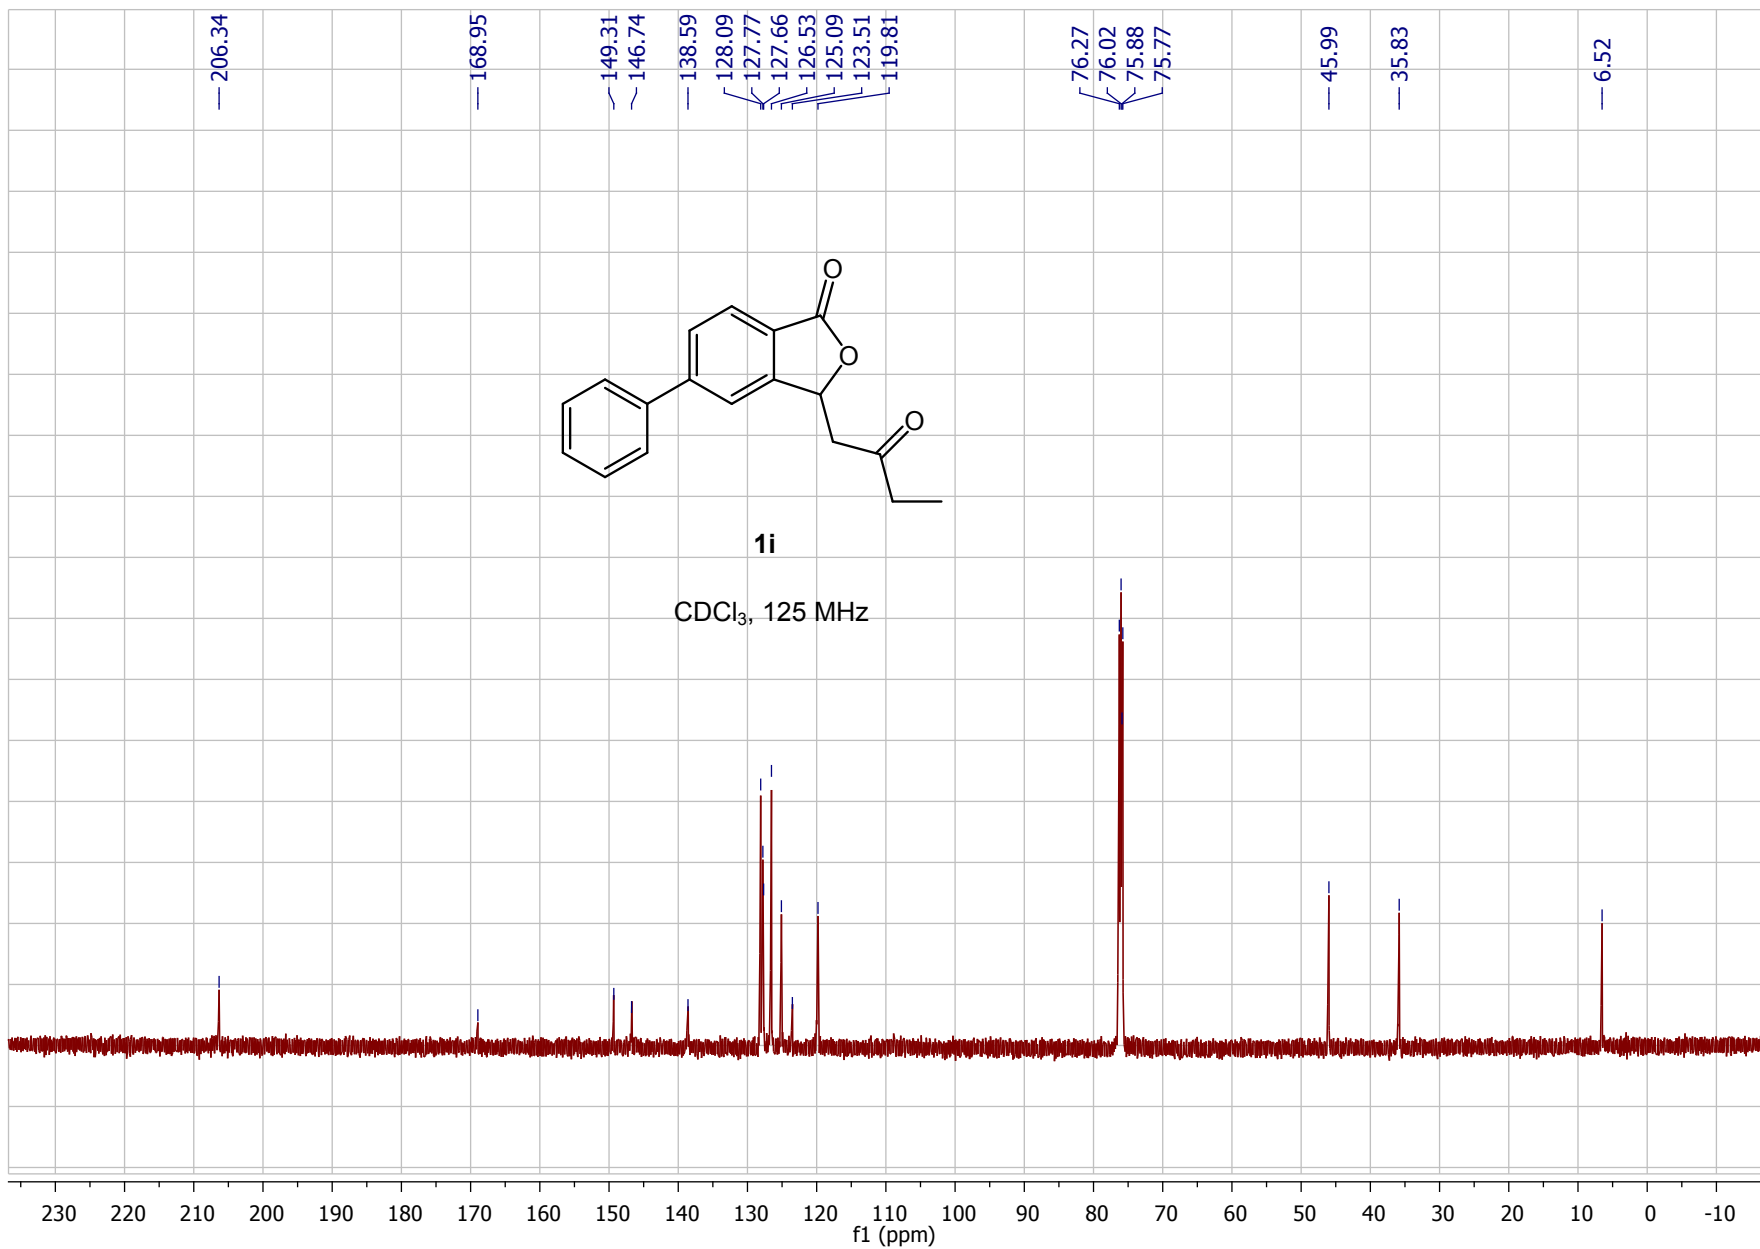

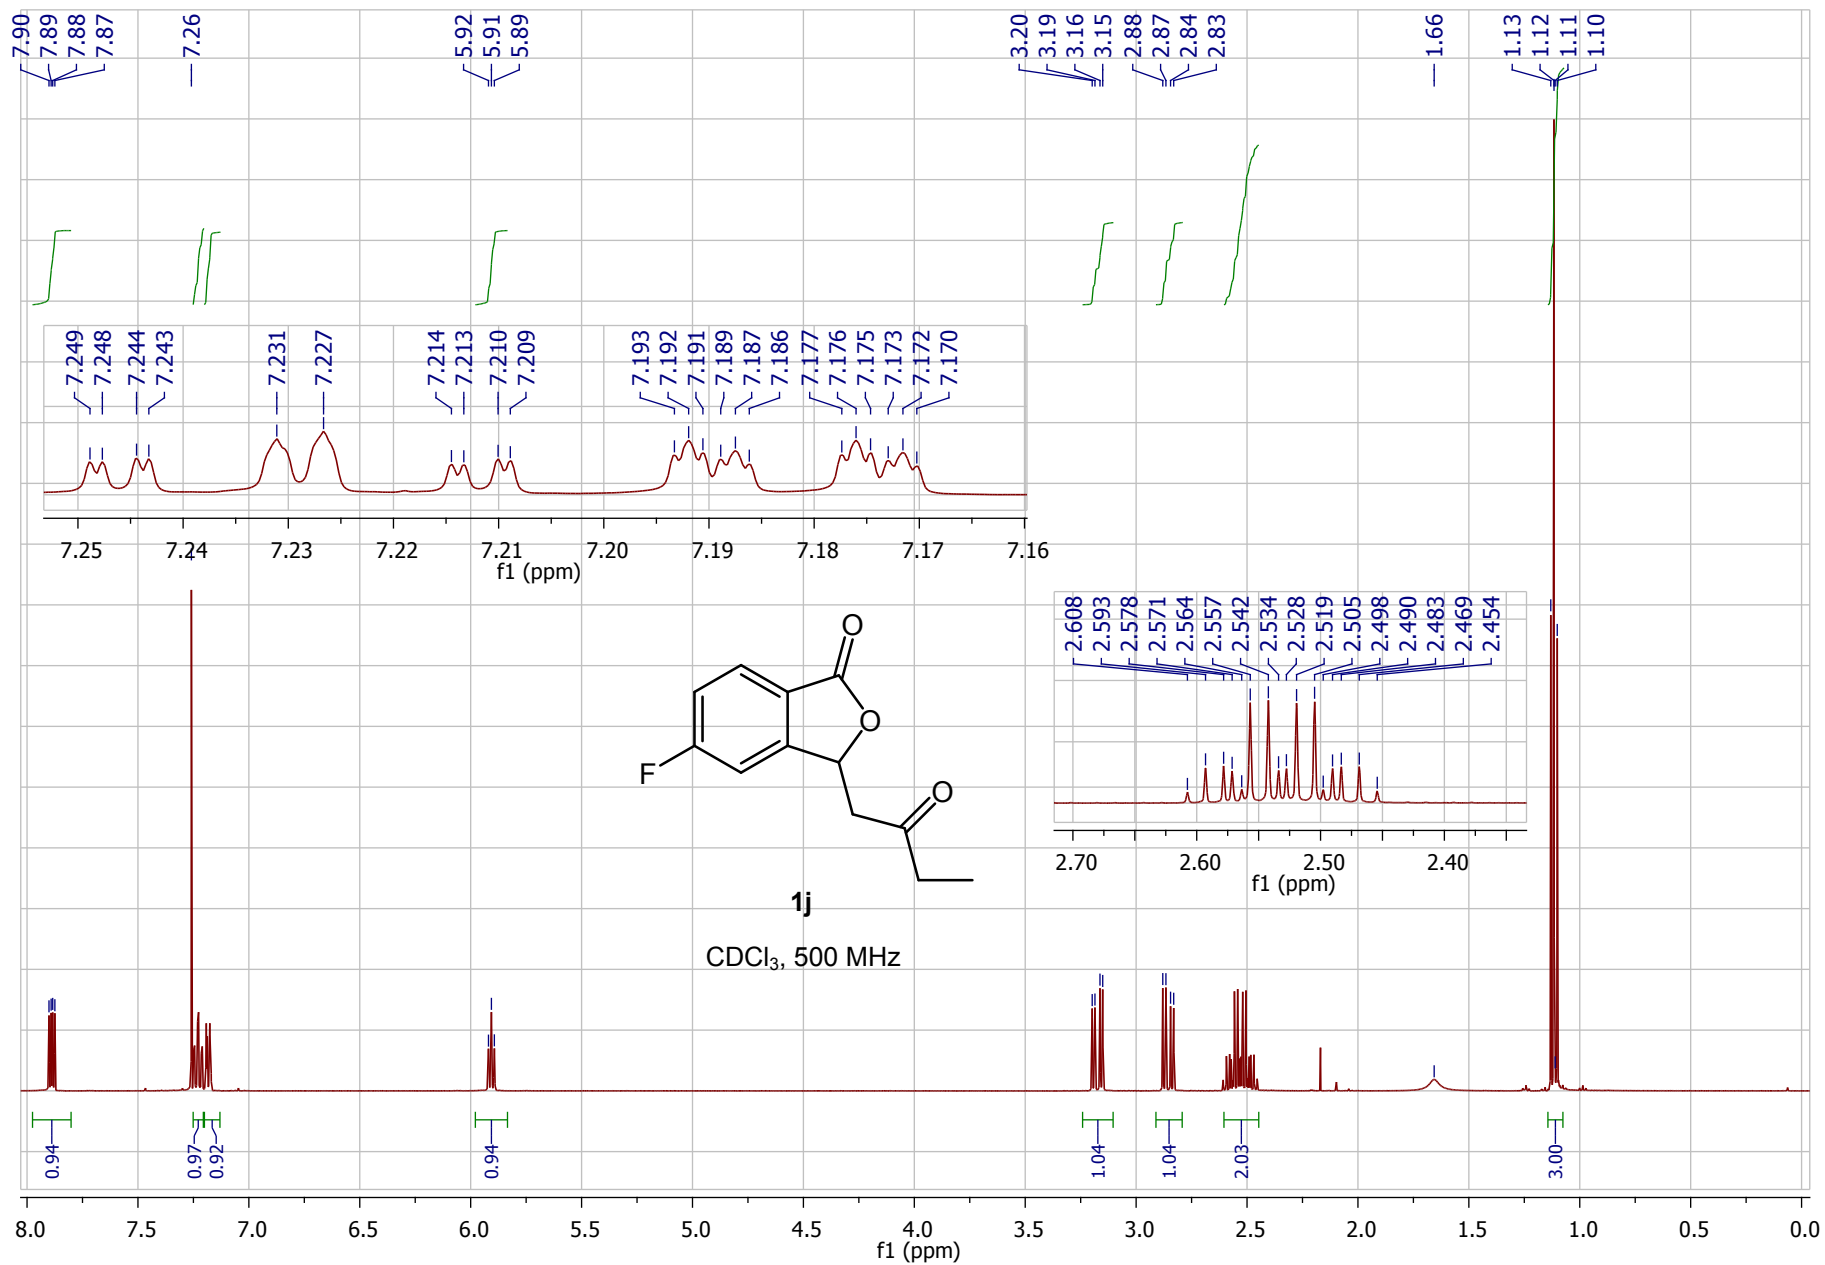

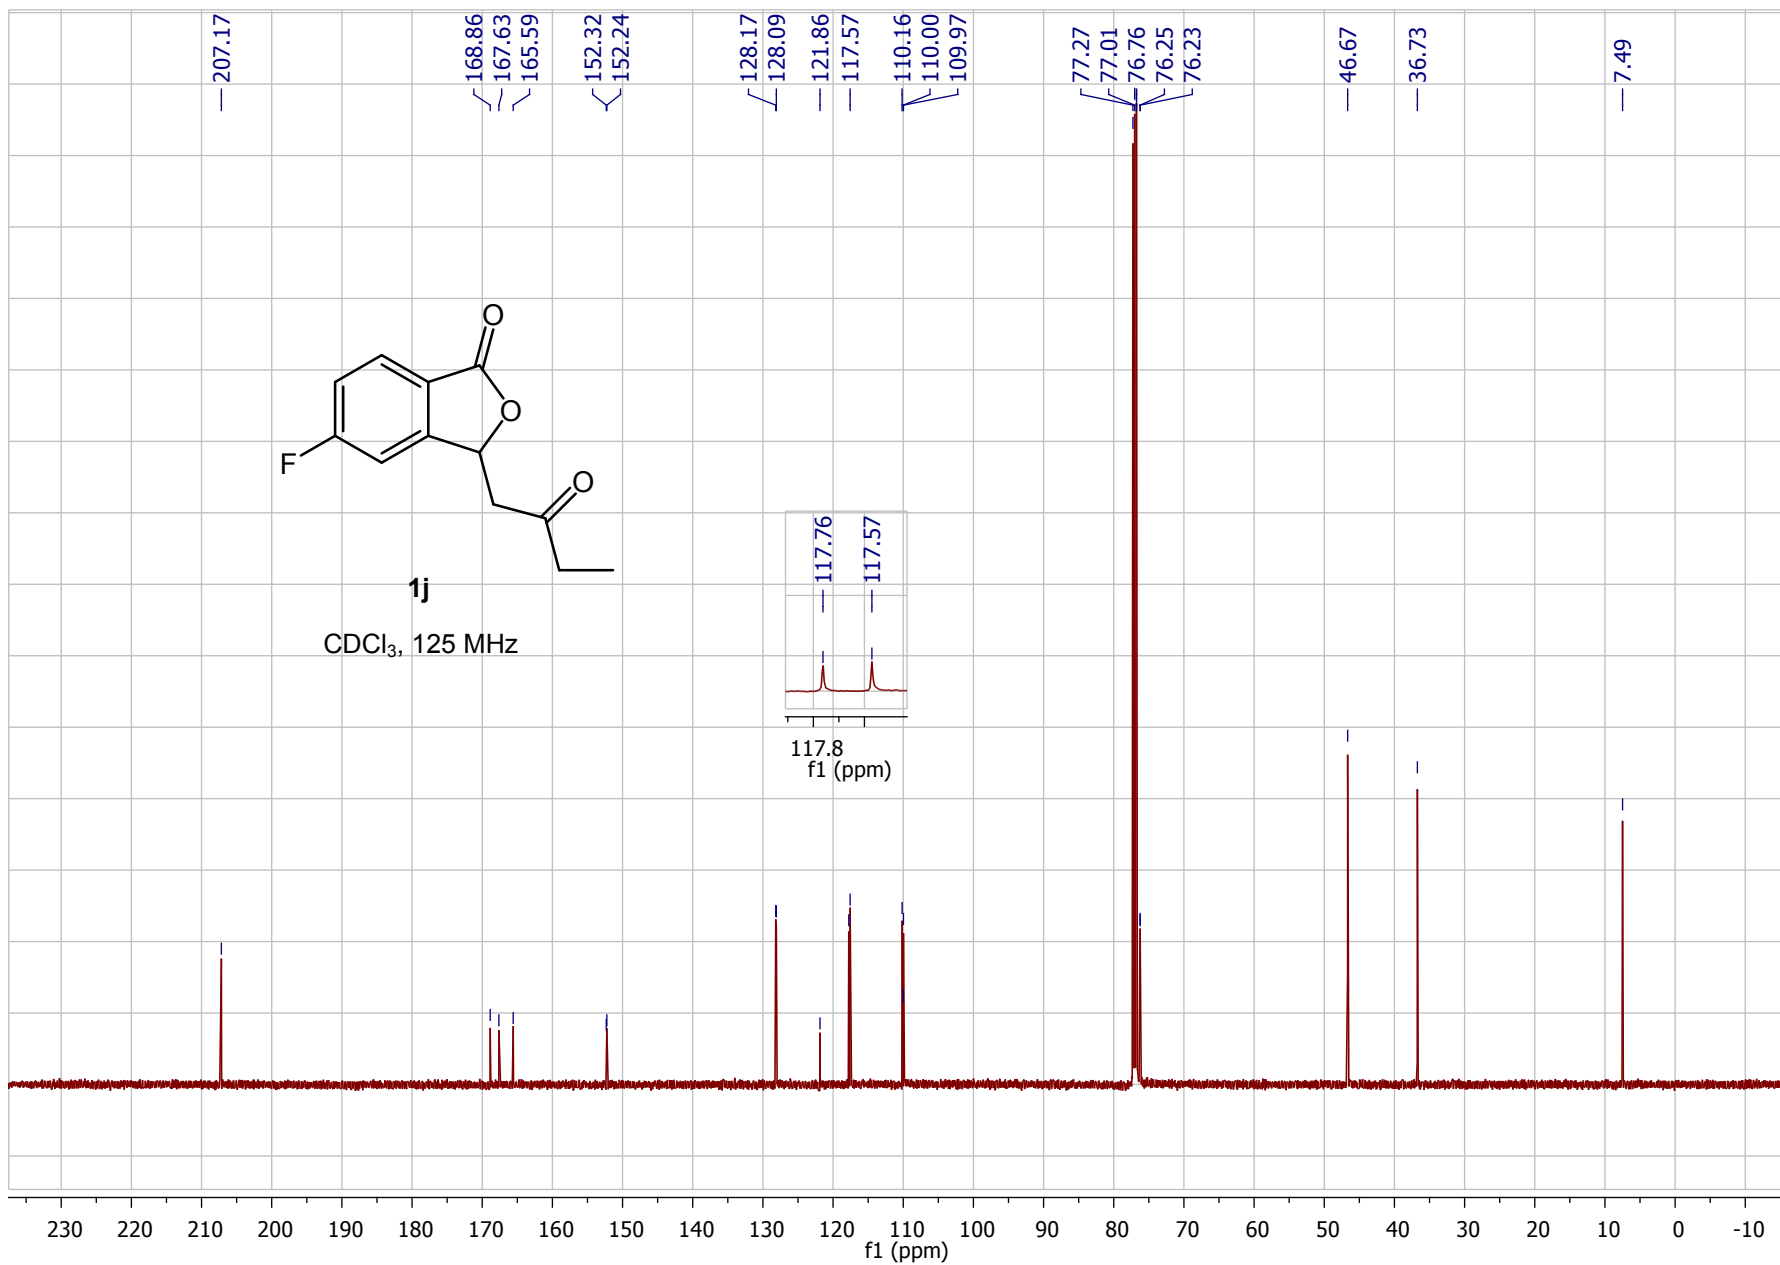



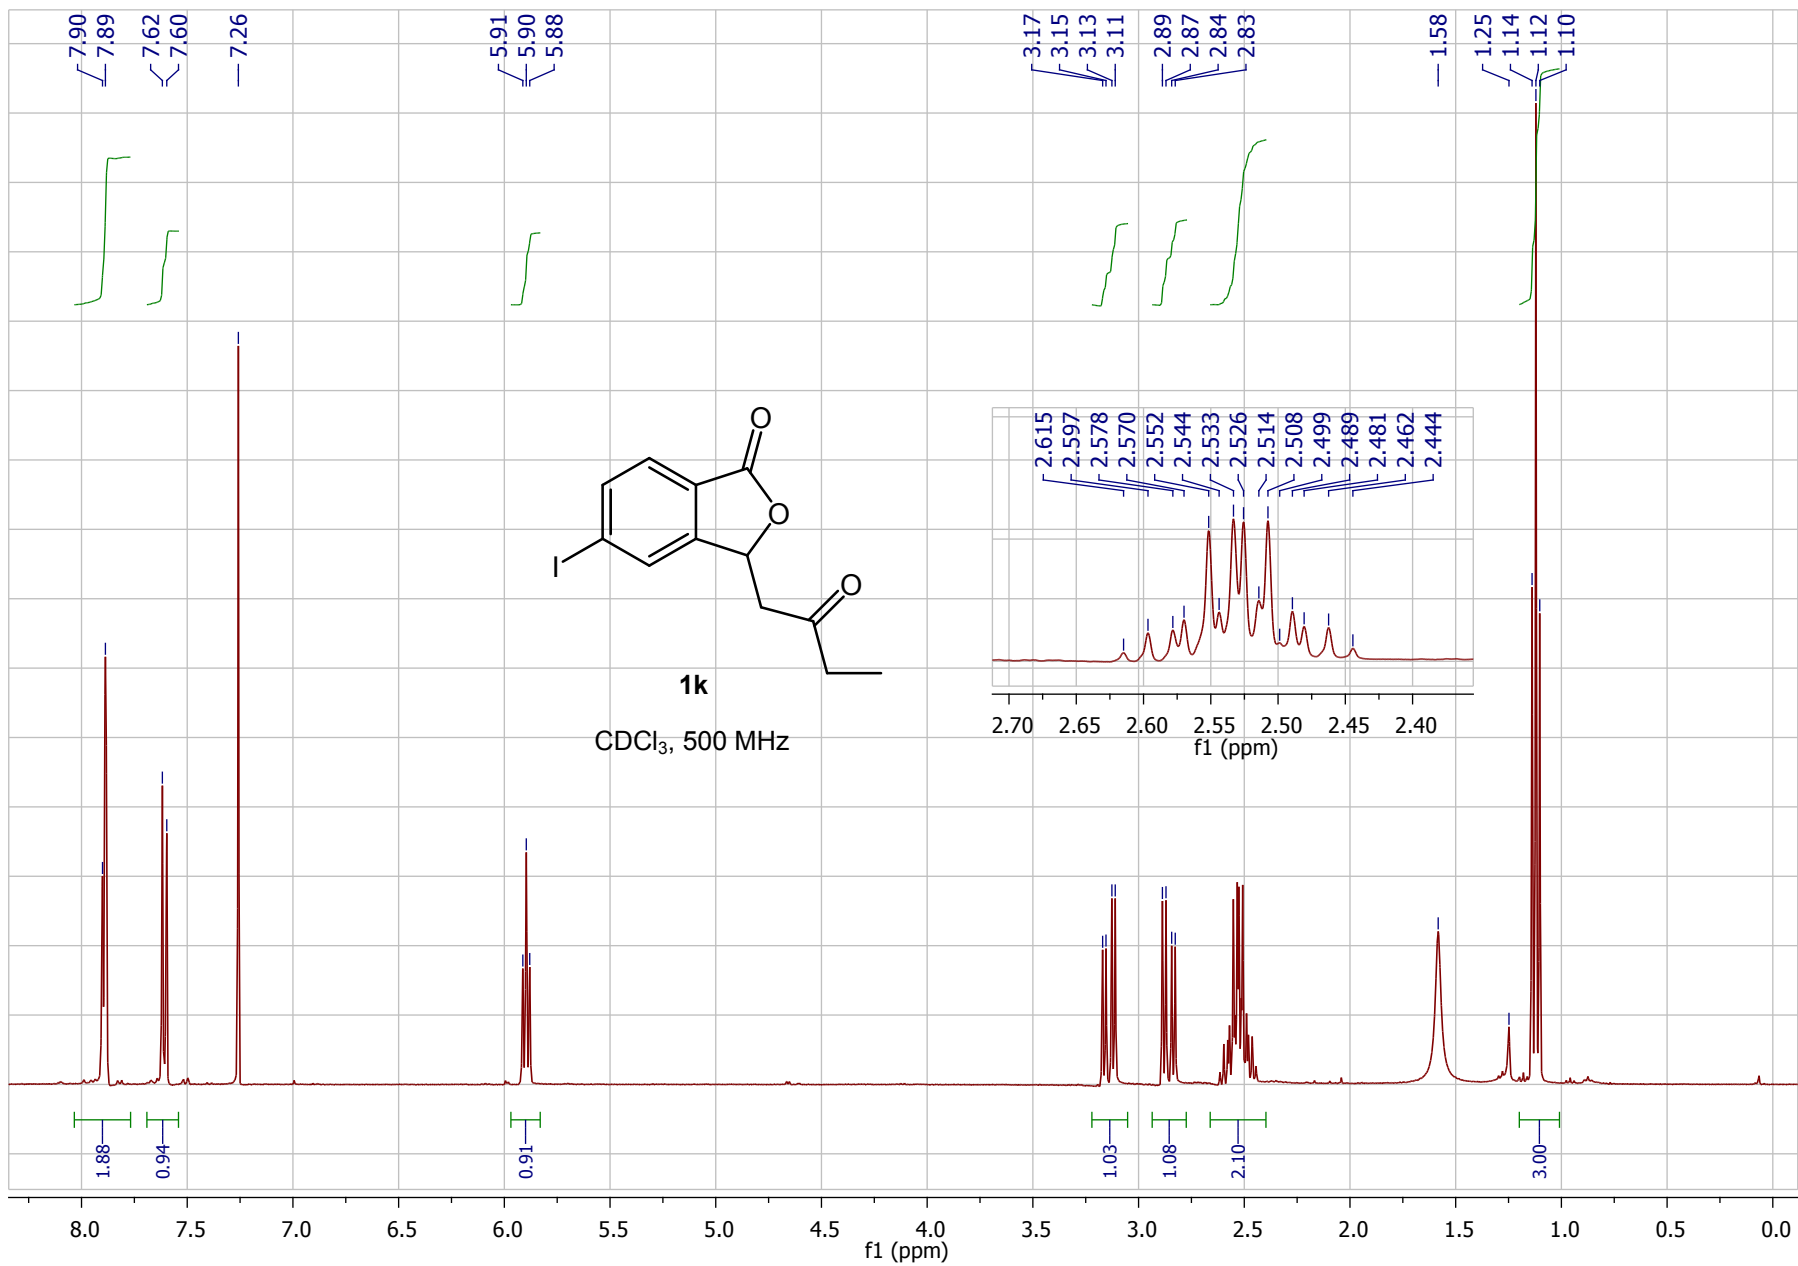

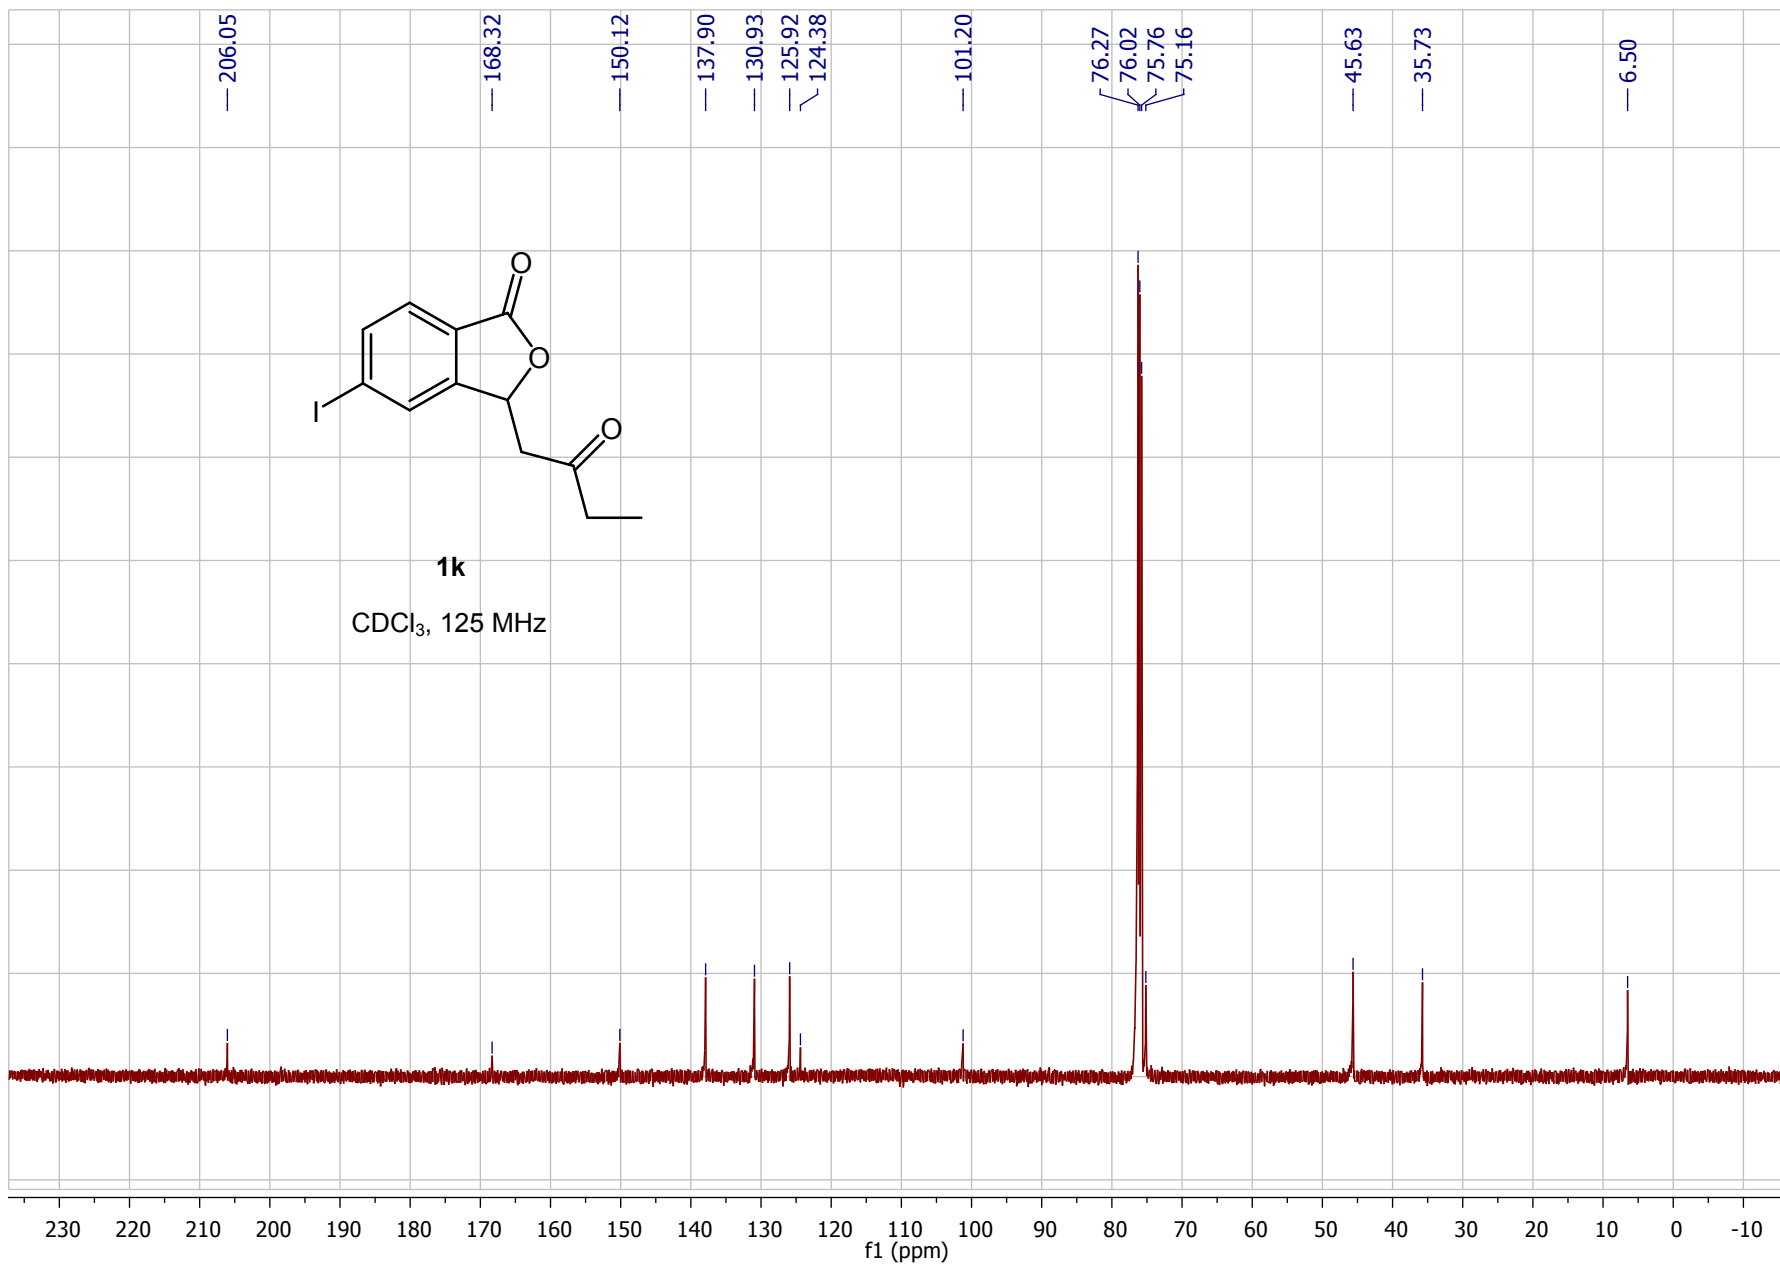

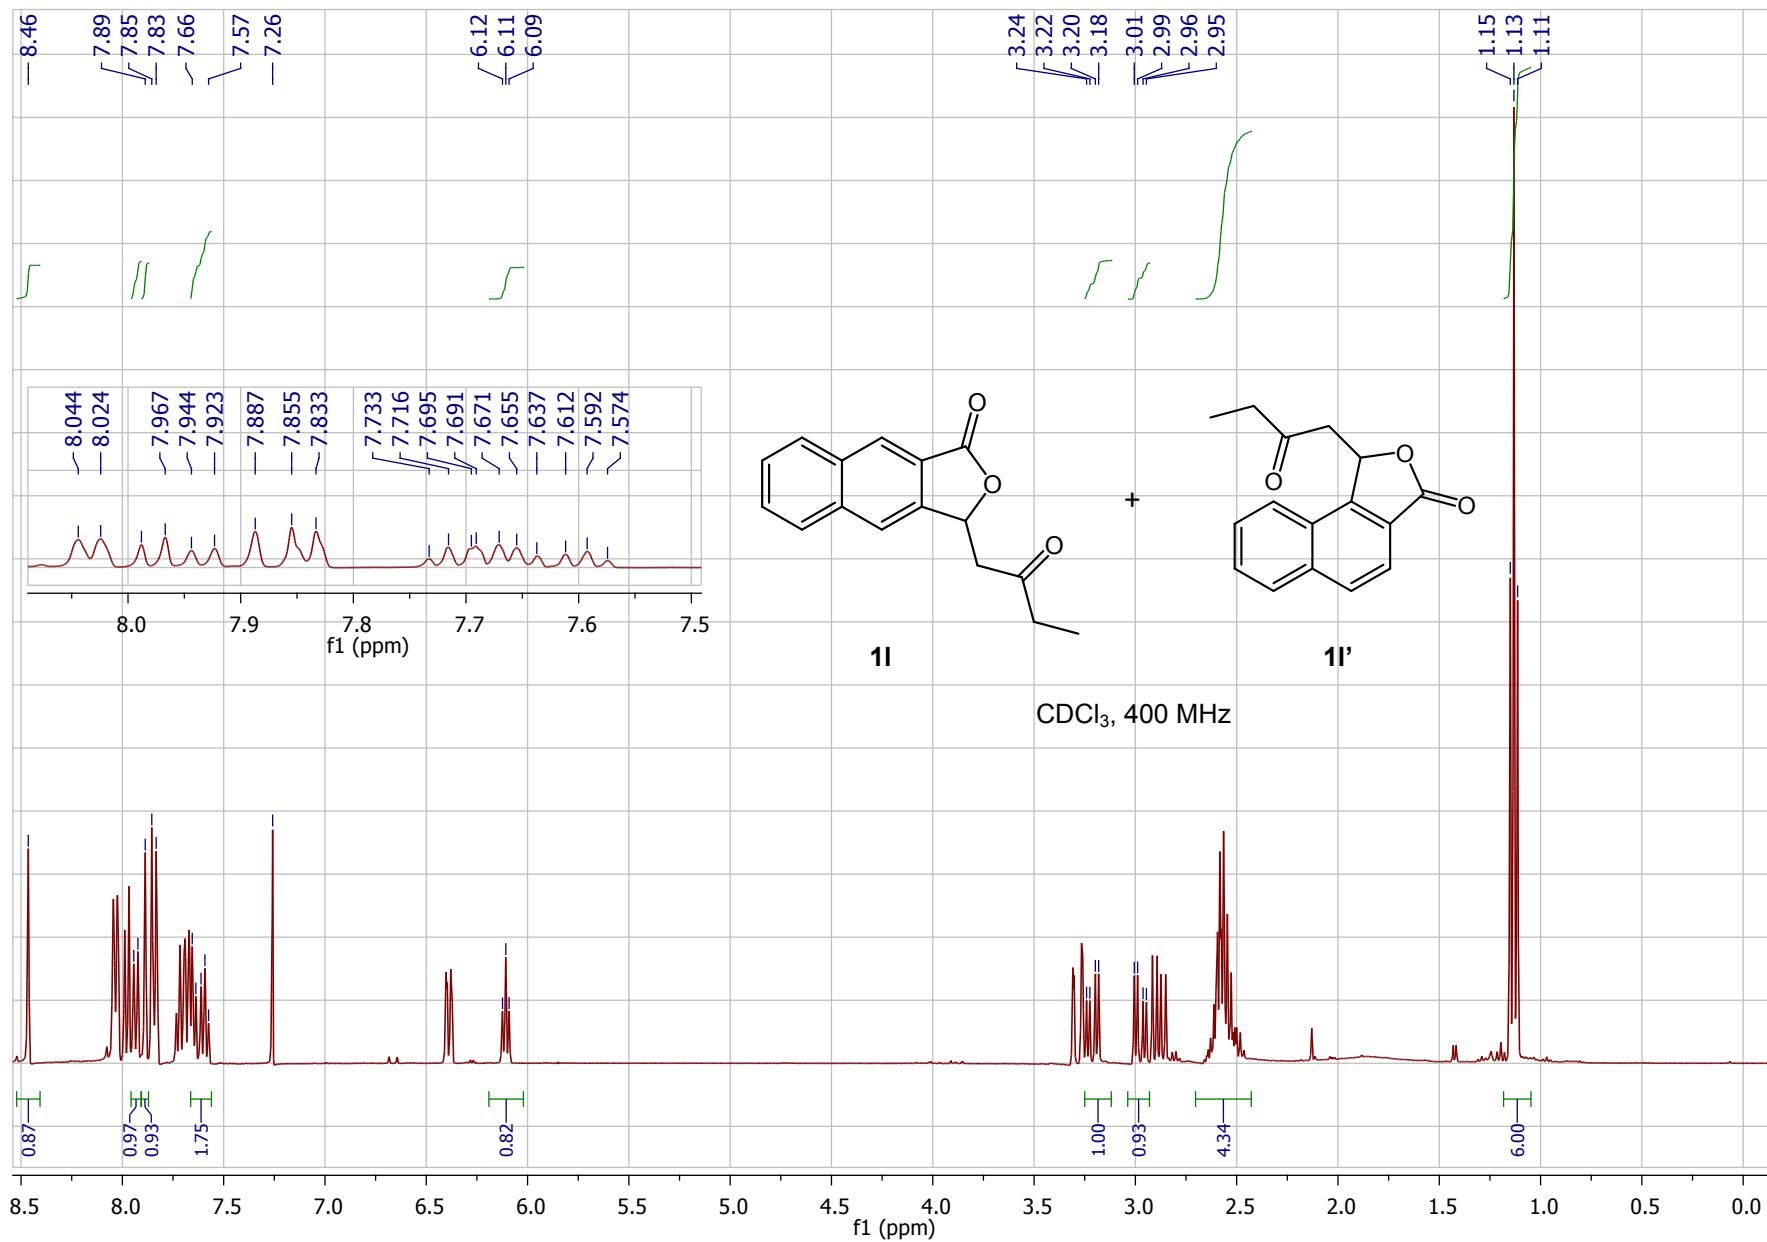

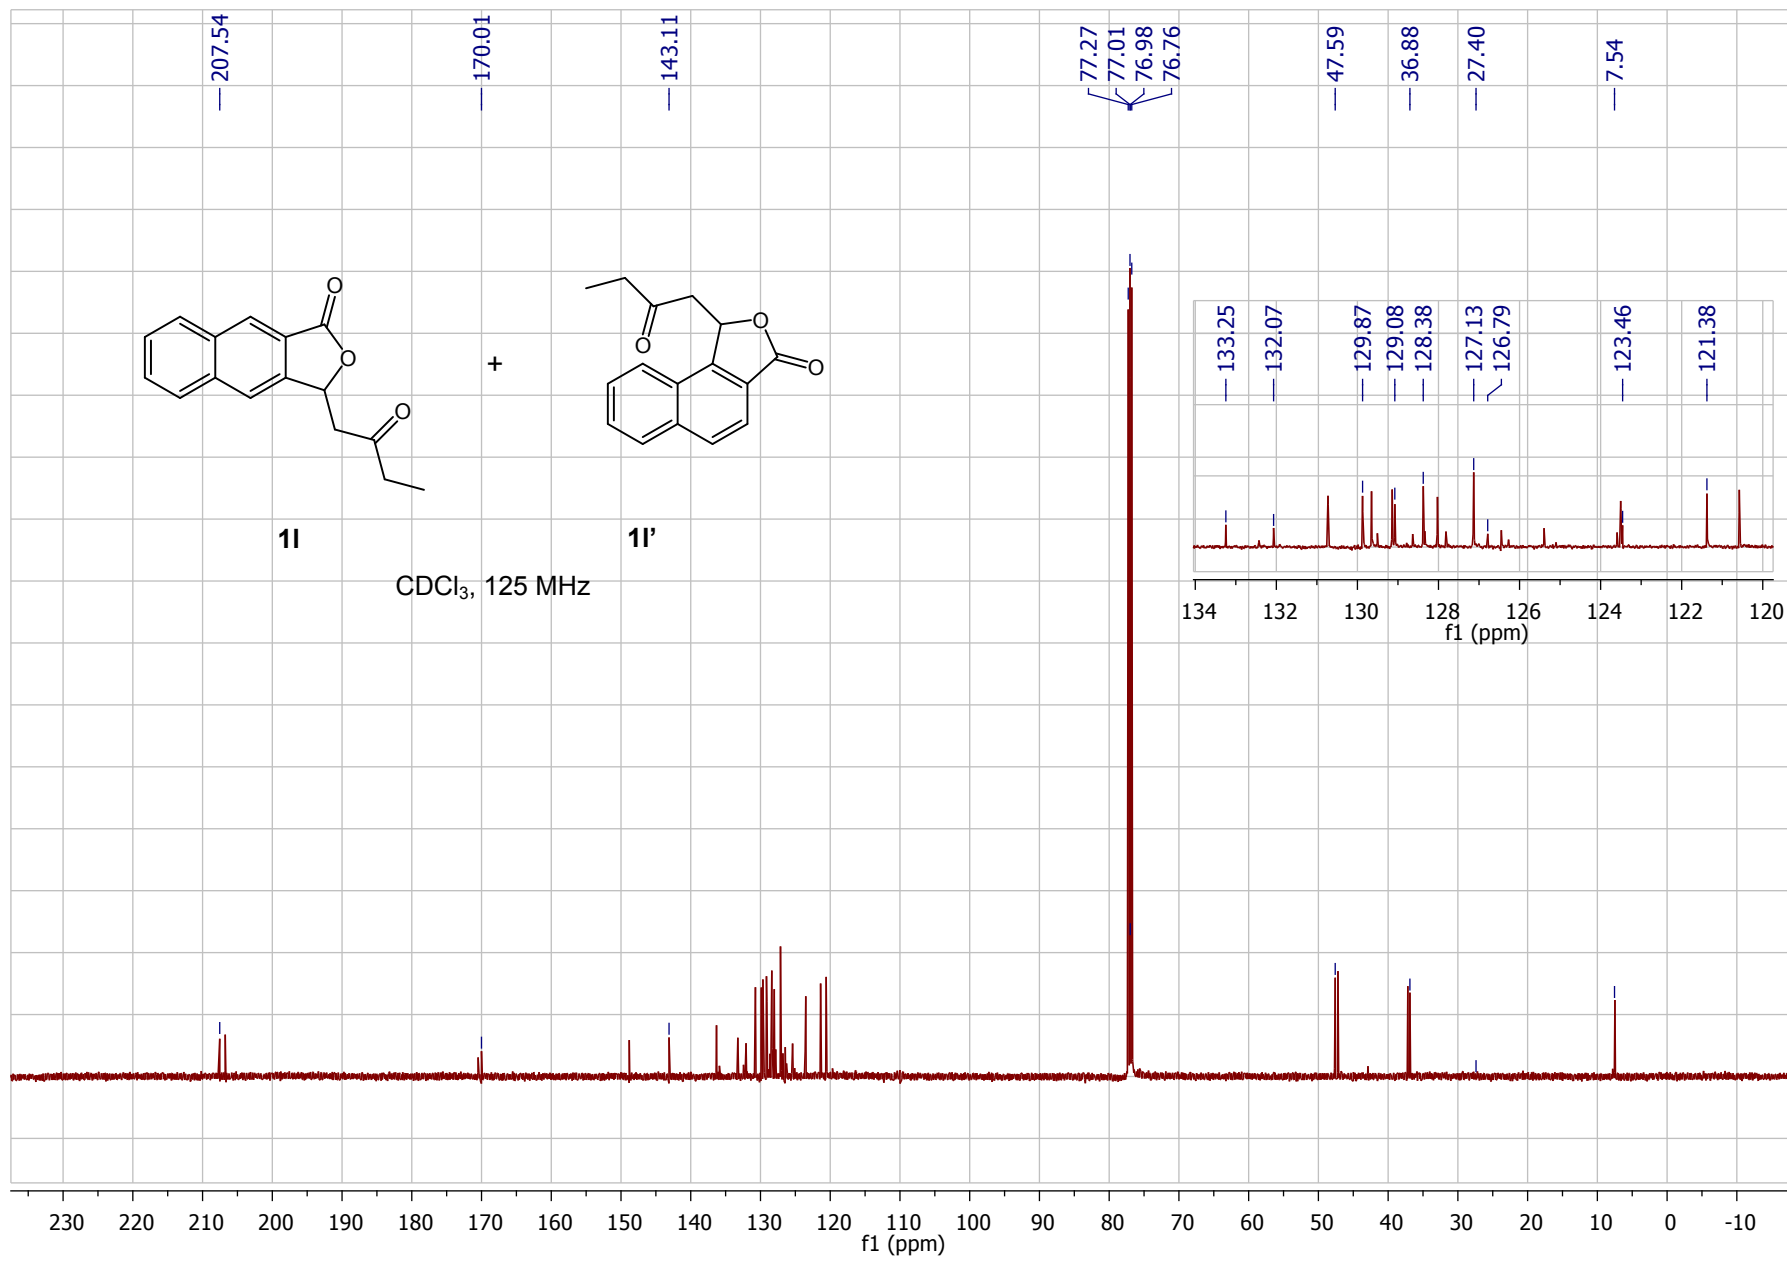

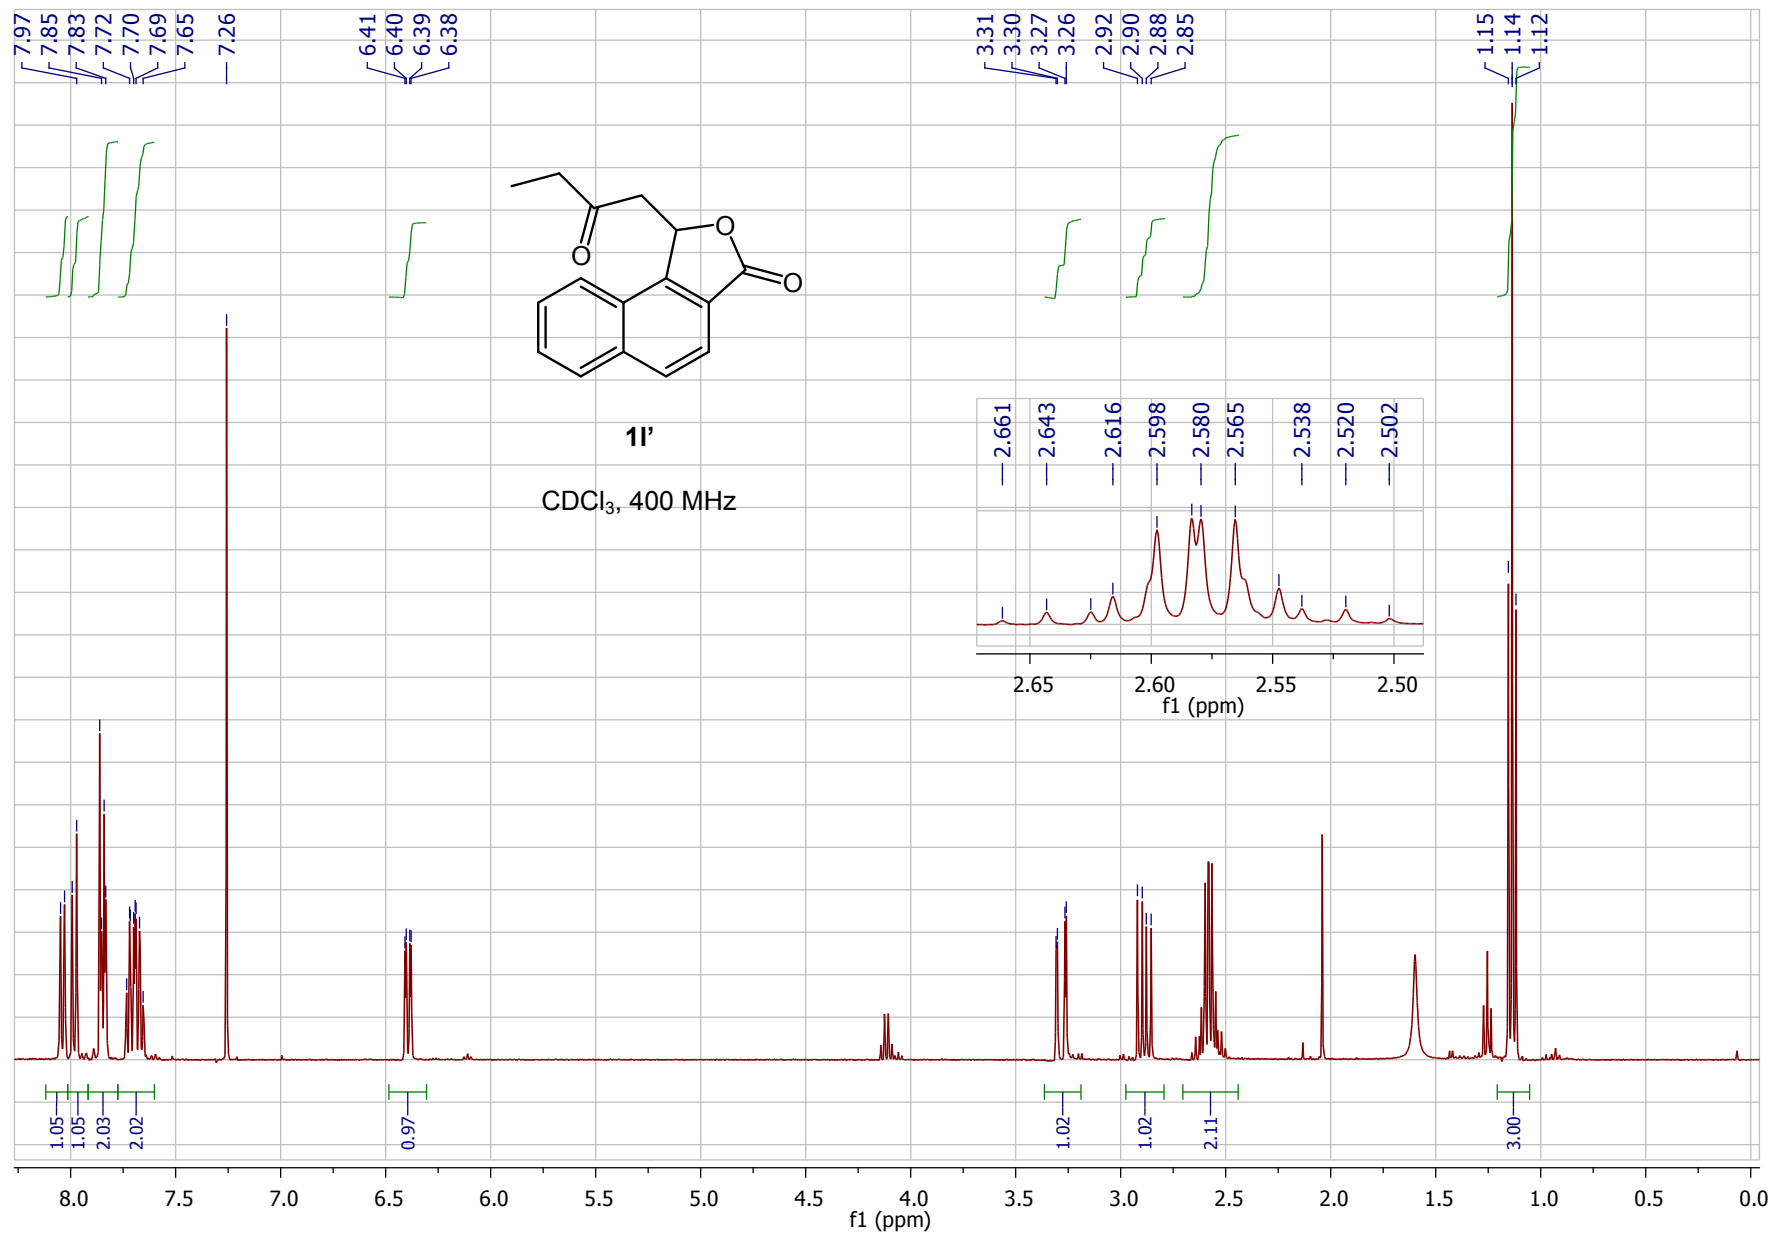

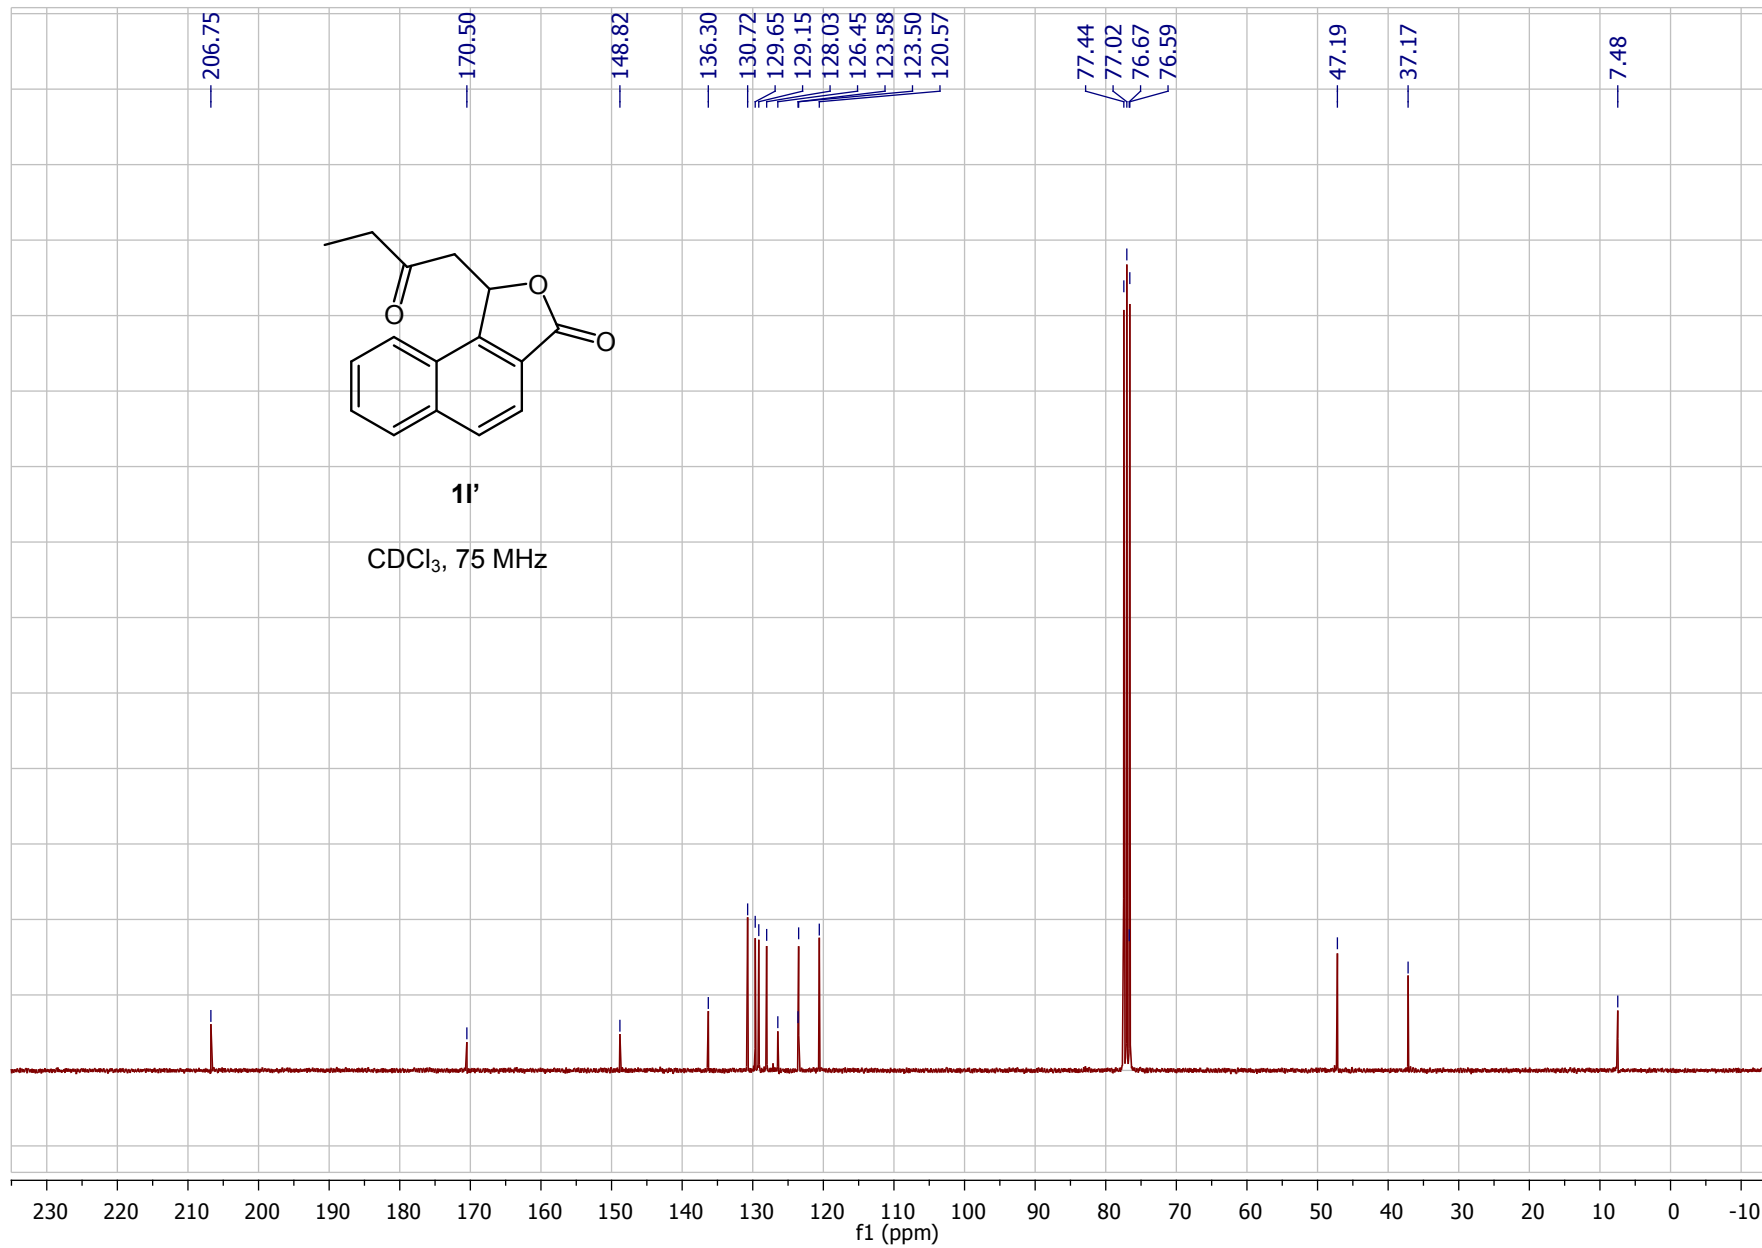

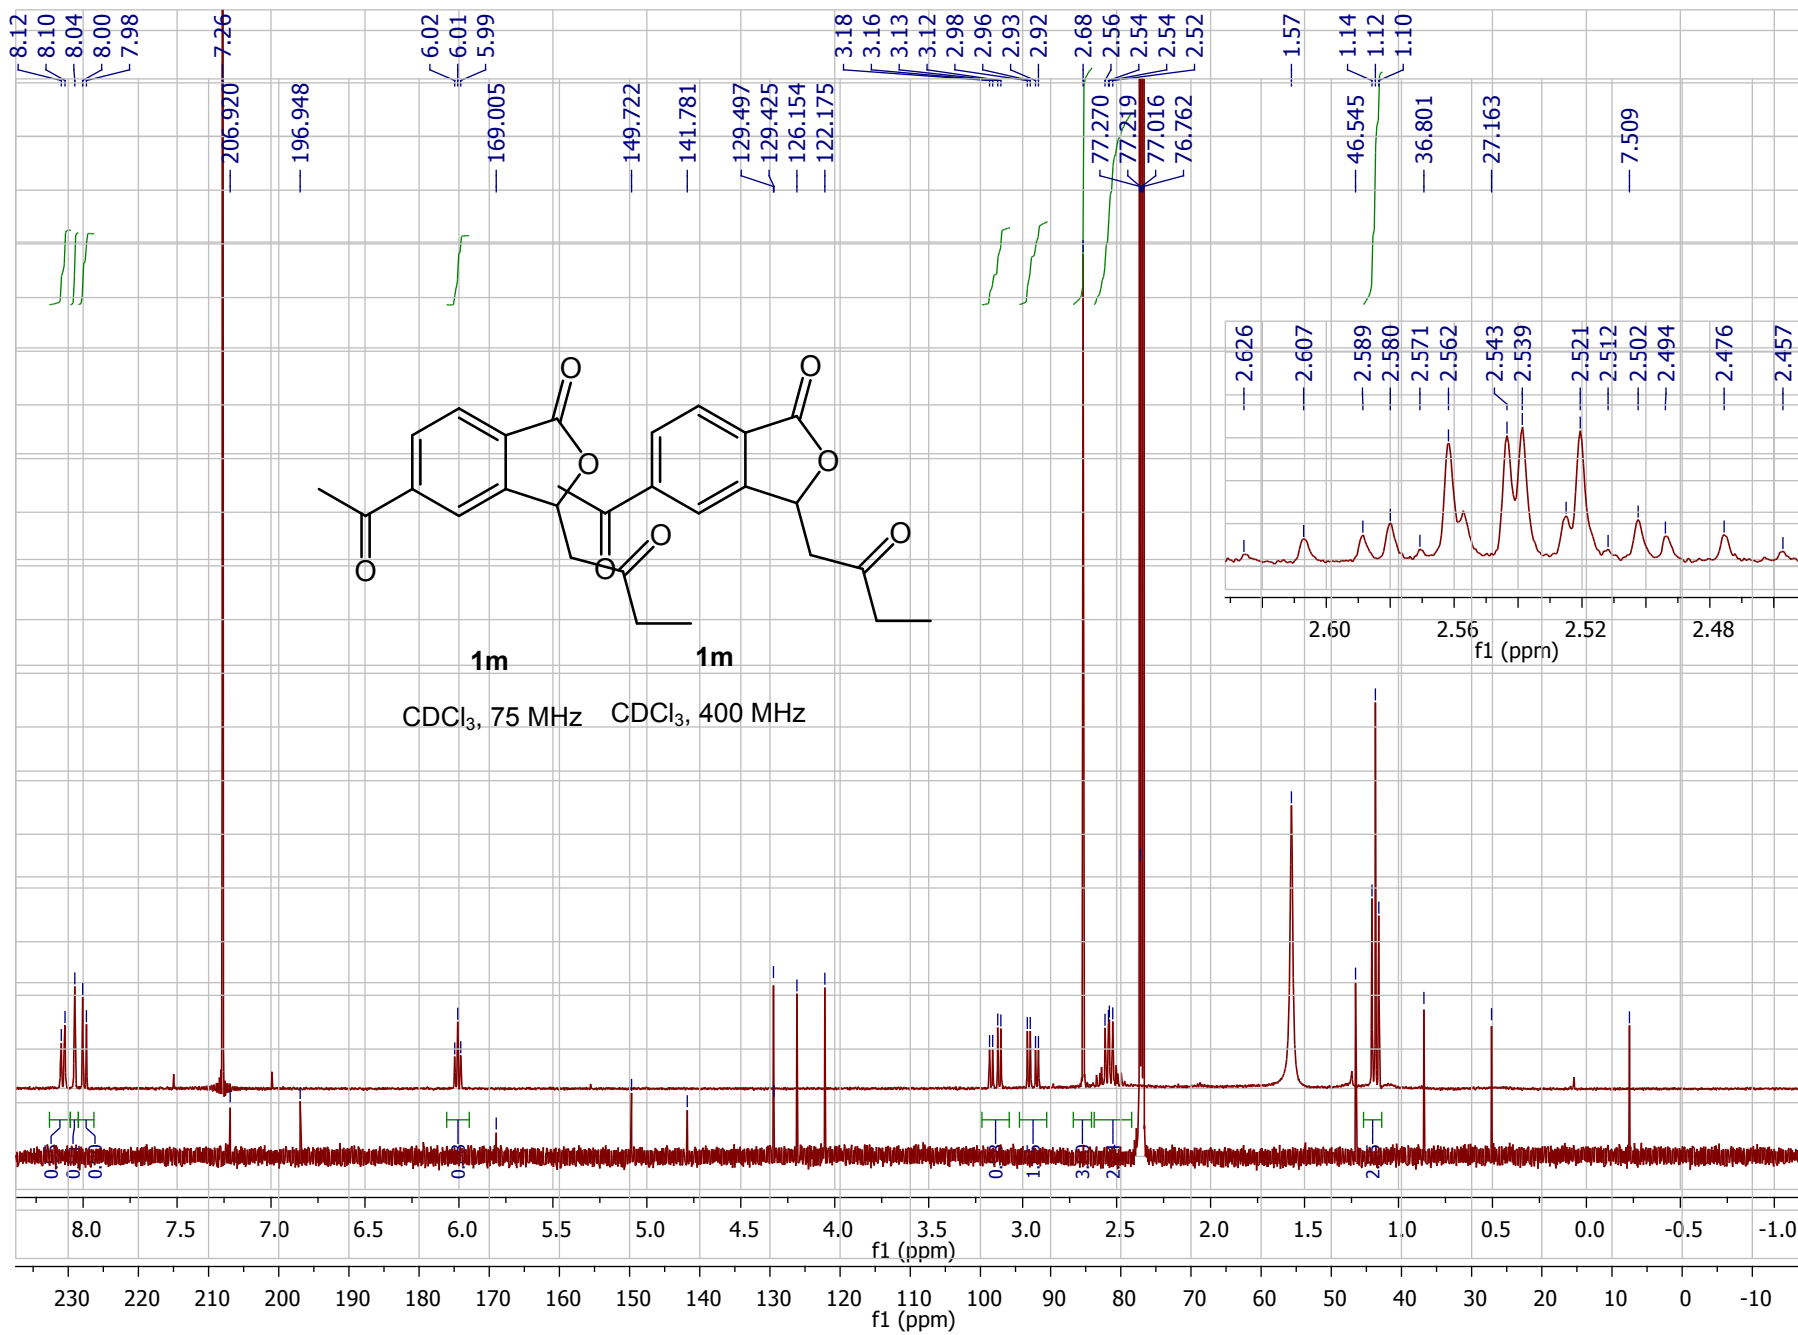

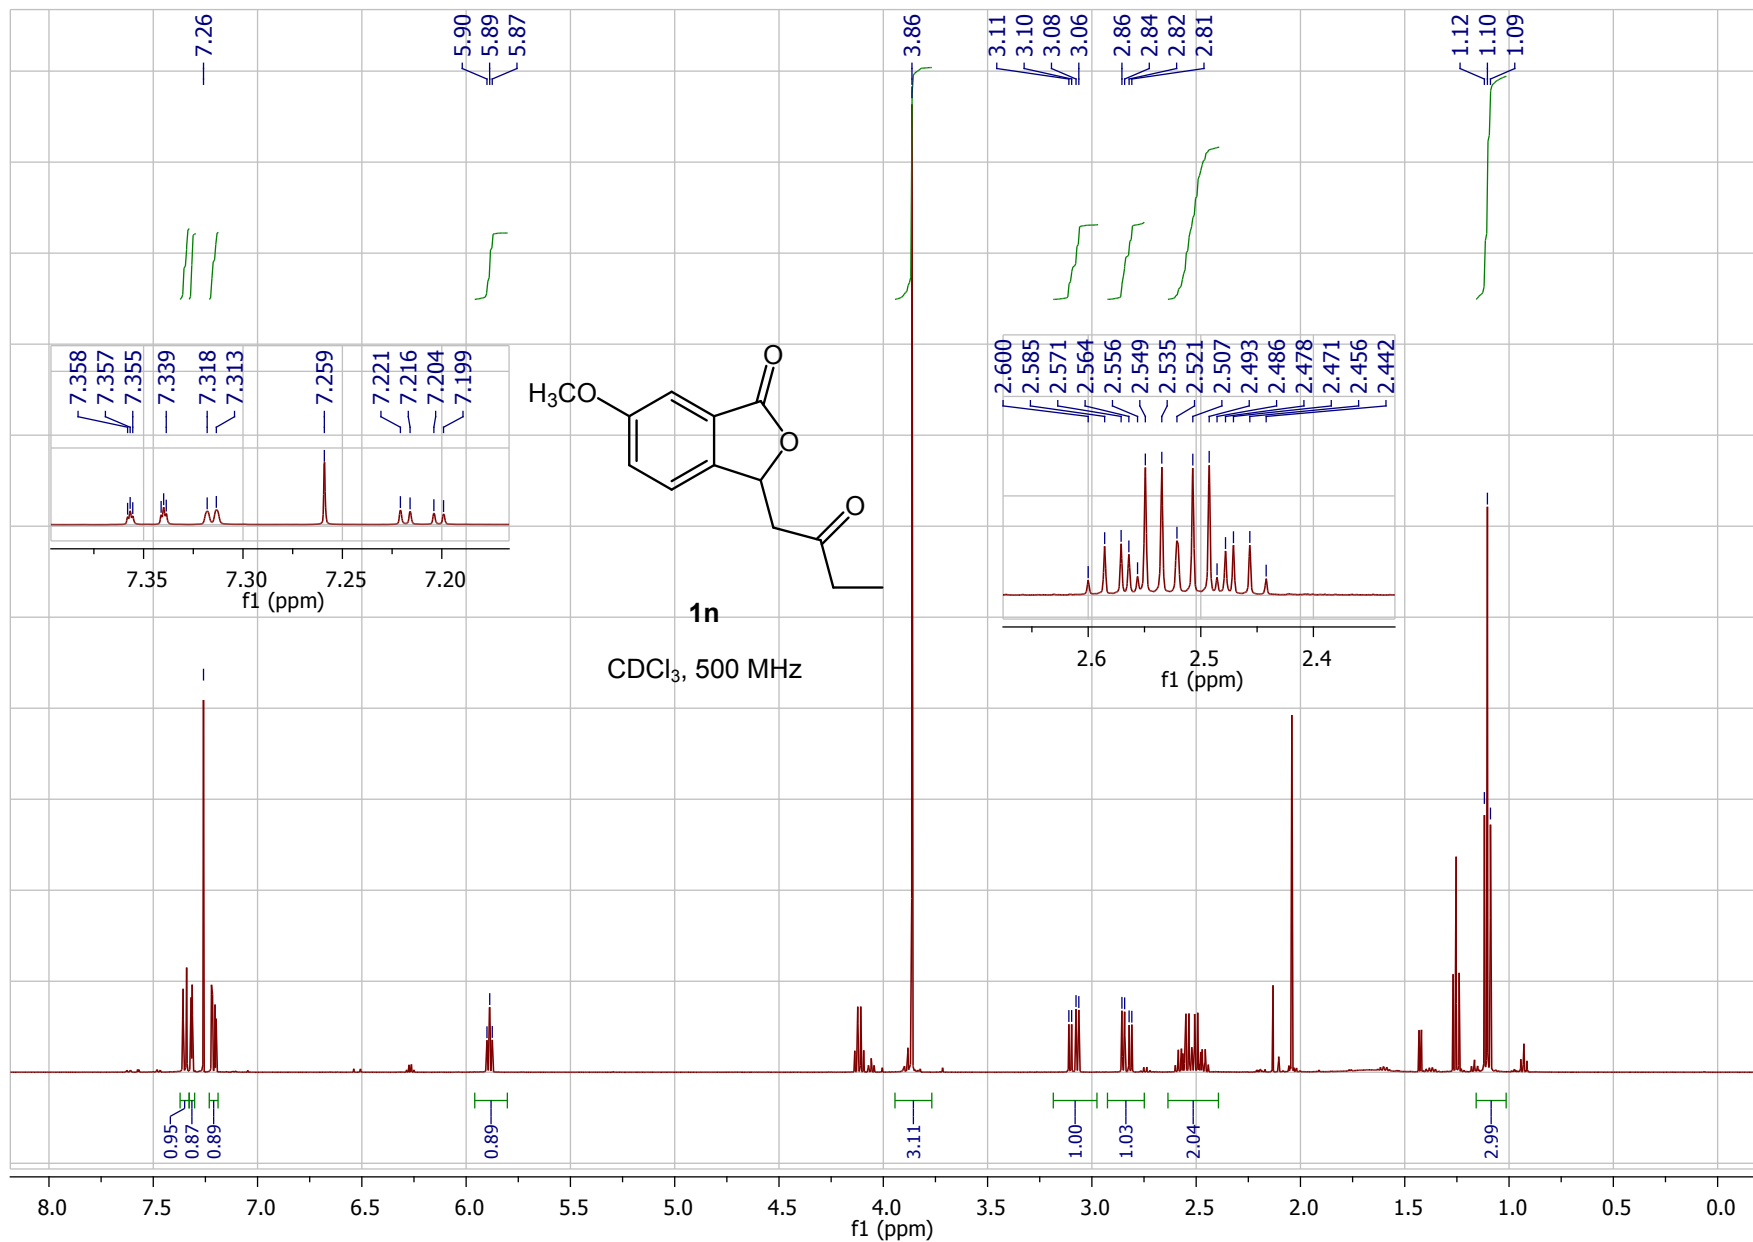



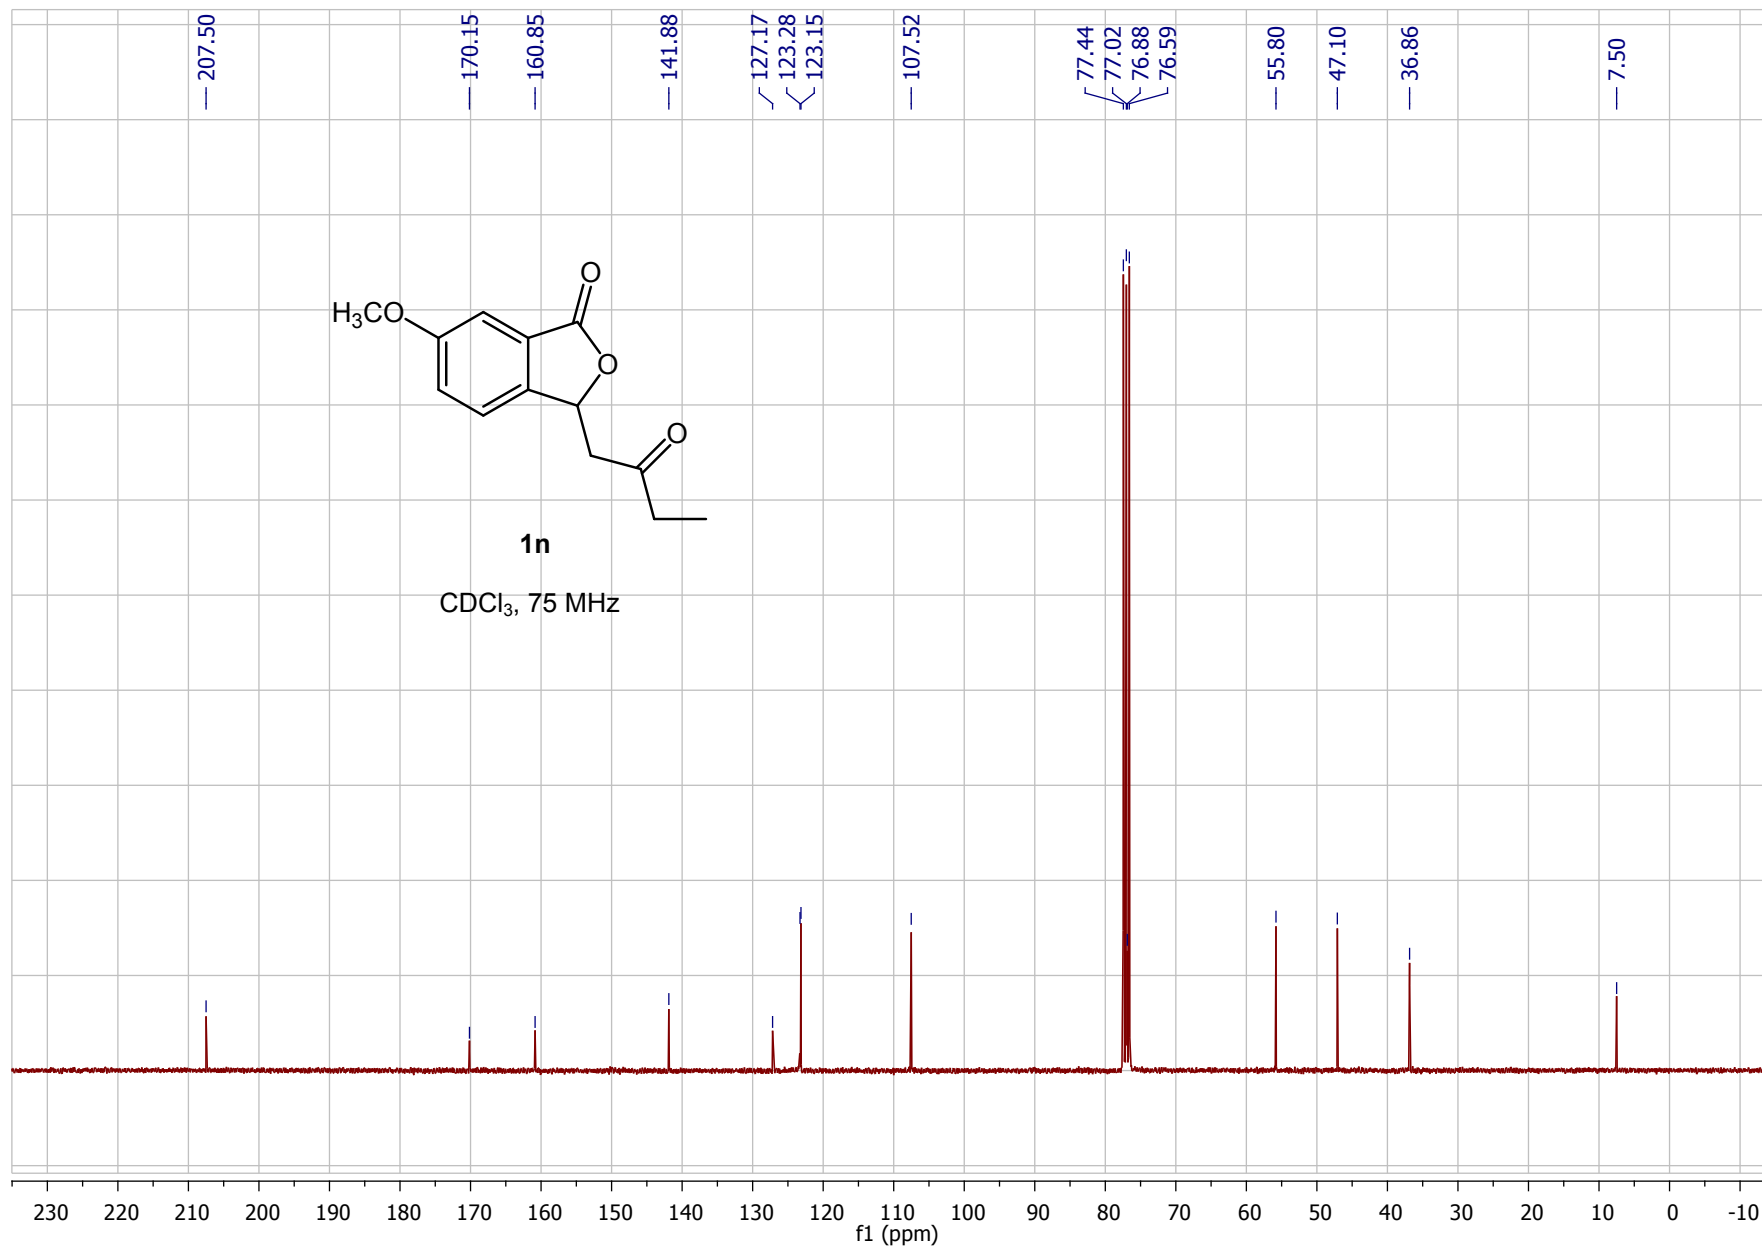

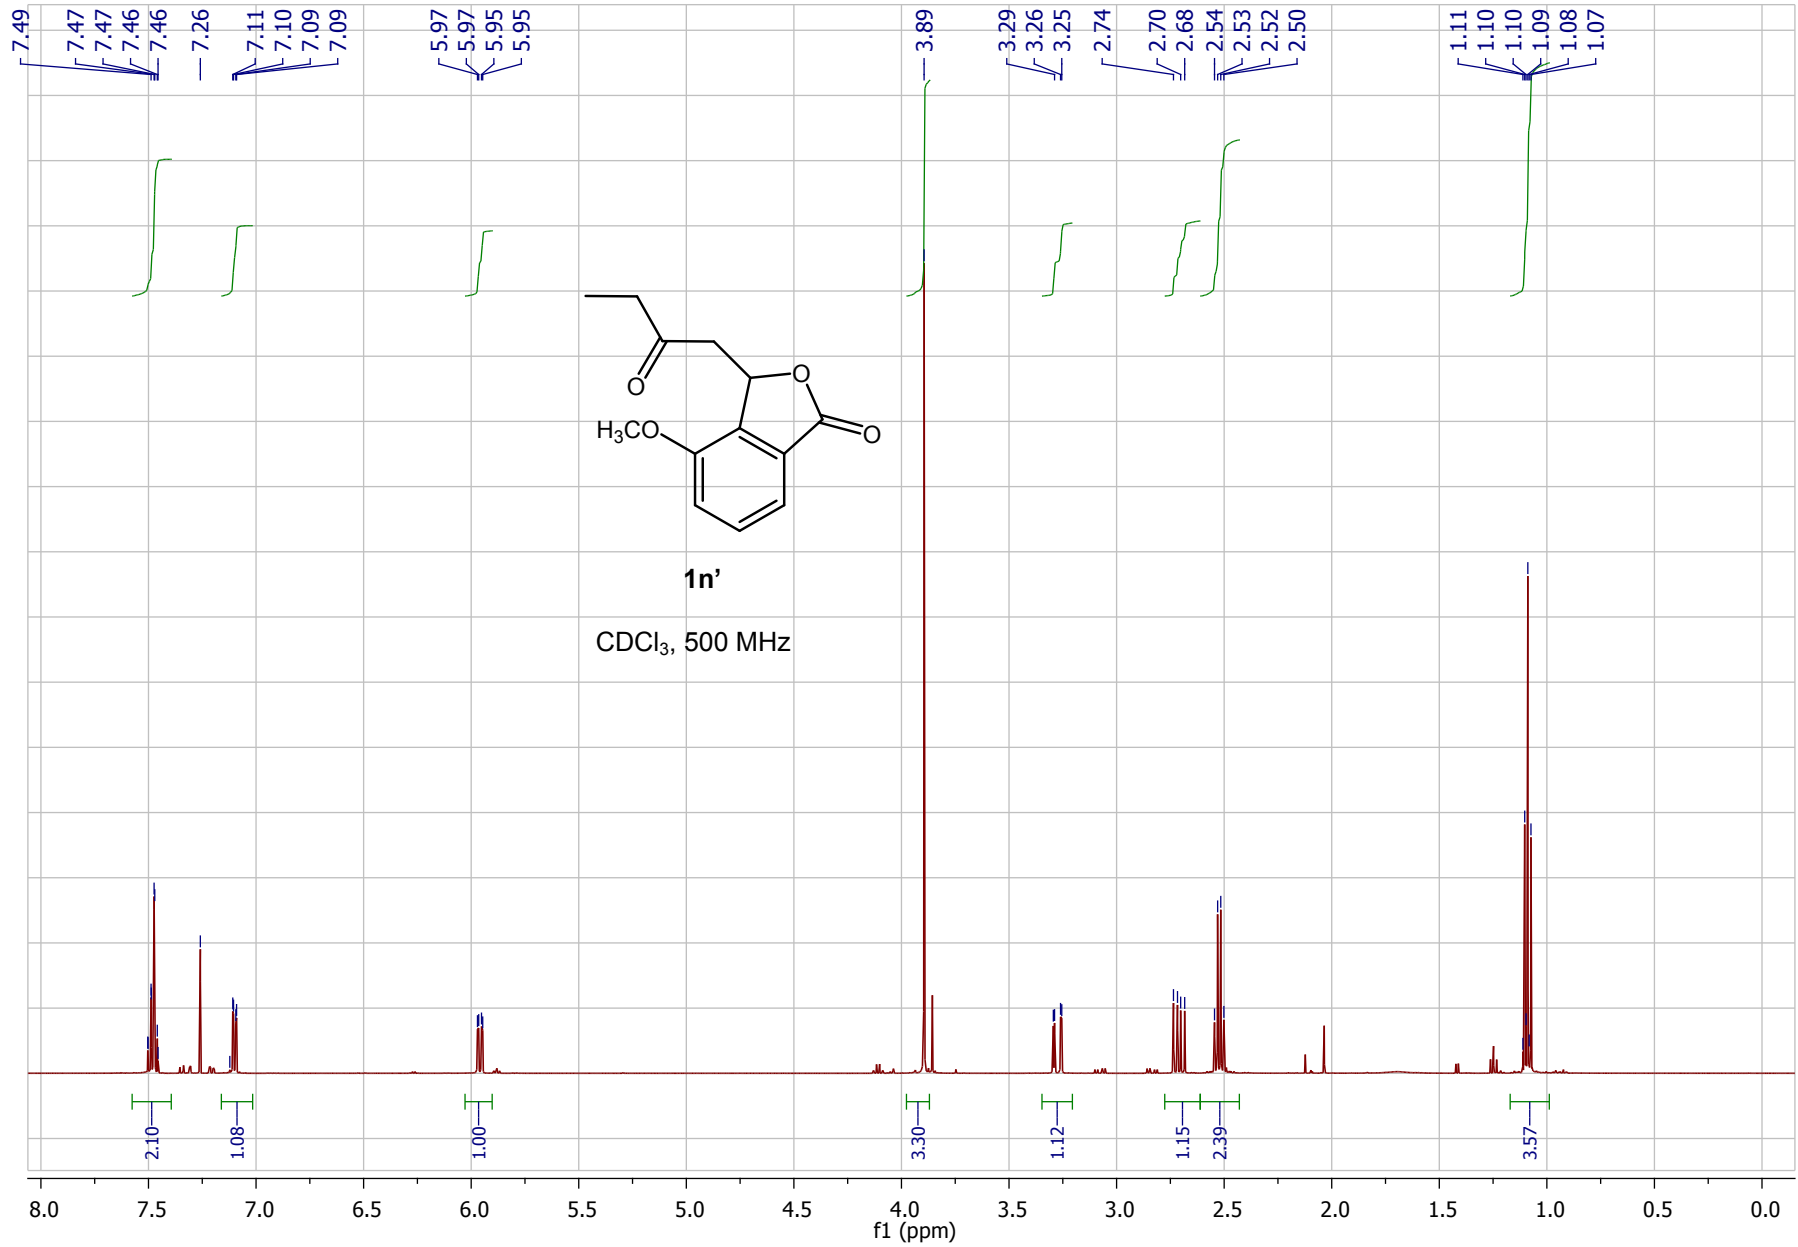

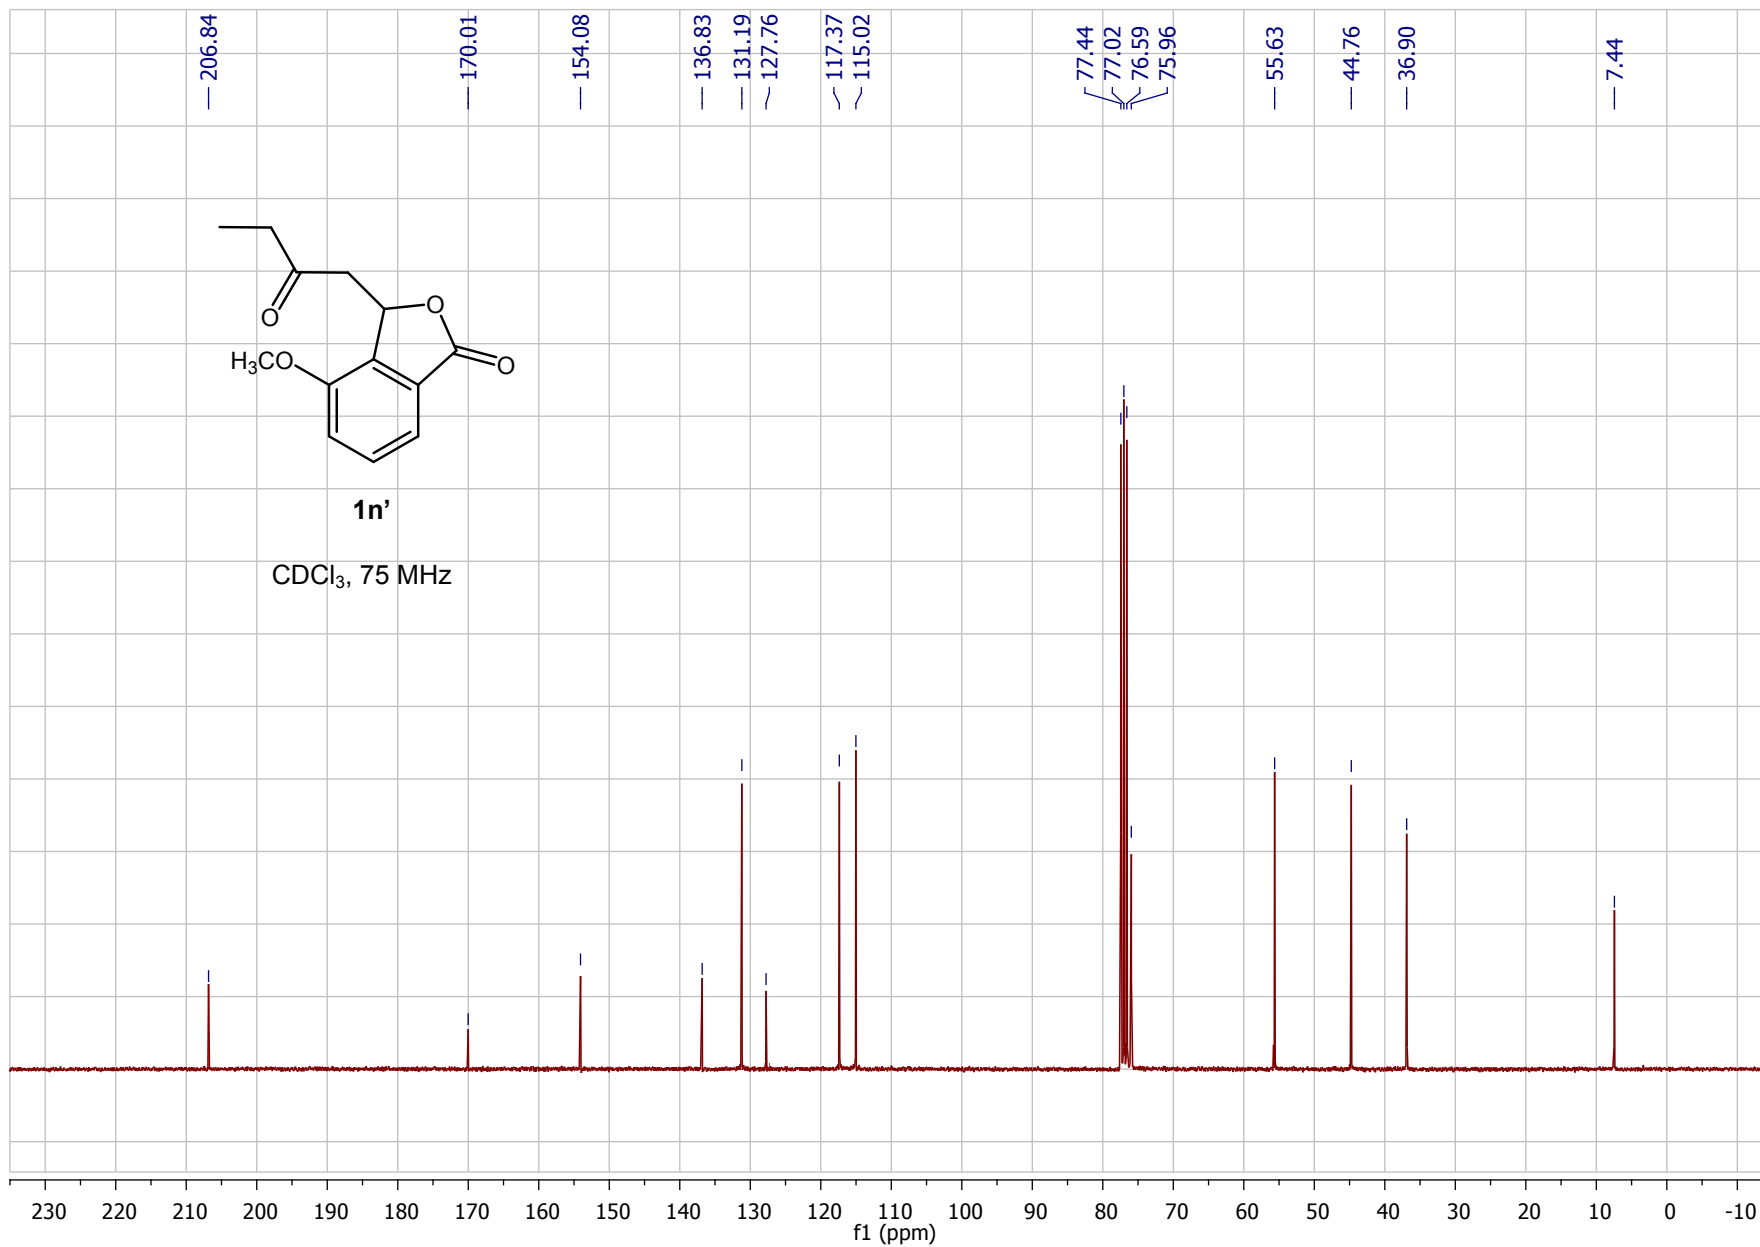

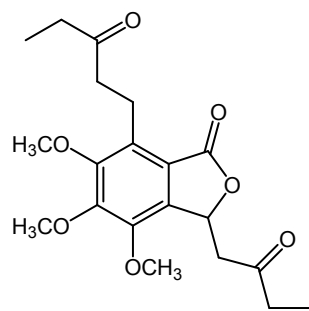

**2**

CDCl<sub>3</sub>, 300 MHz

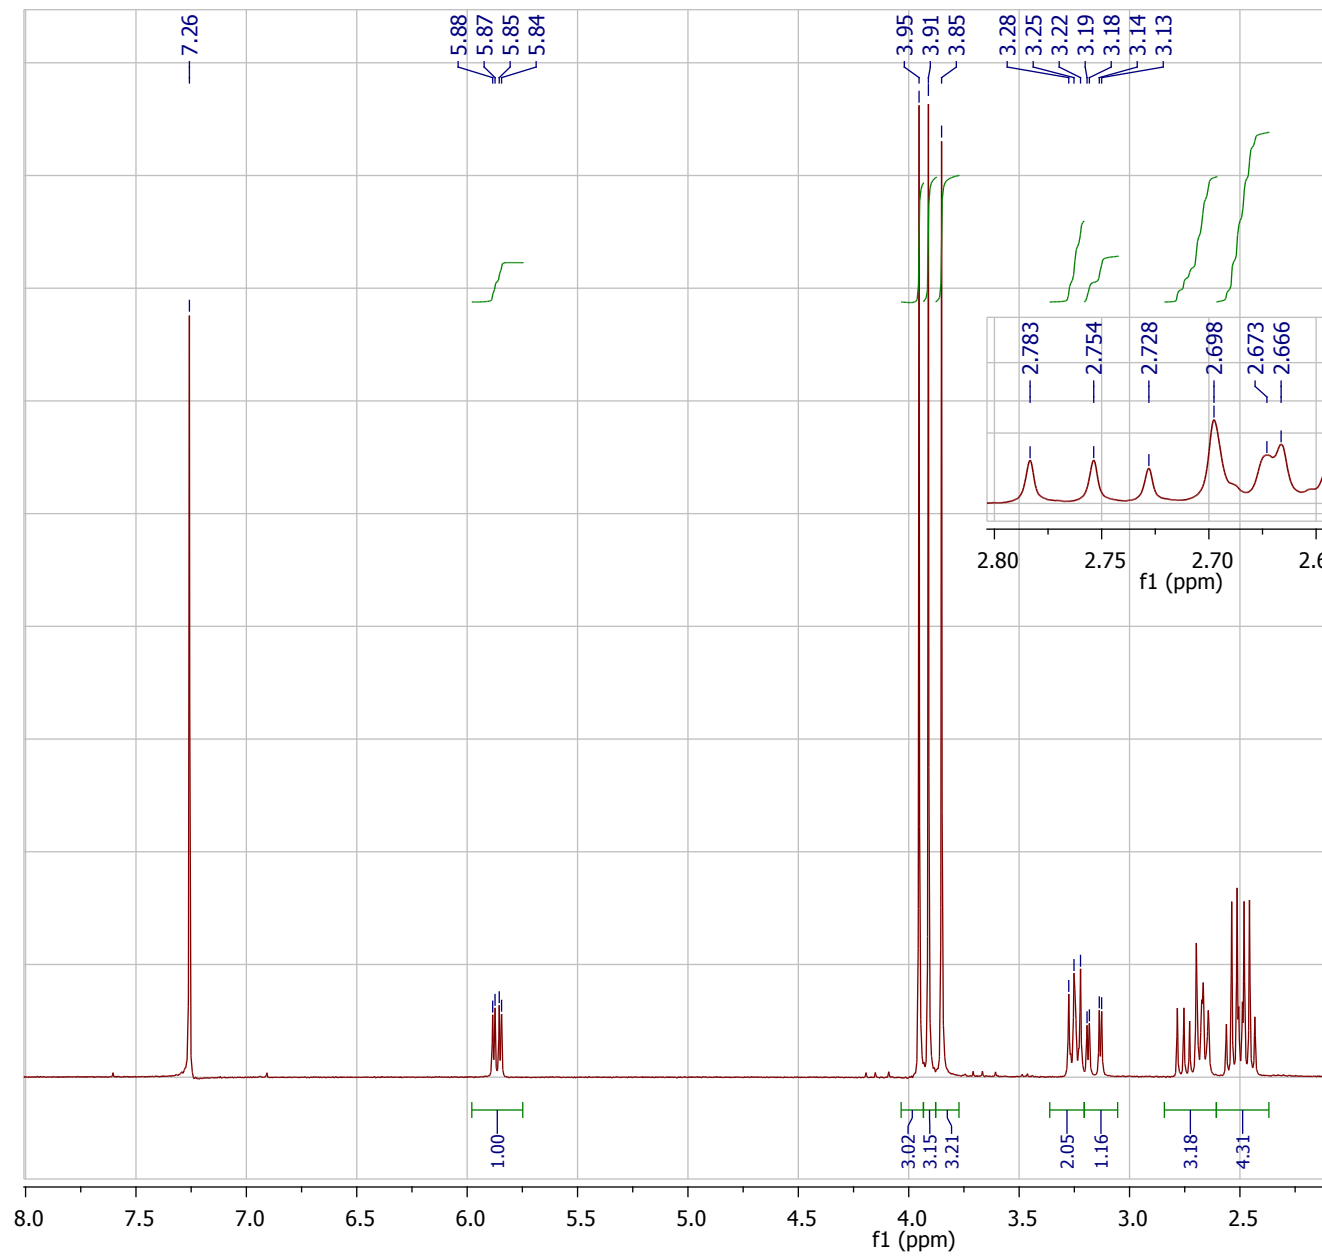

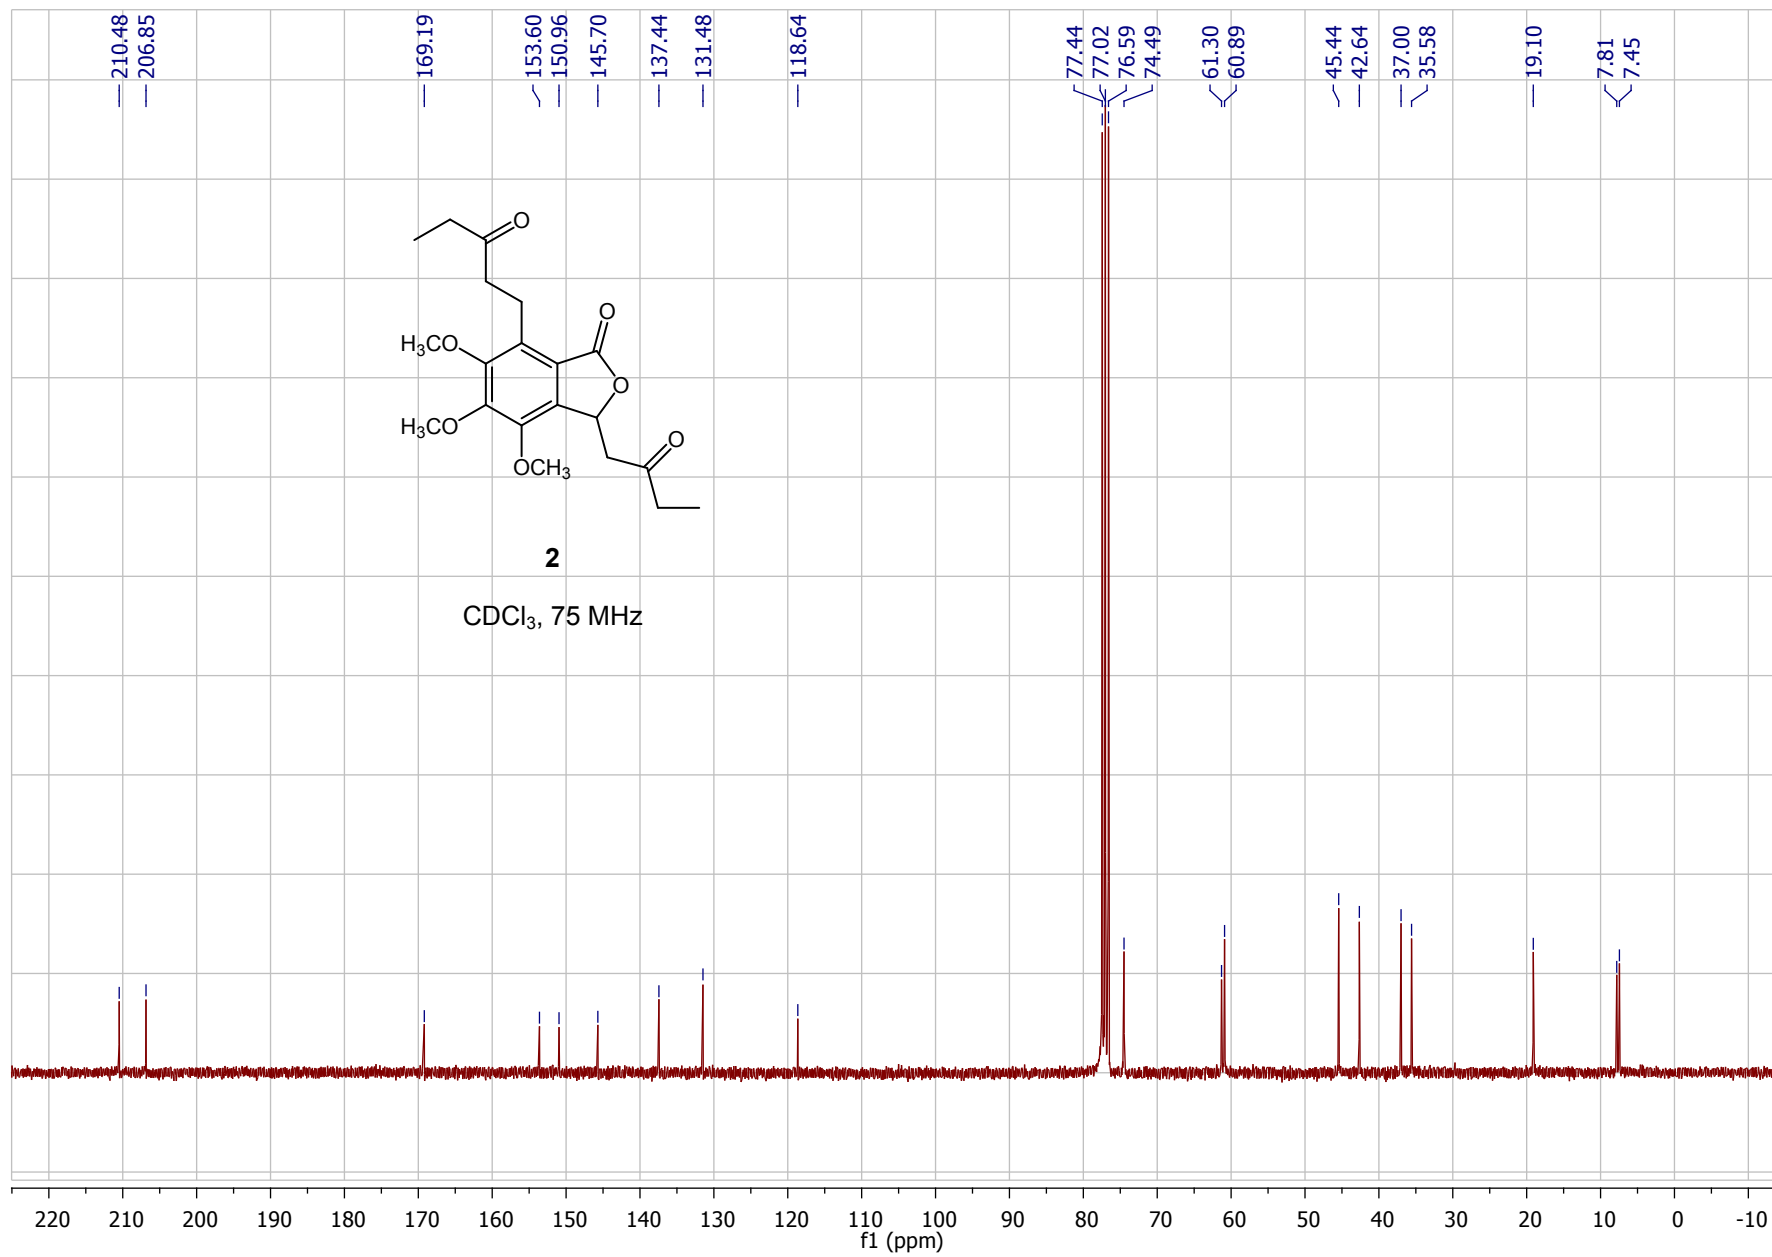

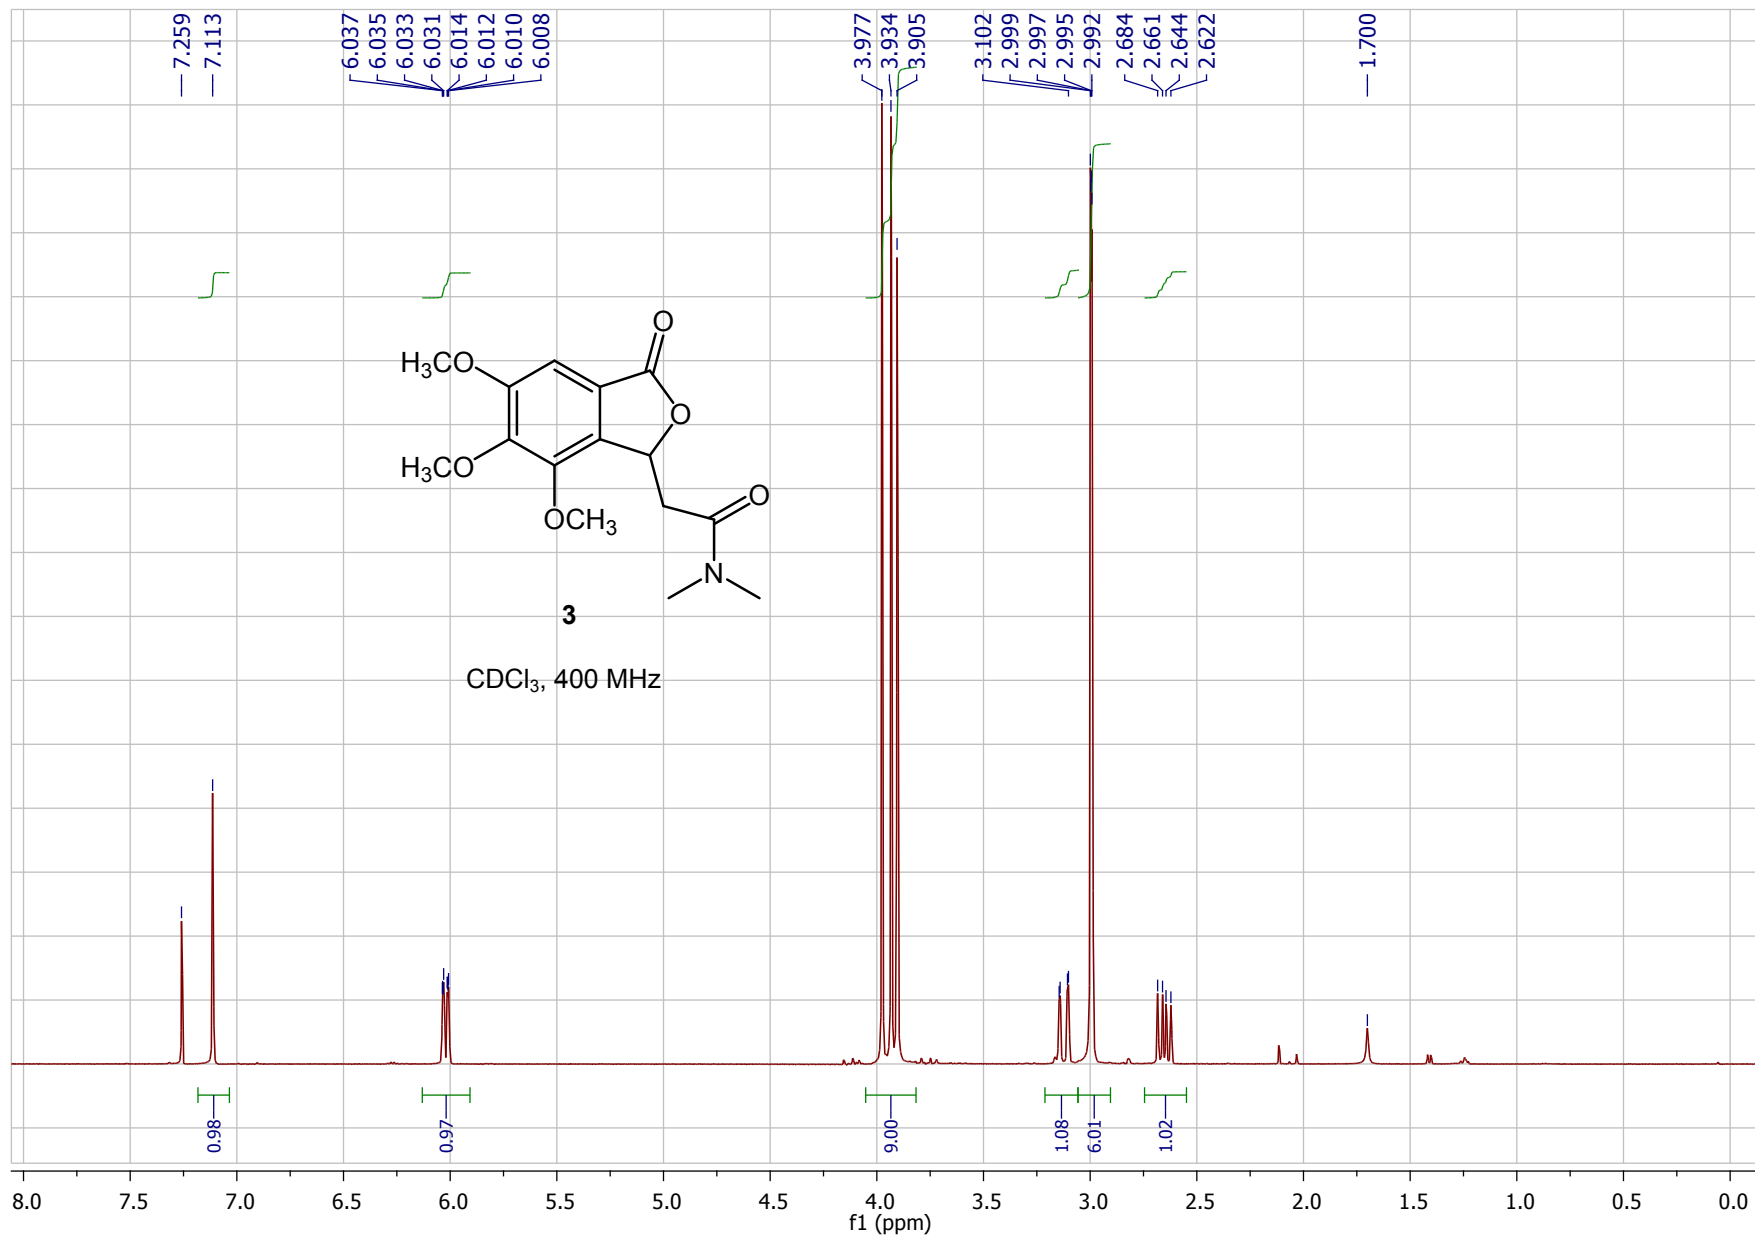

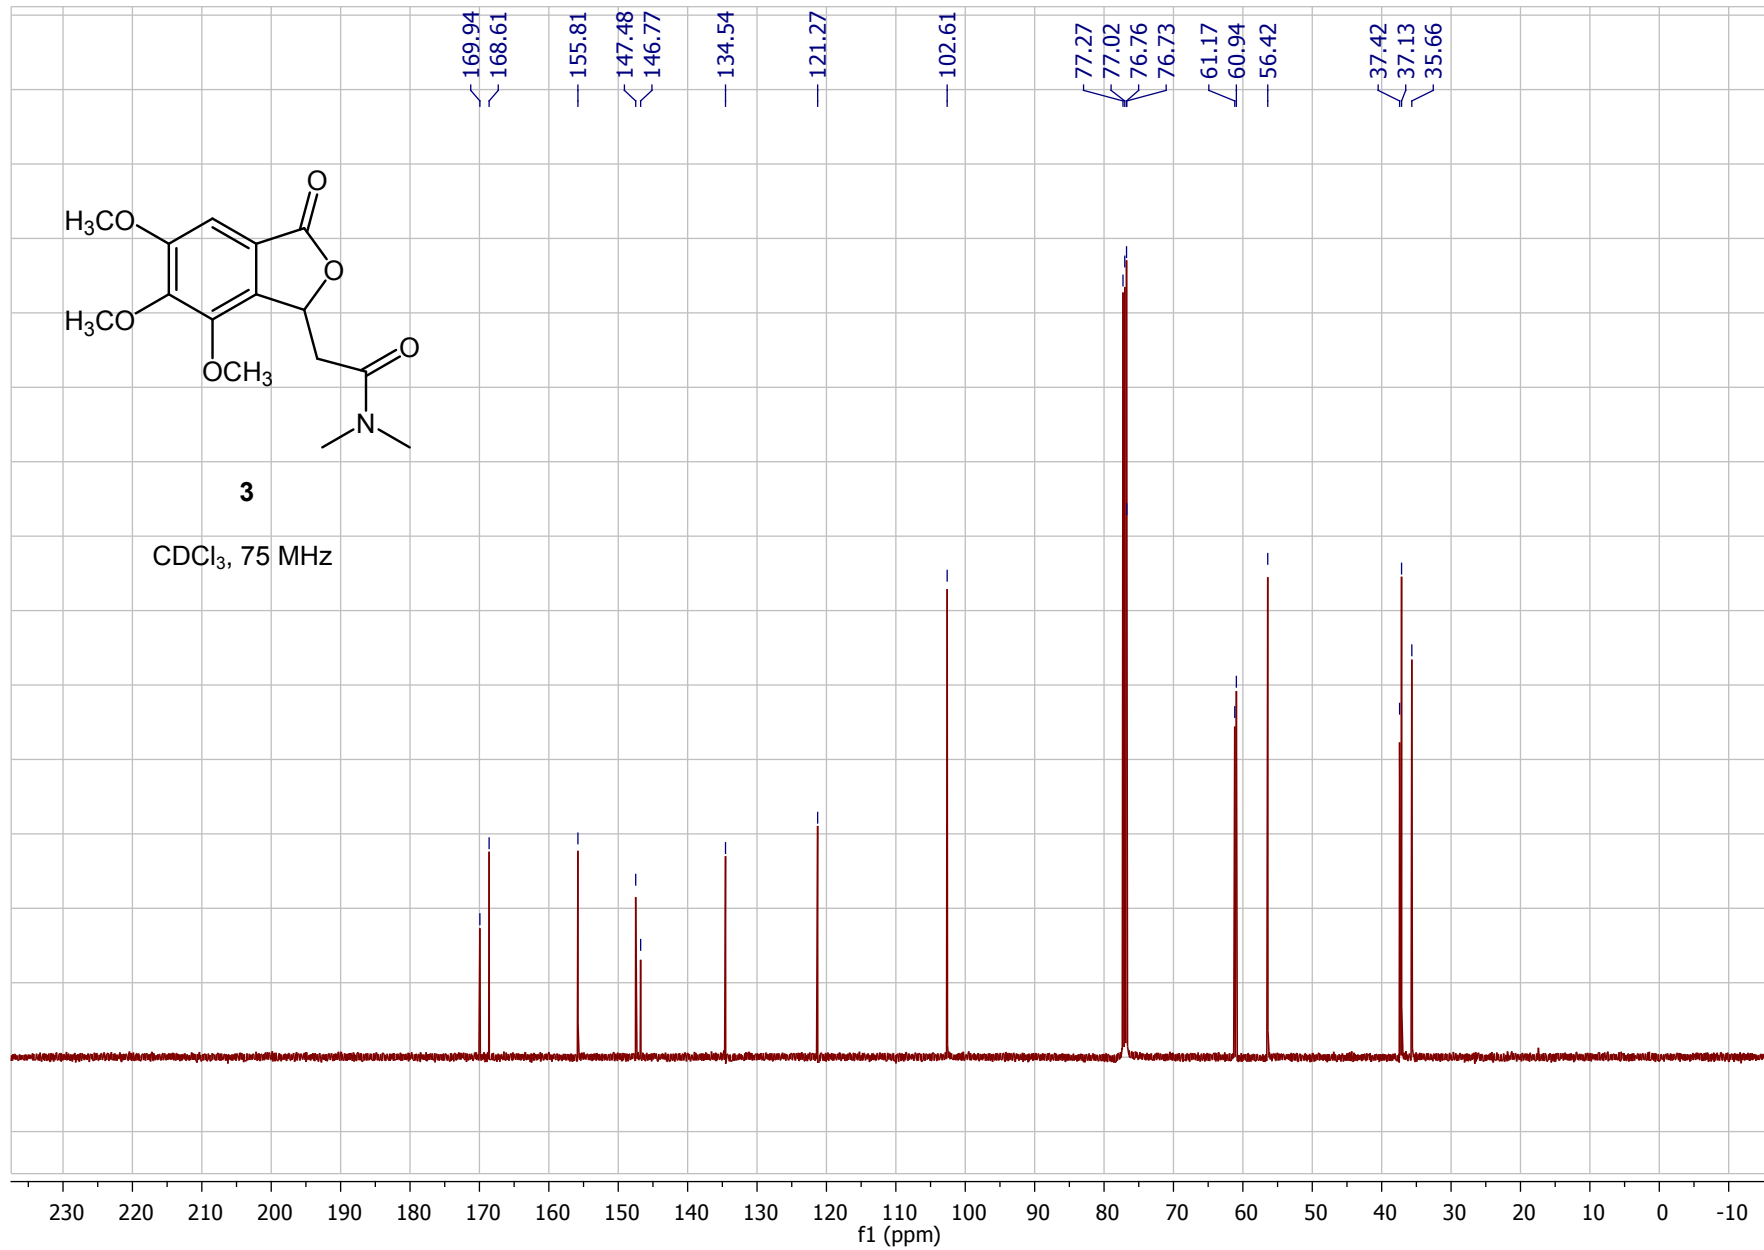

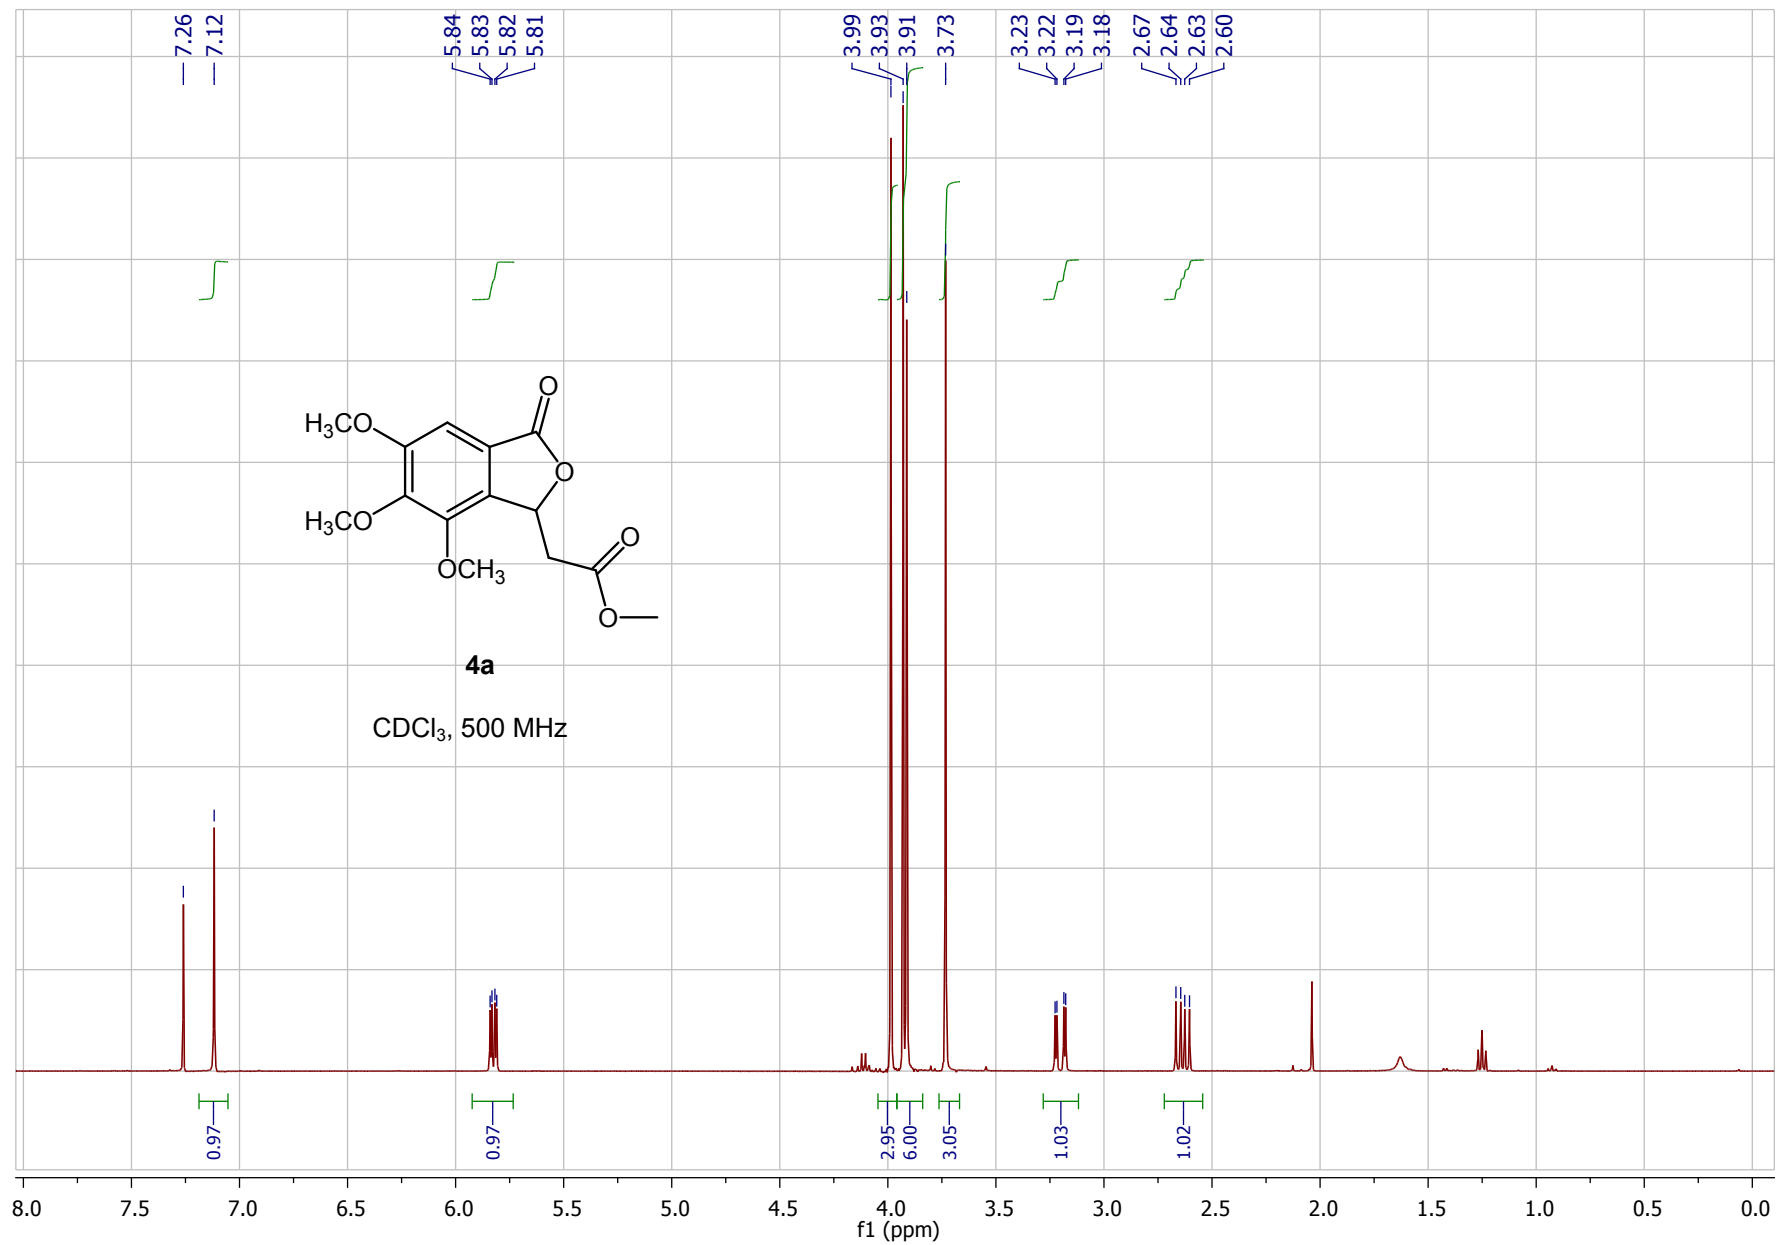



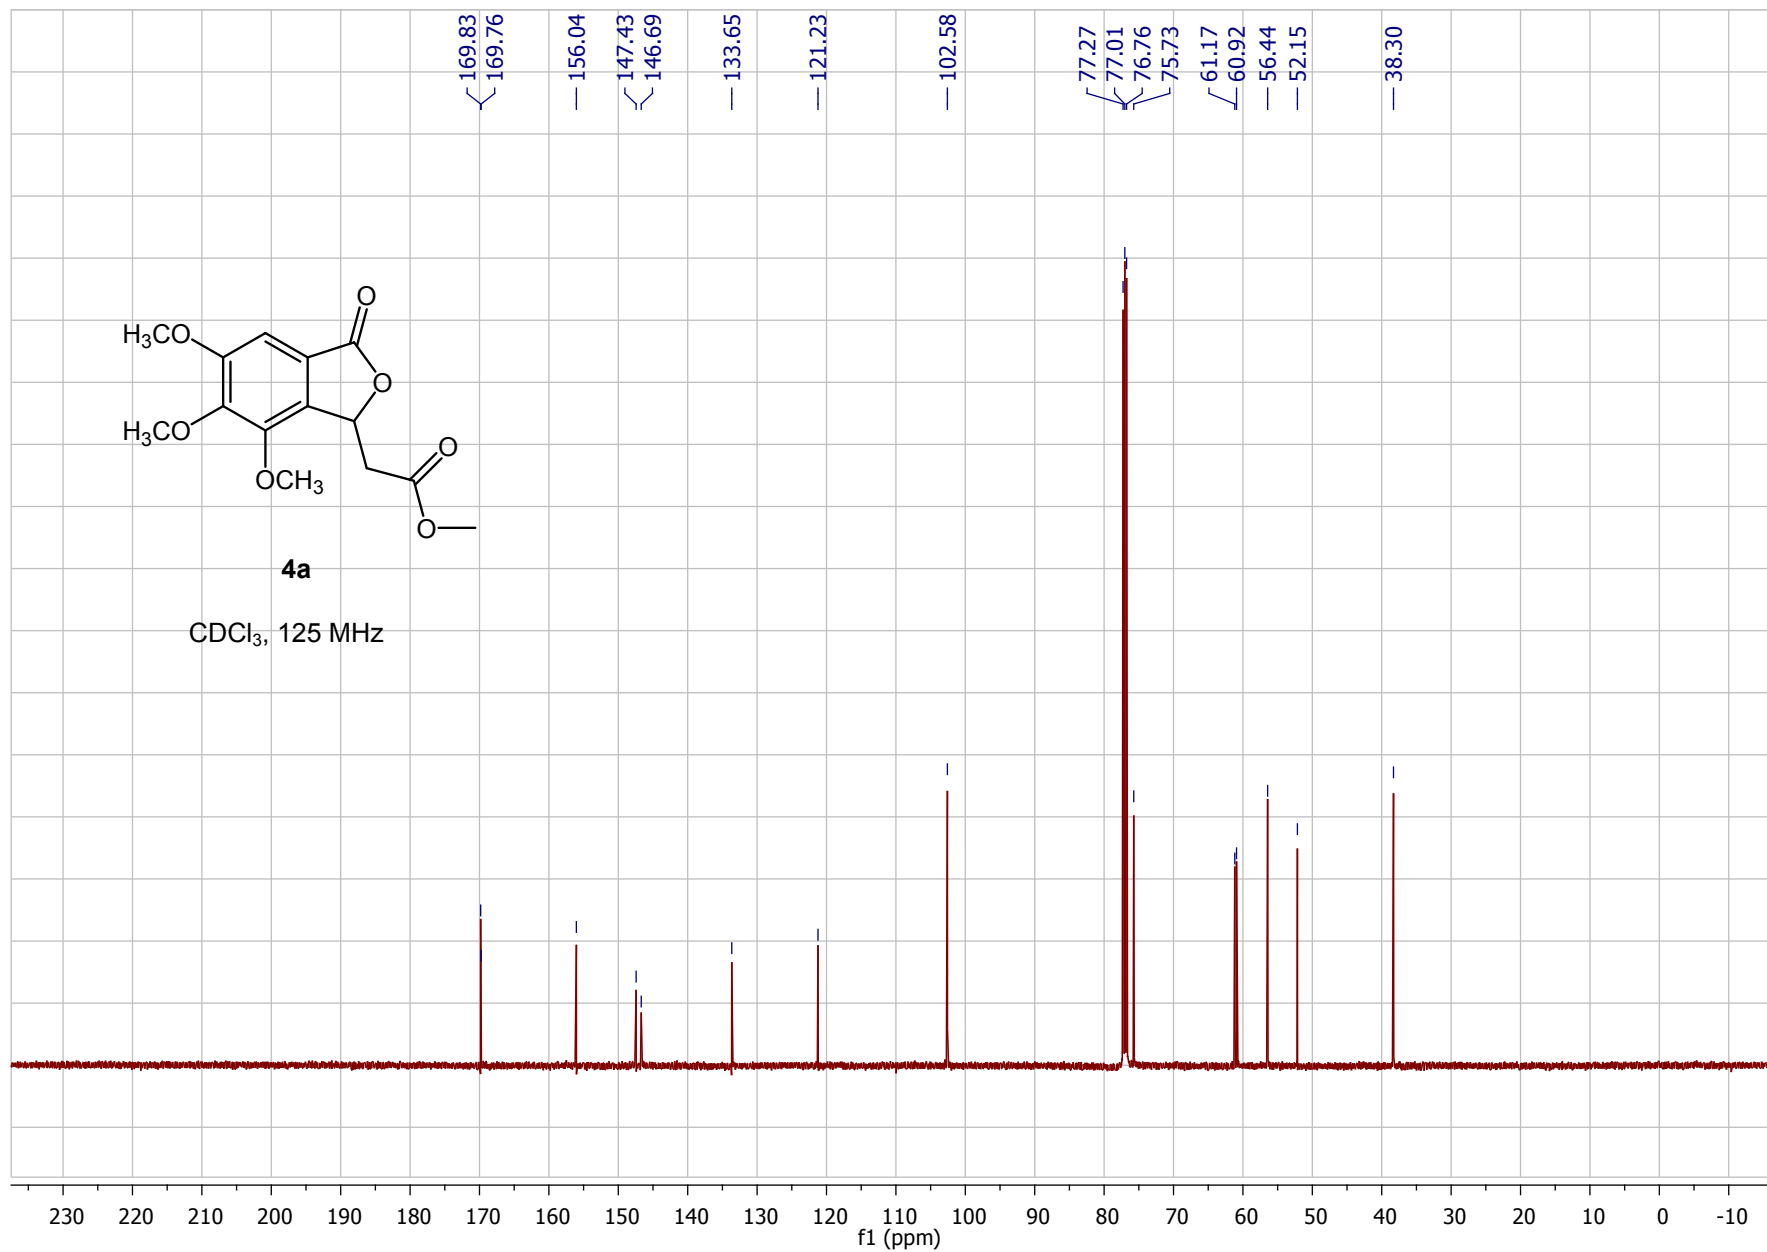

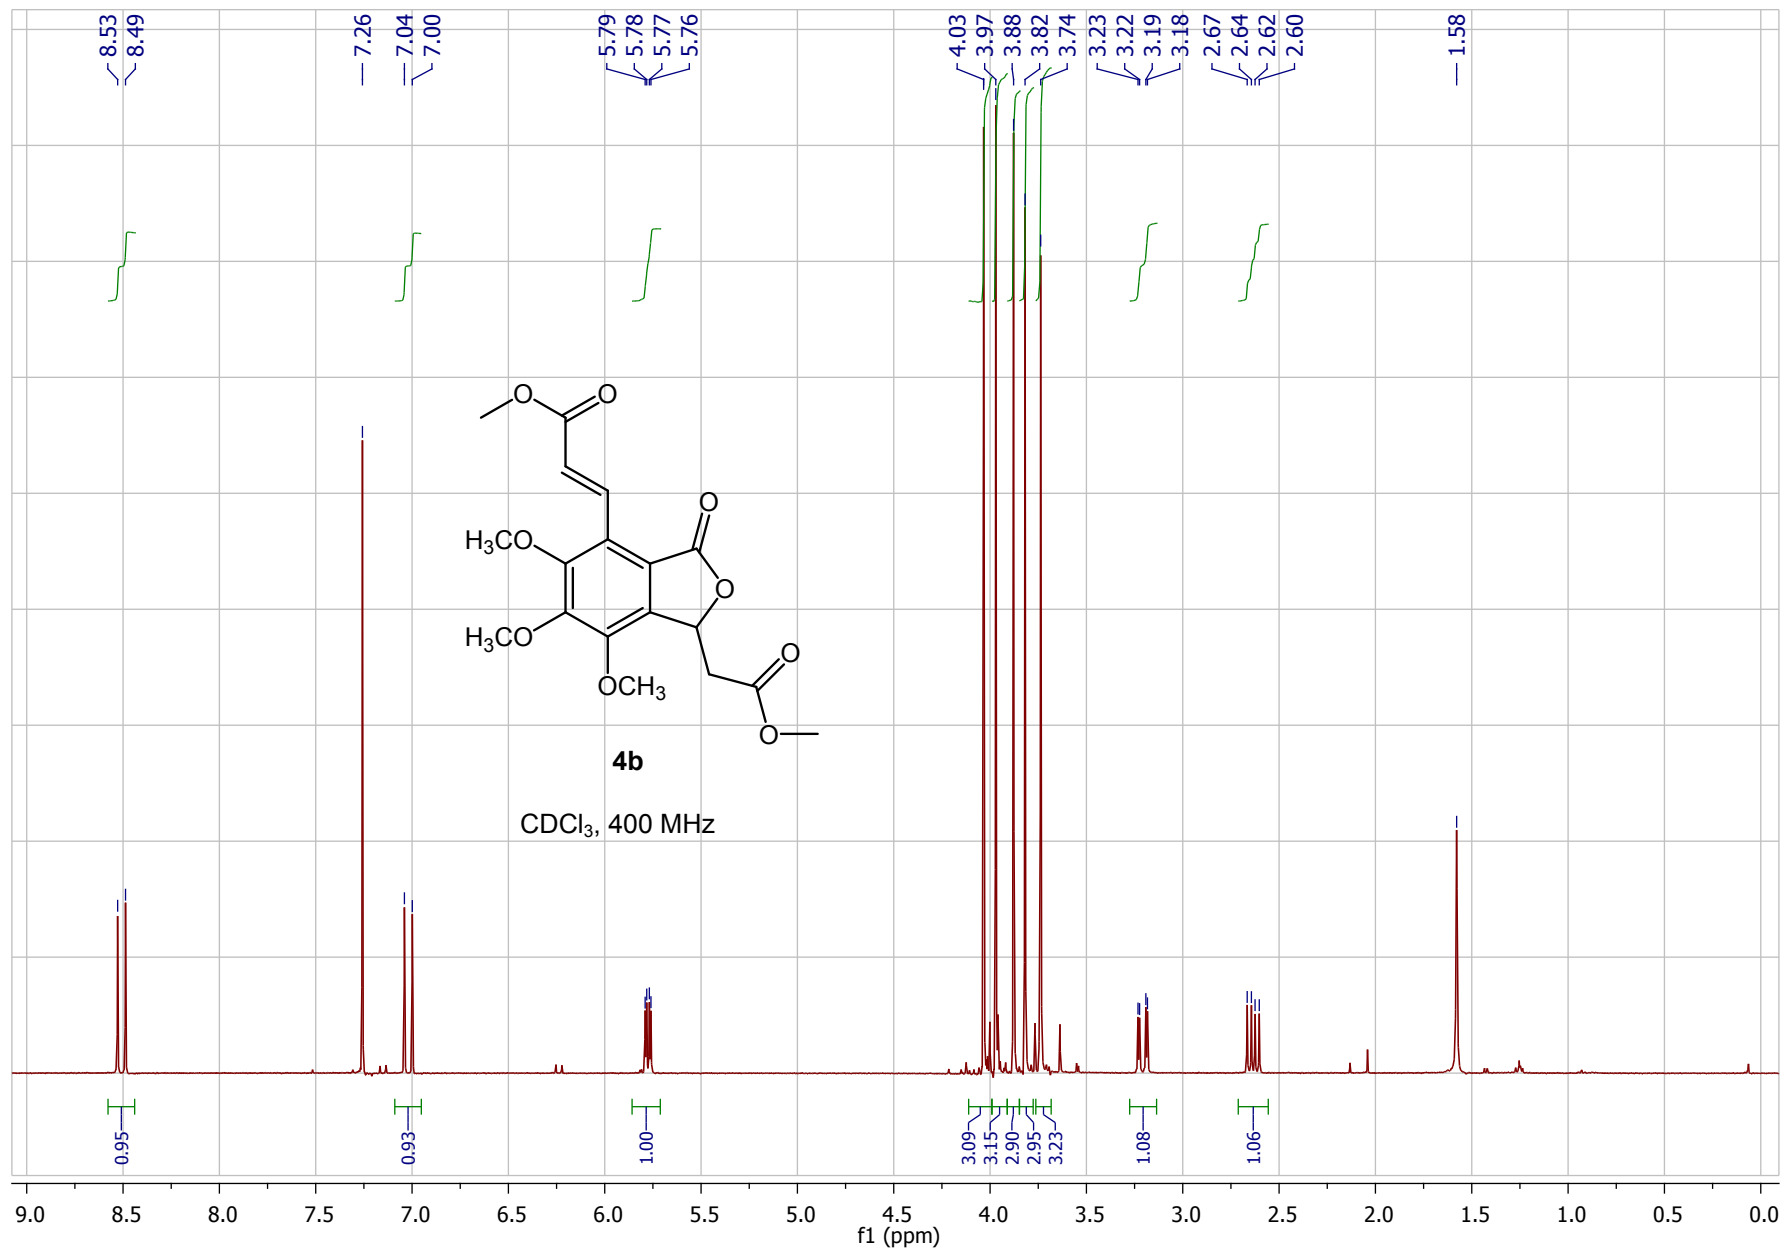

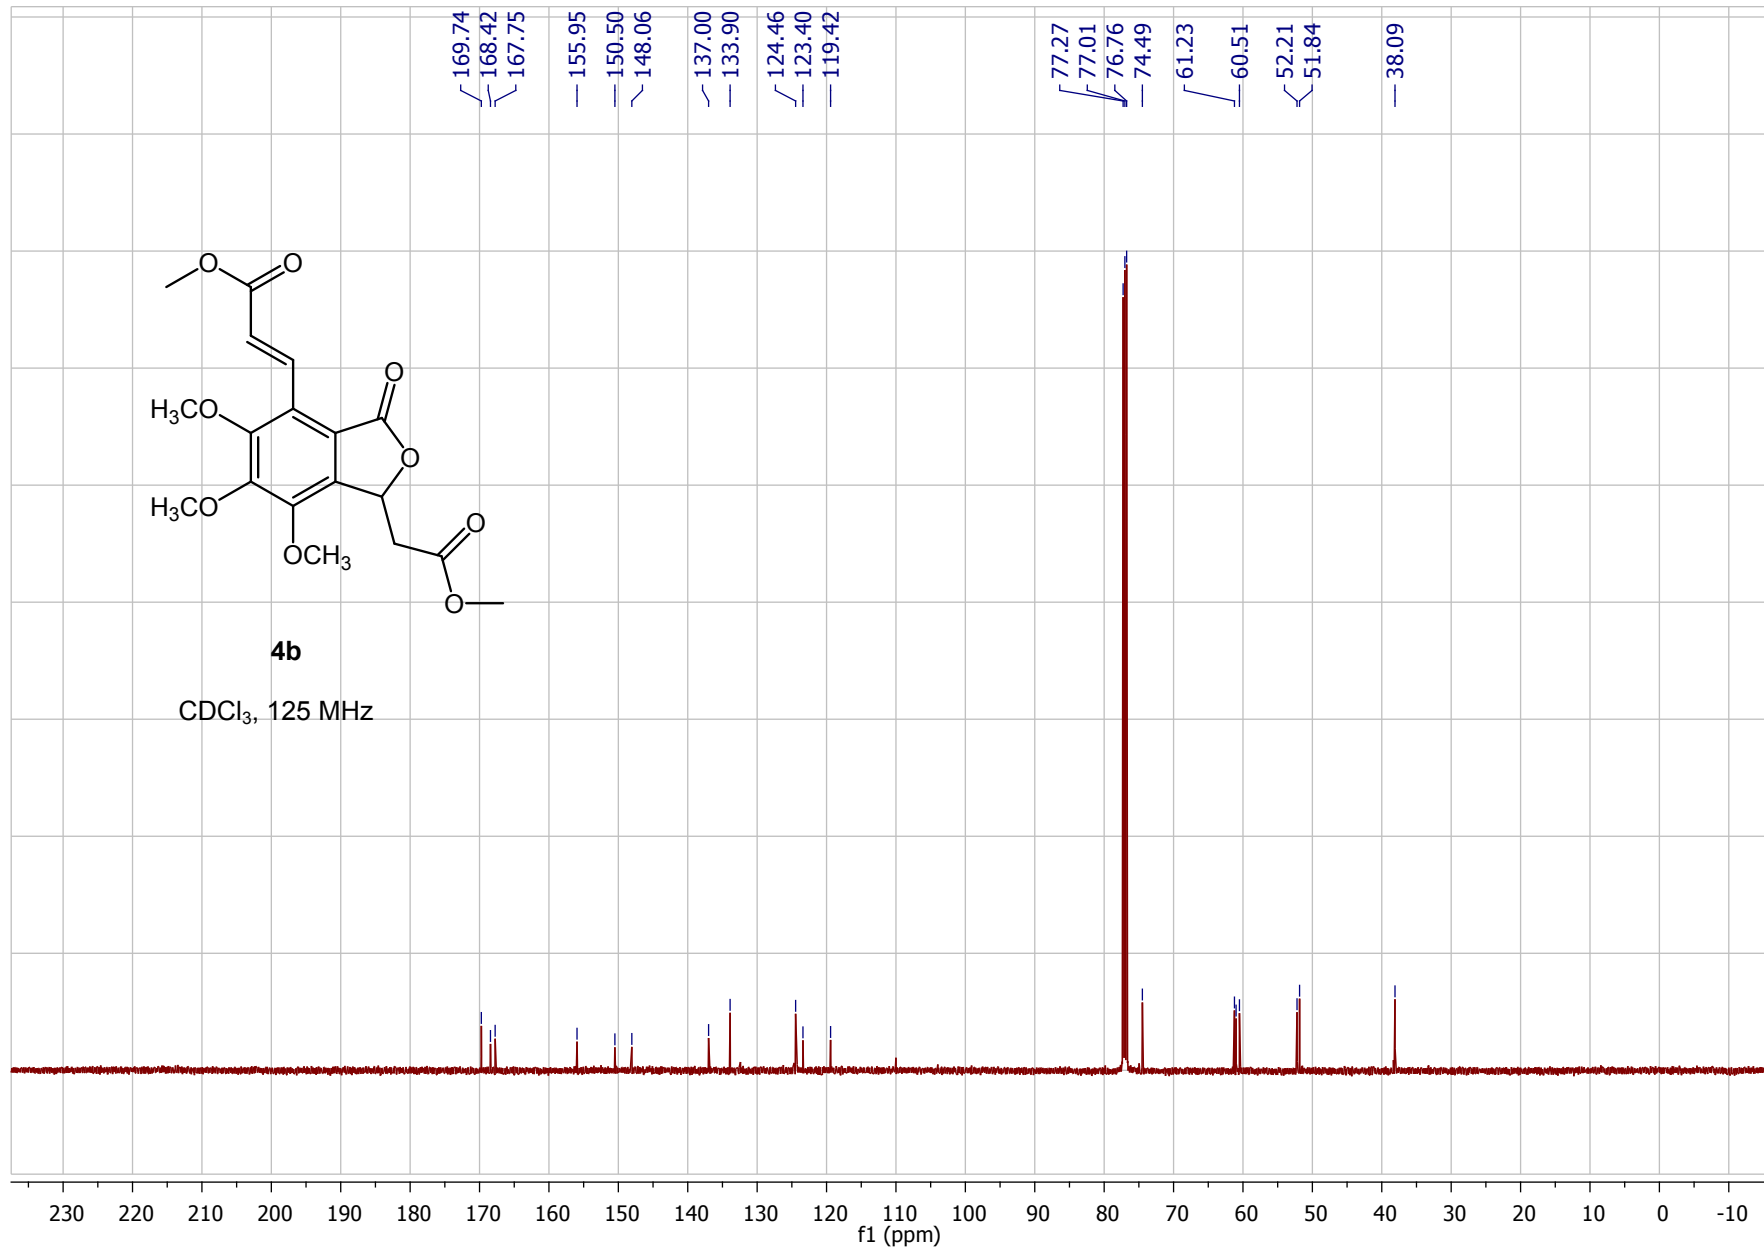

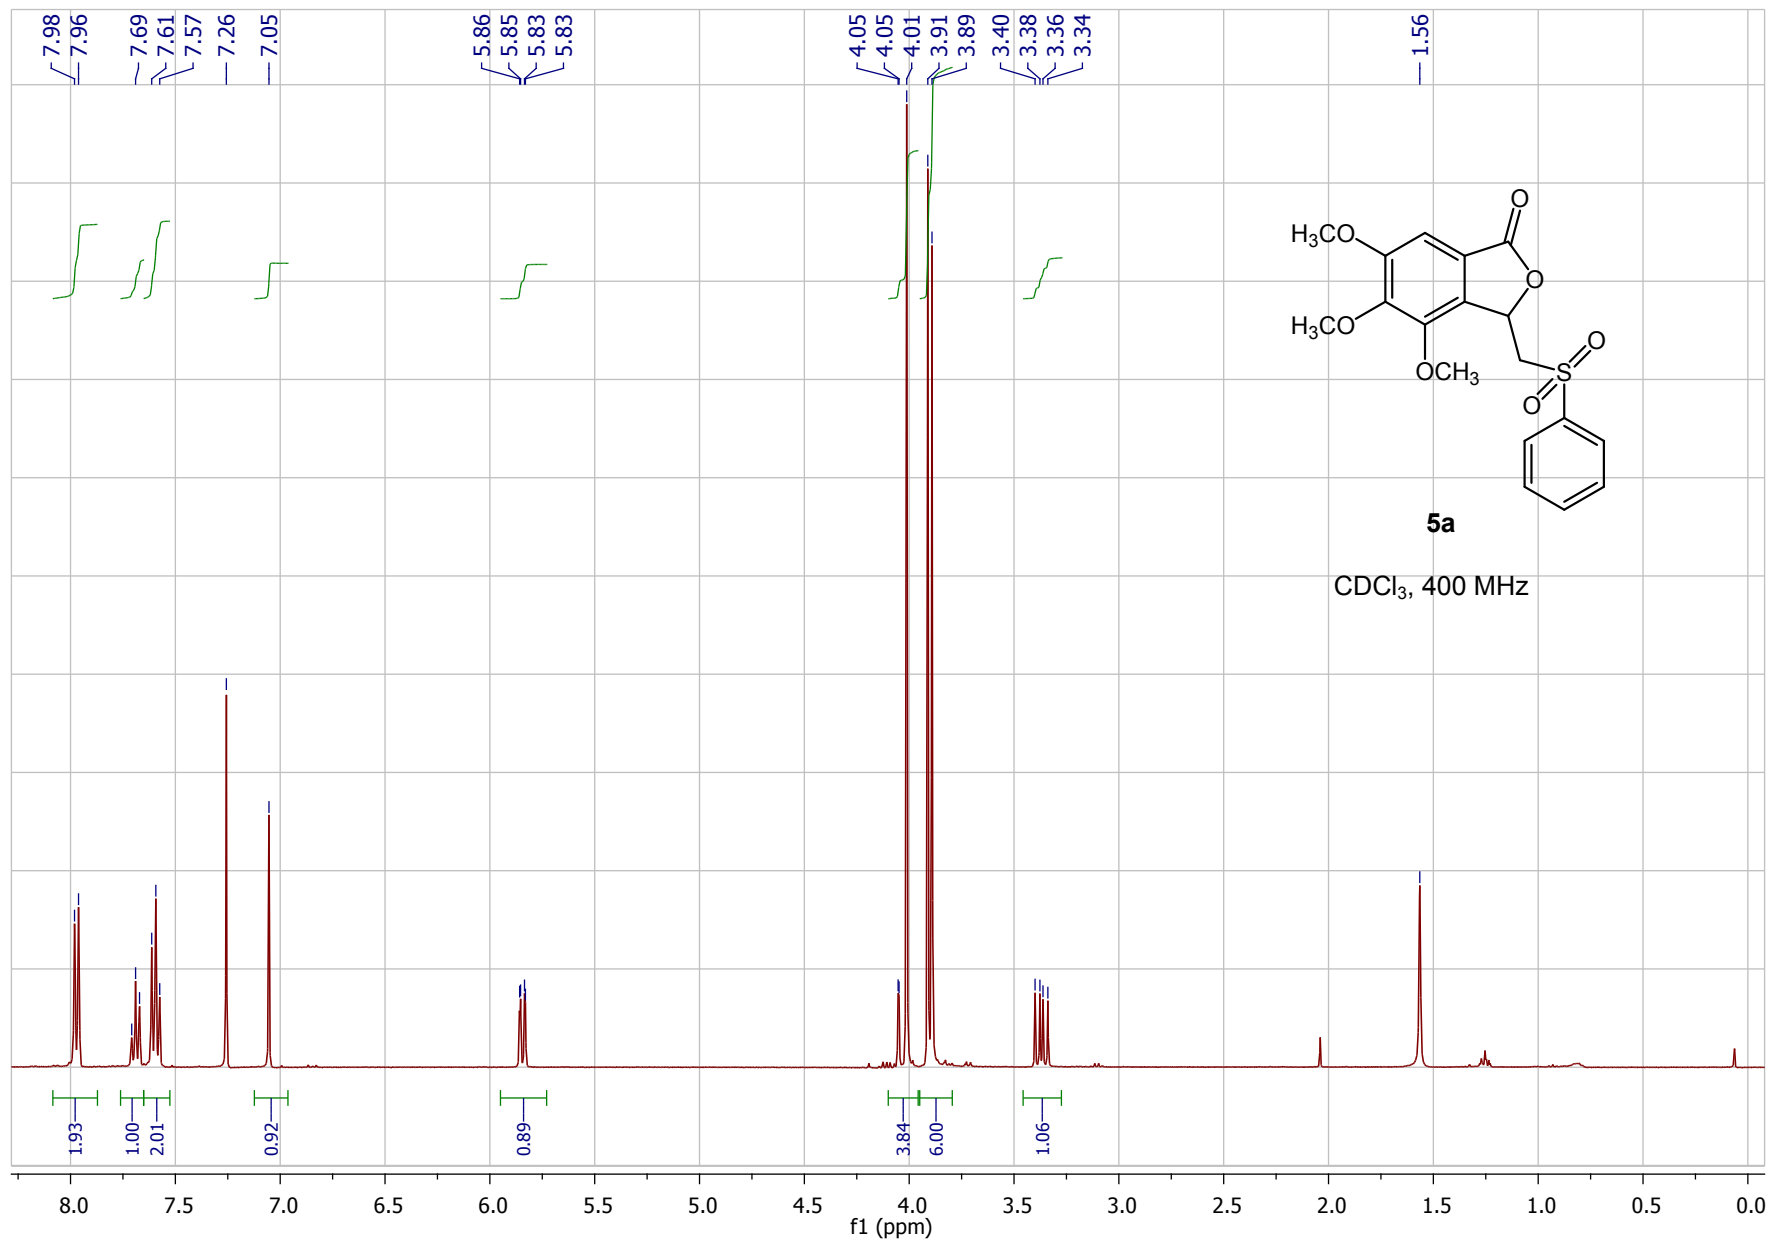

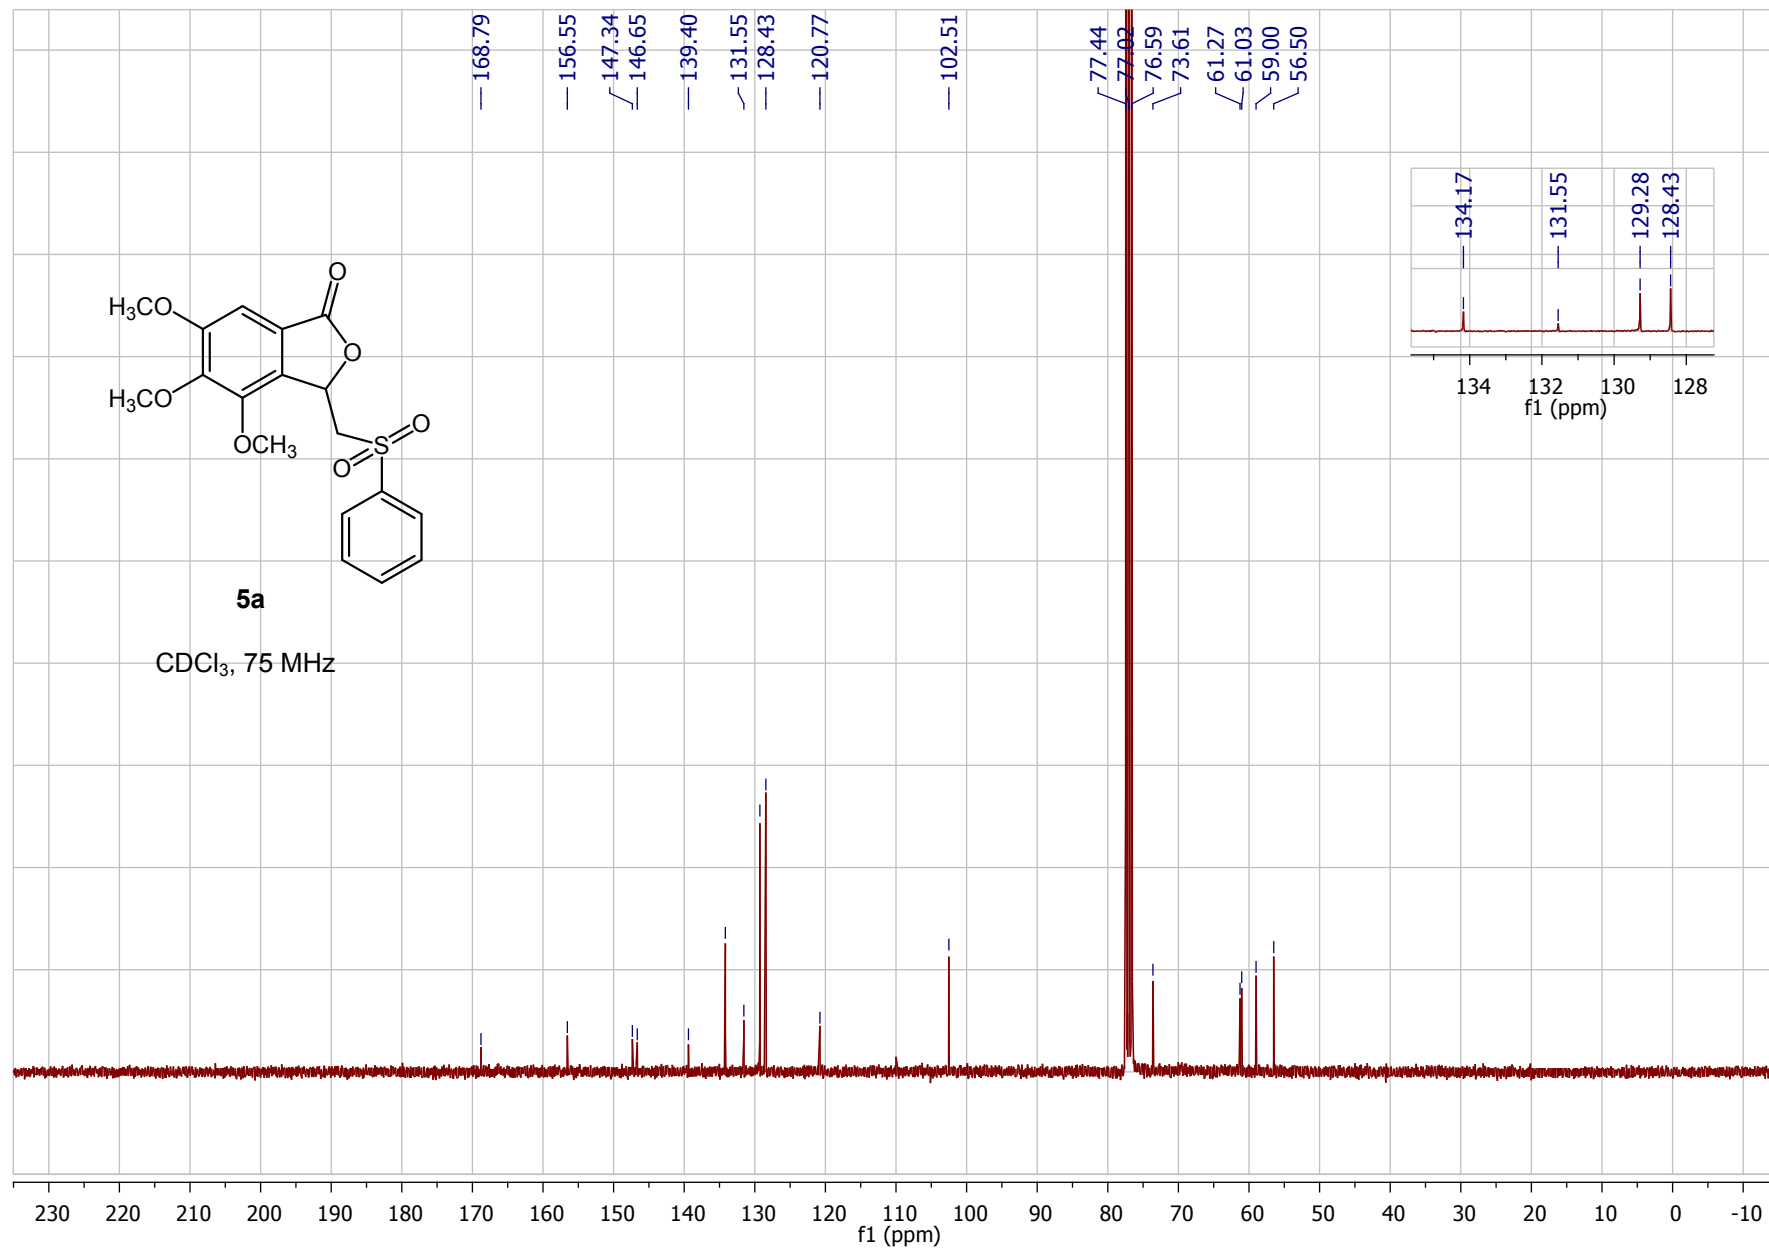

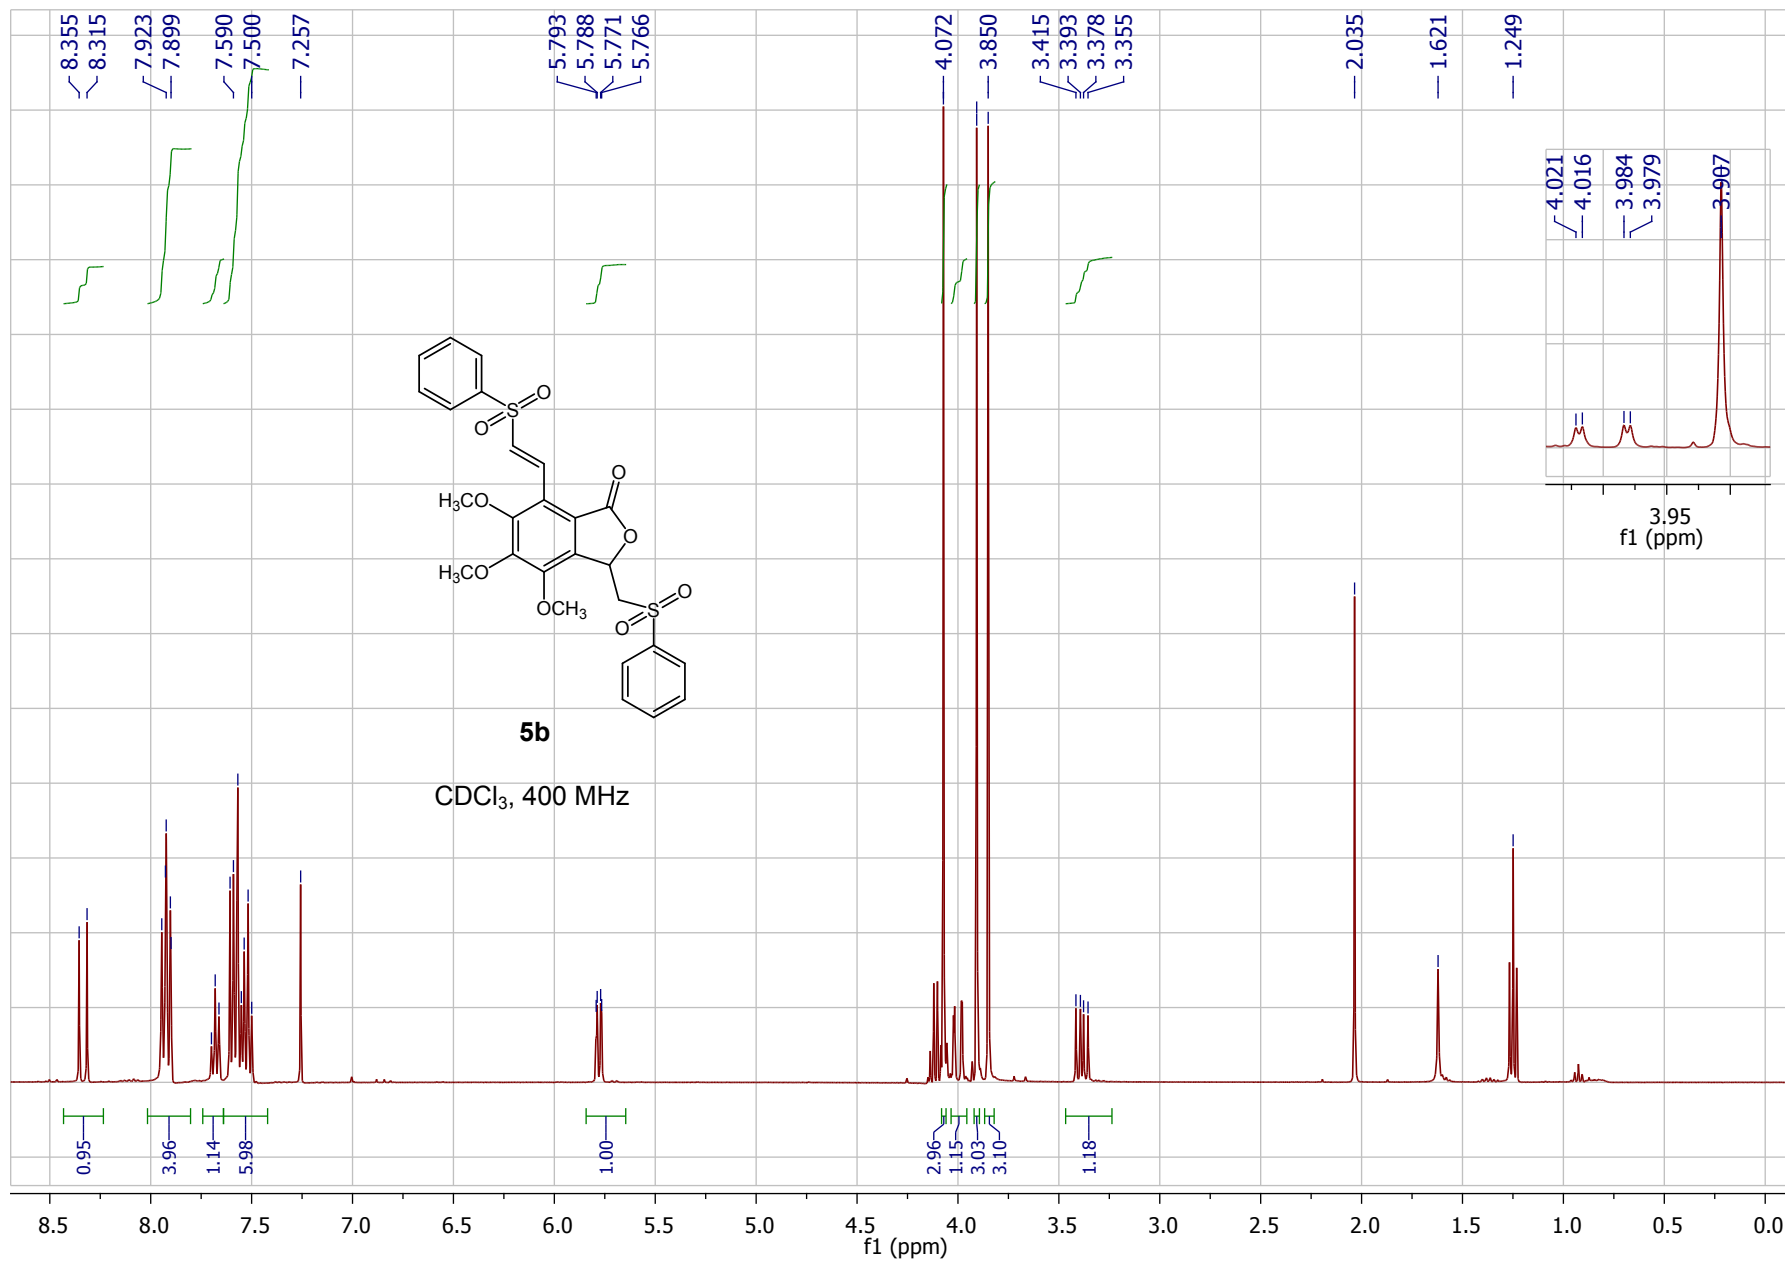

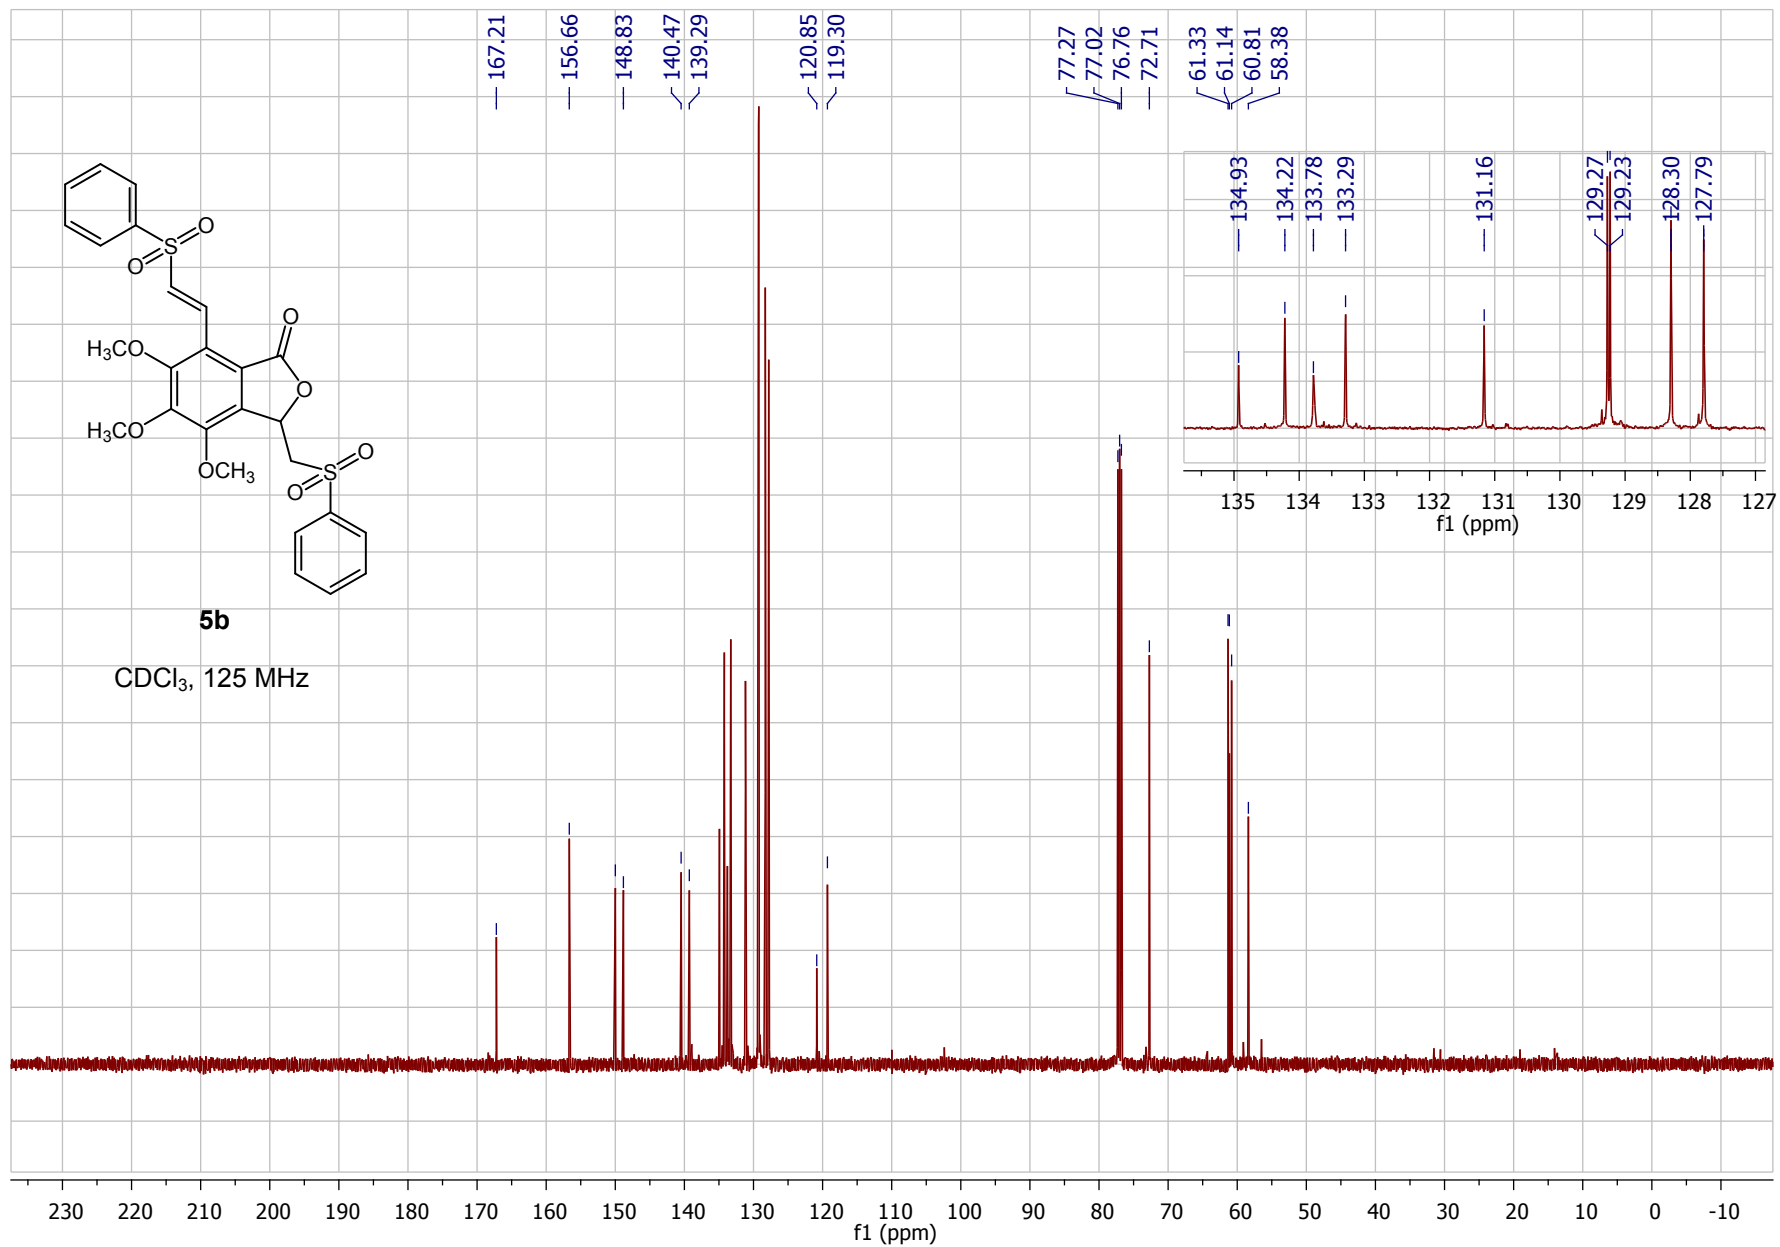

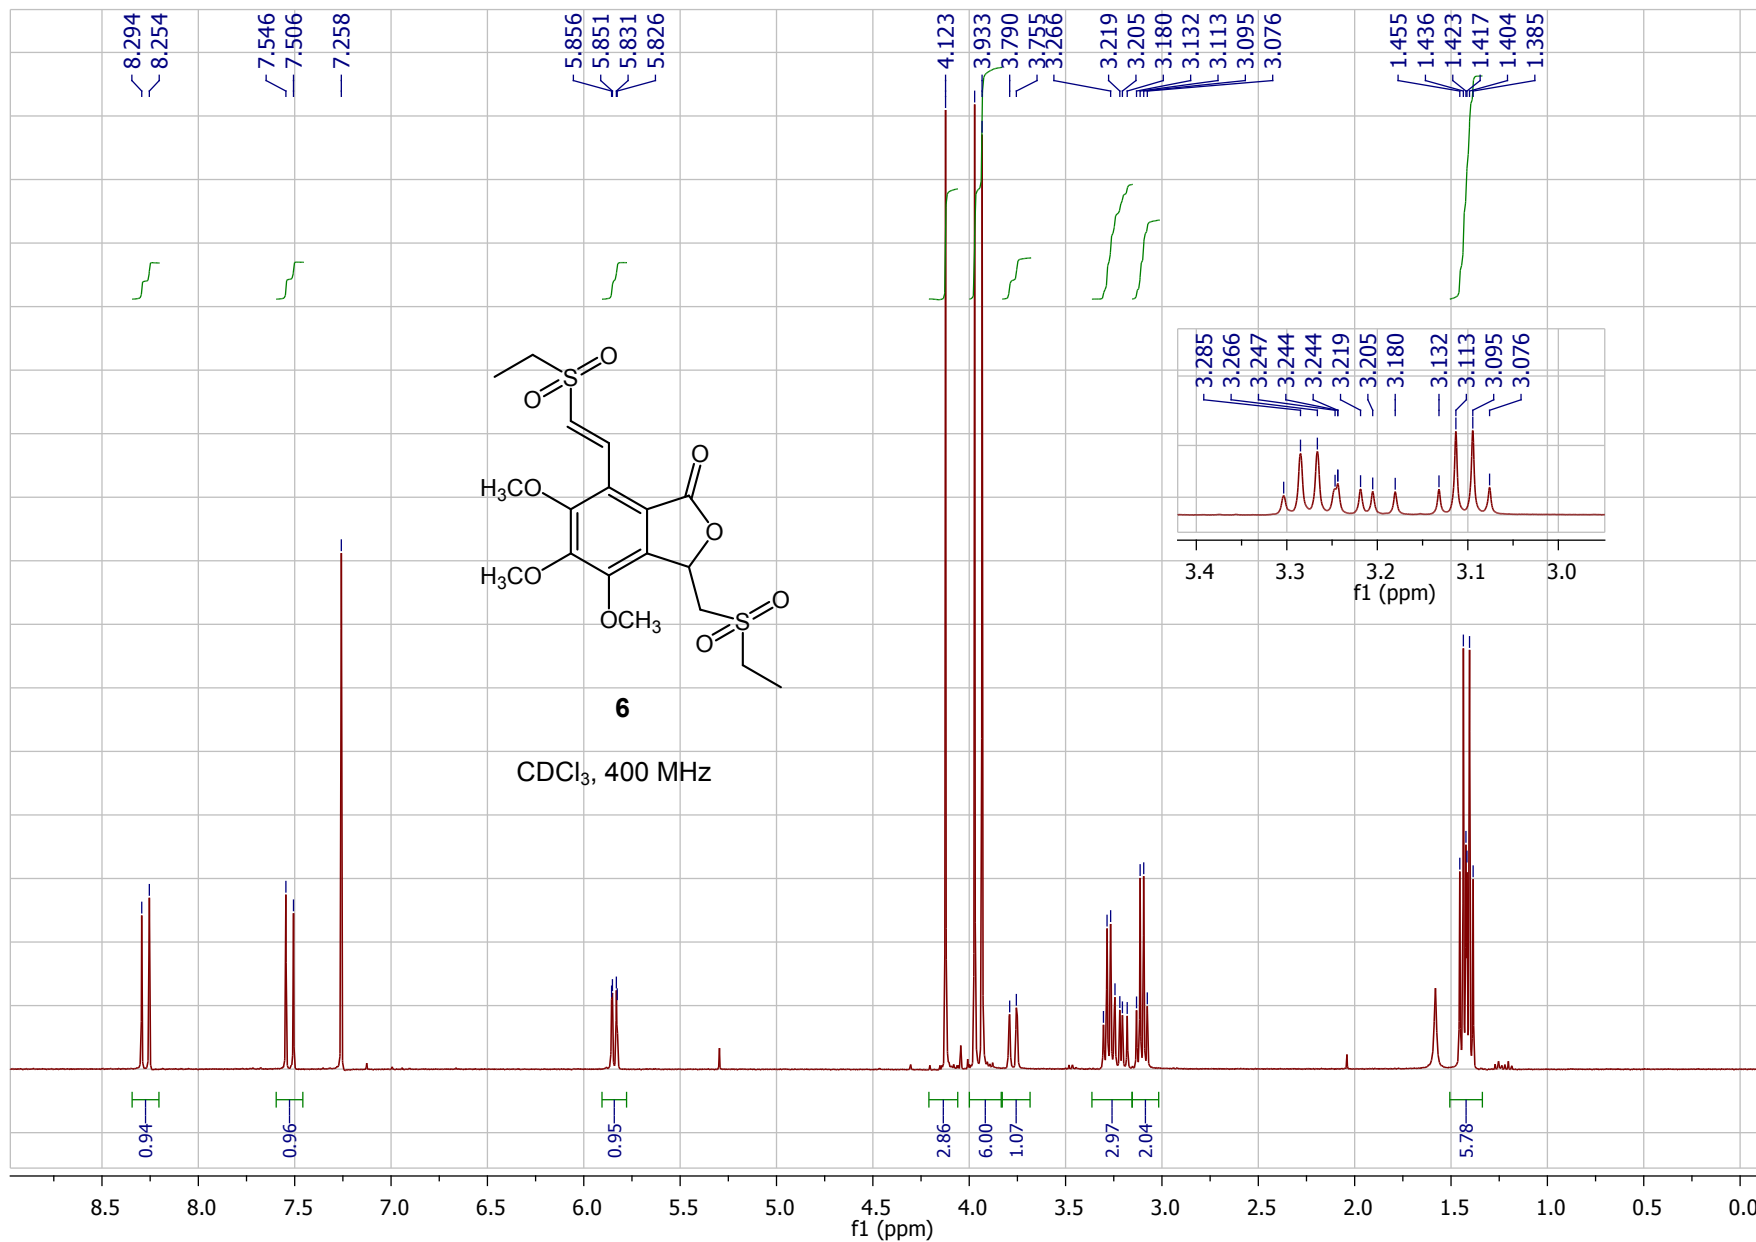



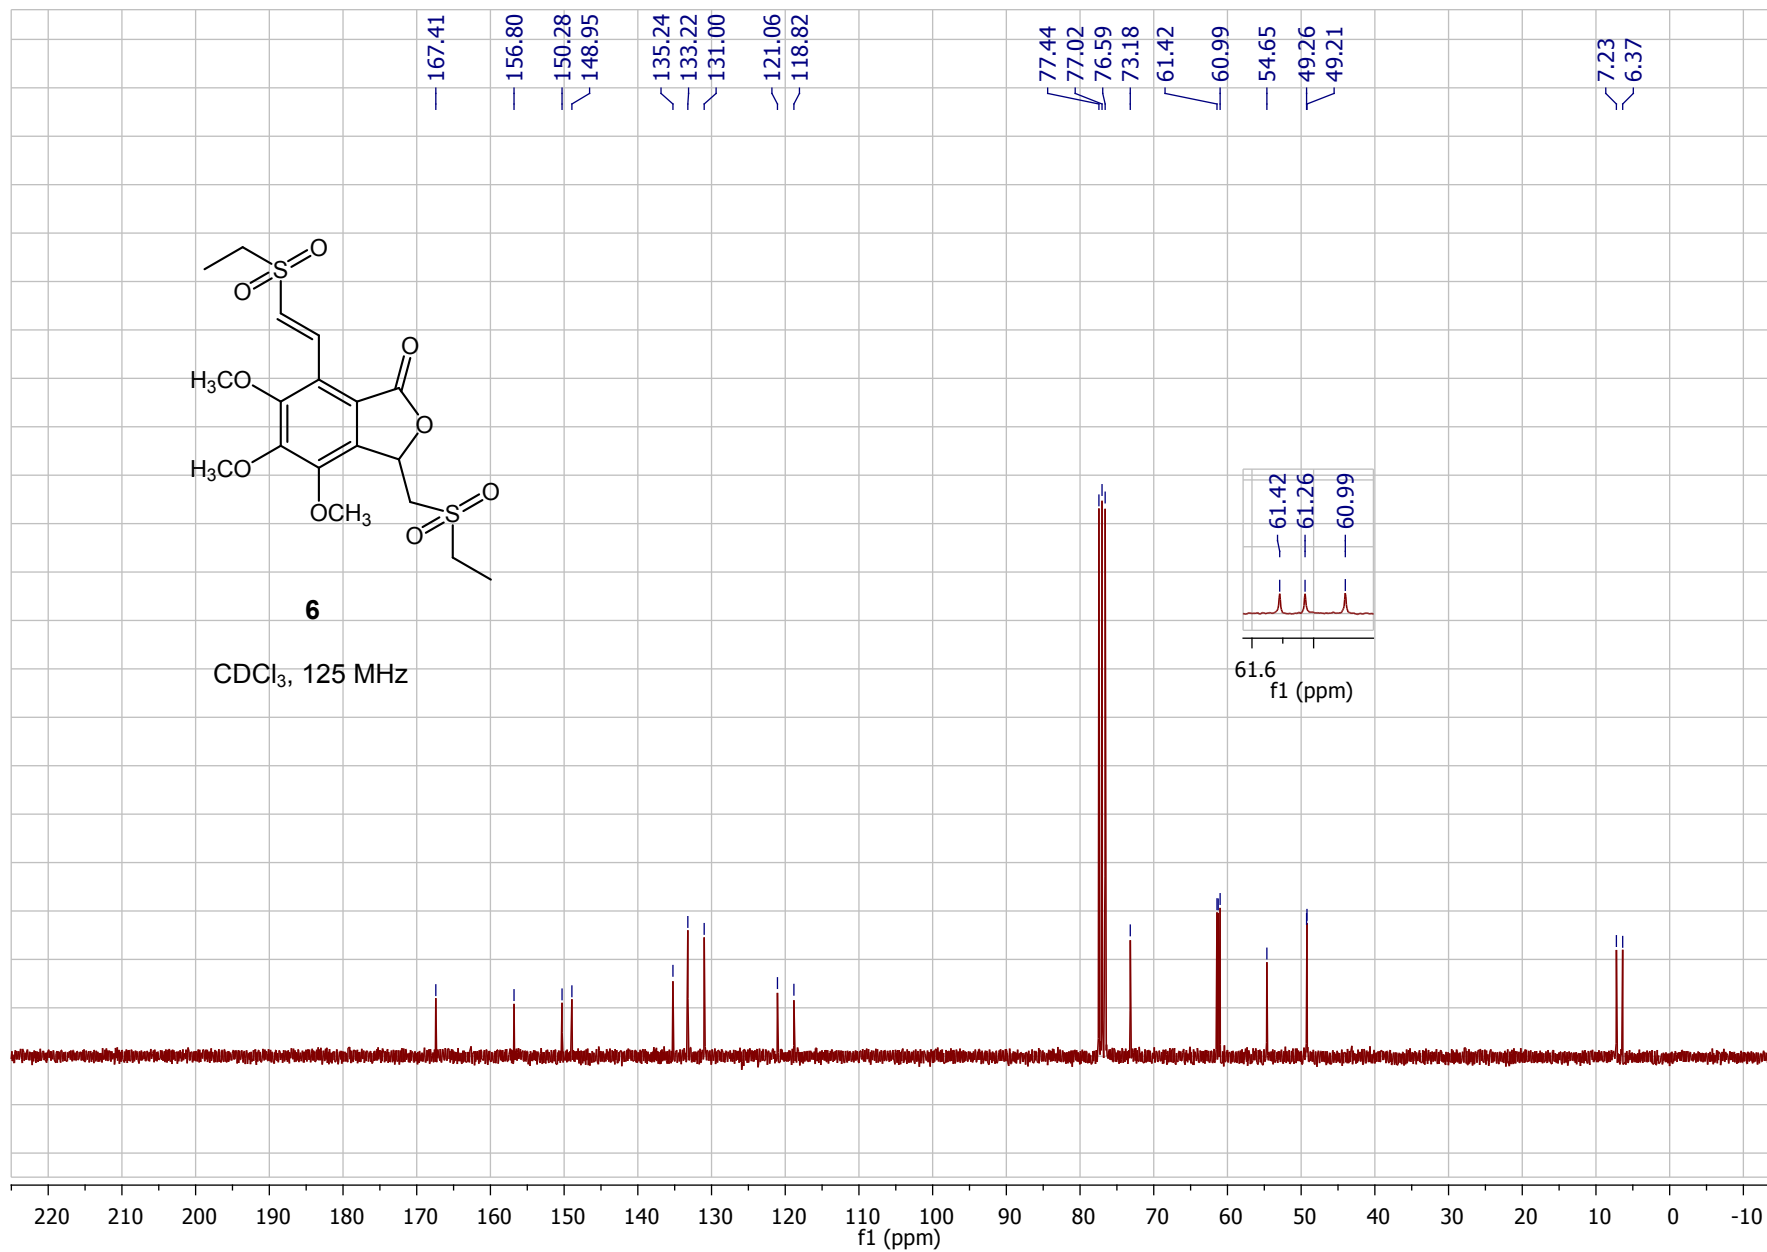

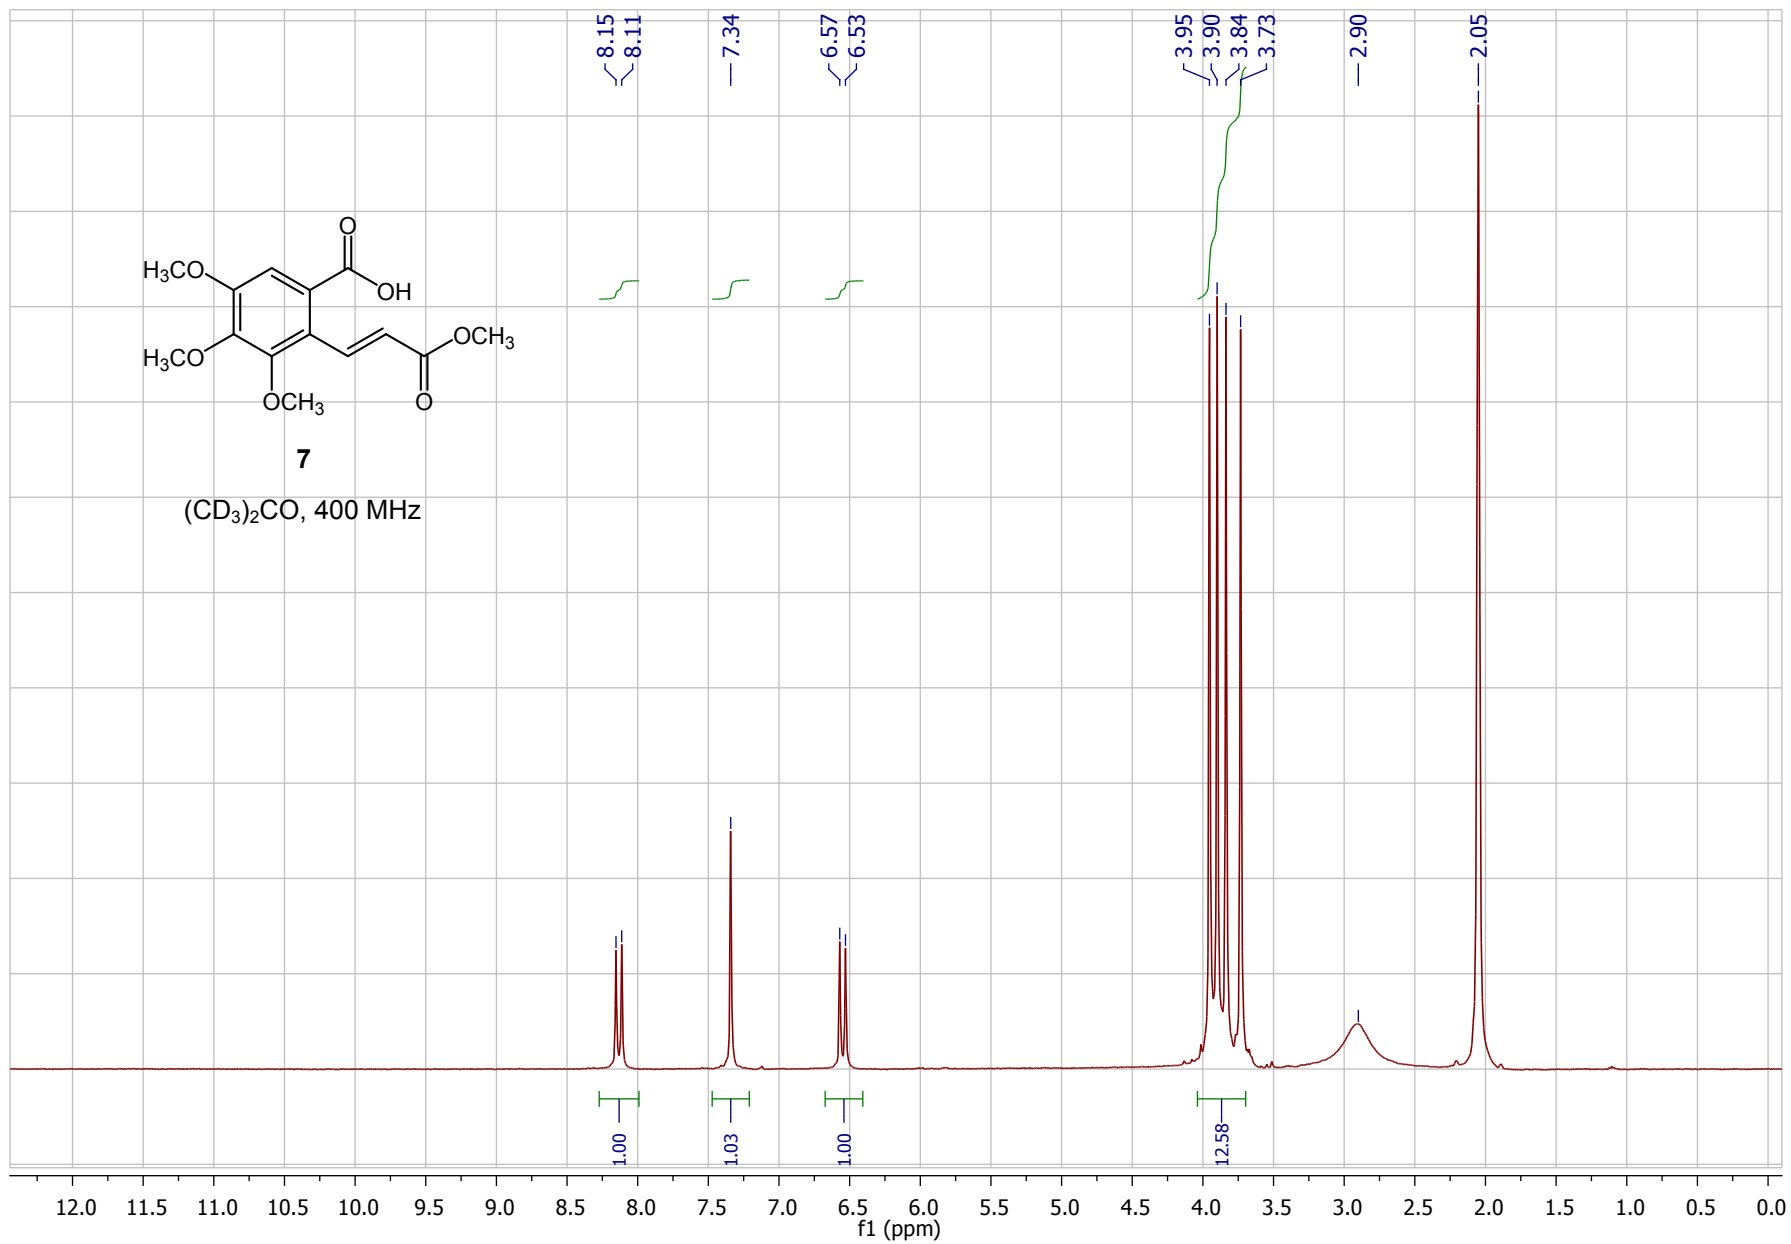

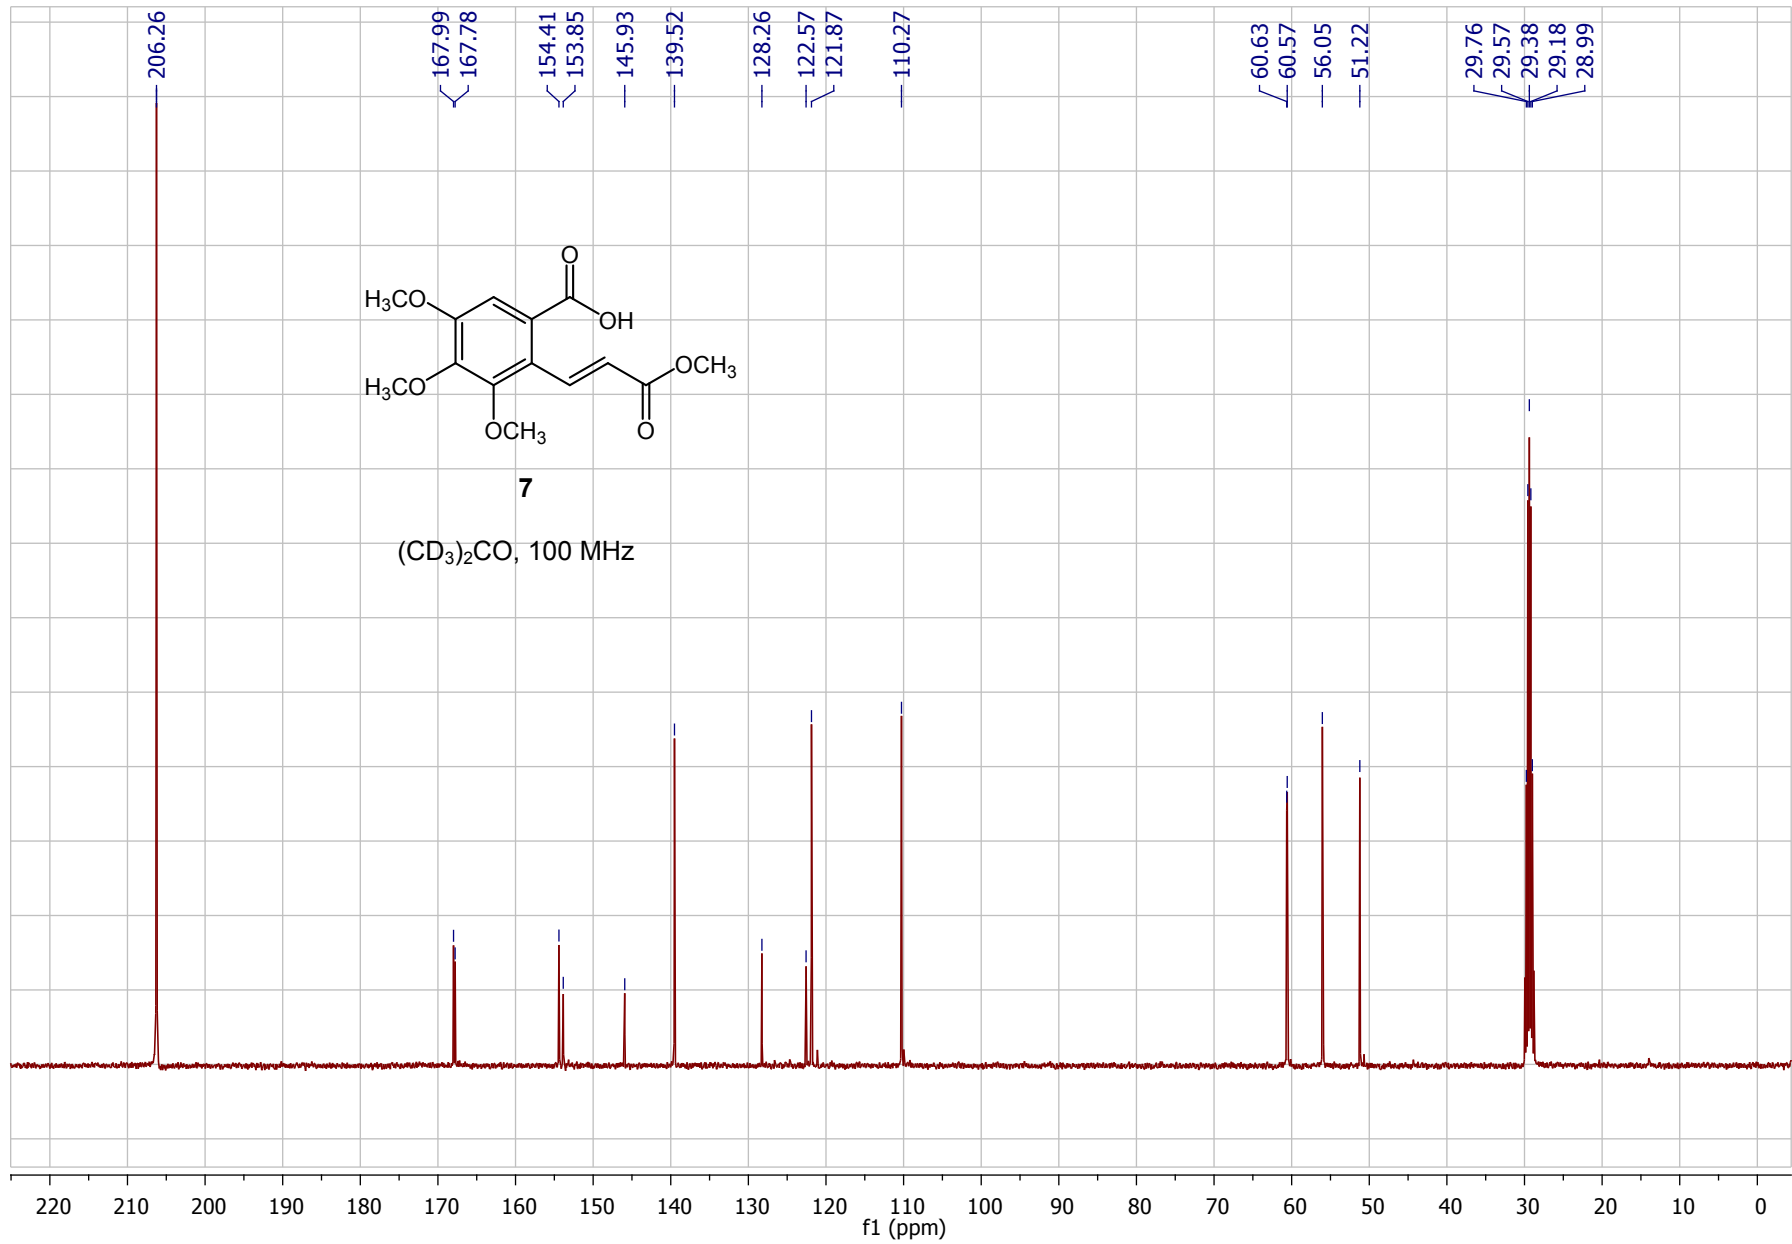

## 10. HRMS spectra of products

120619-12ESIHR-Li-Andrea-AR-56-A-A

6/19/2012 1:55:01 PM

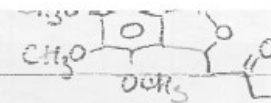

120619-12ESIHR-Li-Andrea-AR-56-A-A#44-54 RT: 0.24-0.27 AV: 11 NL: 1.12E7  
T: FTMS + p ESI Full ms [100.00-1000.00]

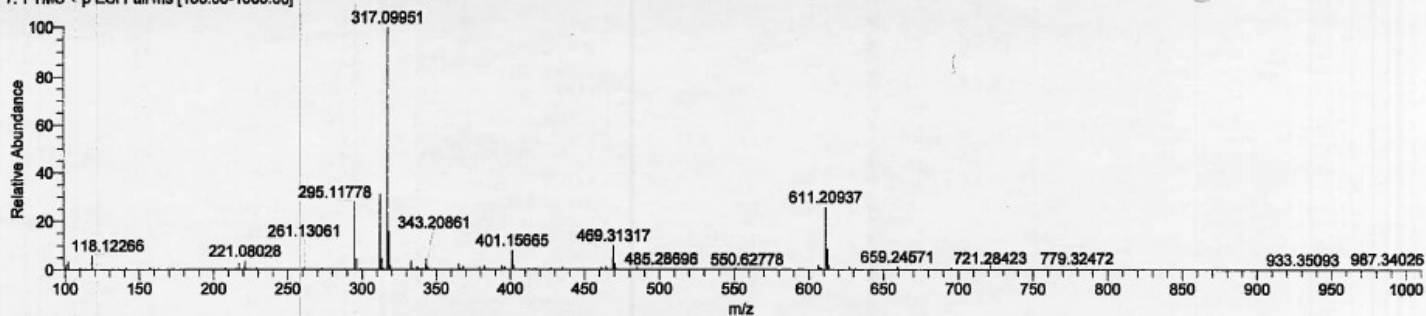

120619-12ESIHR-Li-Andrea-AR-56-A-A#44-54 RT: 0.24-0.27 AV: 11 NL: 3.12E6  
T: FTMS + p ESI Full ms [100.00-1000.00]

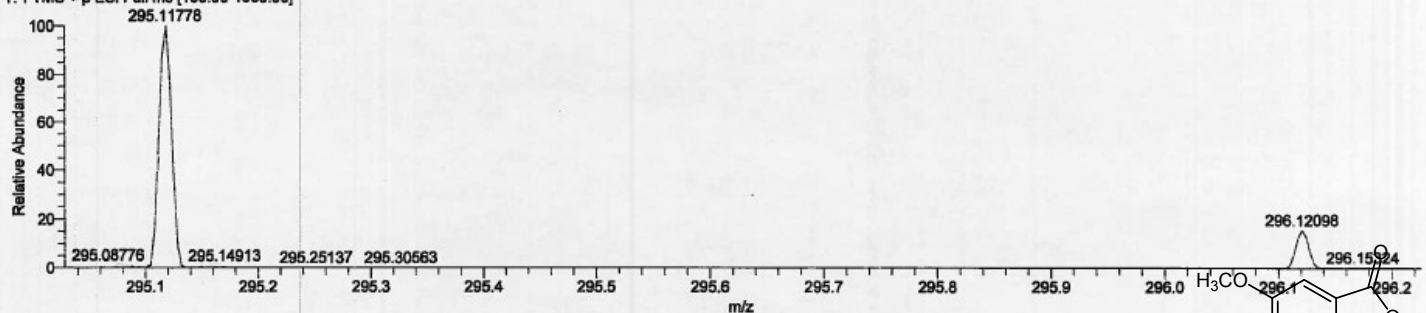

120619-12ESIHR-Li-Andrea-AR-56-A-A#44-54 RT: 0.24-0.27 AV: 11

T: FTMS + p ESI Full ms [100.00-1000.00]

m/z = 295.10125-295.13046

| m/z       | Intensity | Relative | Resolution | Charge | Theo. Mass | Delta (ppm) | RDB equiv. | Composition                                                   |
|-----------|-----------|----------|------------|--------|------------|-------------|------------|---------------------------------------------------------------|
| 295.11778 | 3133532.3 | 100.00   | 23623.09   | 1.00   | 295.11761  | 0.17        | 6.5        | C <sub>15</sub> H <sub>19</sub> O <sub>6</sub>                |
|           |           |          |            |        | 295.11895  | -1.17       | 11.5       | C <sub>16</sub> H <sub>15</sub> O <sub>2</sub> N <sub>4</sub> |
|           |           |          |            |        | 295.11627  | 1.51        | 7.0        | C <sub>13</sub> H <sub>17</sub> O <sub>5</sub> N <sub>3</sub> |
|           |           |          |            |        | 295.12029  | -2.51       | 11.0       | C <sub>18</sub> H <sub>17</sub> O <sub>3</sub> N              |
|           |           |          |            |        | 295.11359  | 4.19        | 2.5        | C <sub>10</sub> H <sub>19</sub> O <sub>8</sub> N <sub>2</sub> |

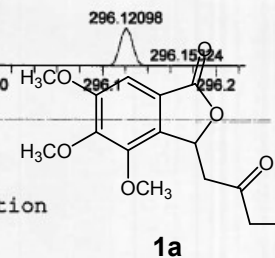

## Mass Spectrum SmartFormula Report

### Analysis Info

Analysis Name D:\Data\Li\2012-12-17-Li-Renzetti AR-276-A +ve DIP.d  
Method APCI\_Tune\_pos\_Mid\_AW2.m  
Sample Name Testing DIP test 22012-12-17-Li-Renzetti AR-276-A +ve D  
Comment

Acquisition Date 12/18/2012 2:25:21 PM  
Operator ADM  
Instrument maXis impact 282001.00044

### Acquisition Parameter

|             |          |                       |            |                  |           |
|-------------|----------|-----------------------|------------|------------------|-----------|
| Source Type | APCI     | Ion Polarity          | Positive   | Set Nebulizer    | 5.0 Bar   |
| Focus       | Active   | Set Capillary         | 4000 V     | Set Dry Heater   | 150 °C    |
| Scan Begin  | 100 m/z  | Set End Plate Offset  | -500 V     | Set Dry Gas      | 1.0 l/min |
| Scan End    | 3000 m/z | Set Collision Cell RF | 1000.0 Vpp | Set Divert Valve | Source    |

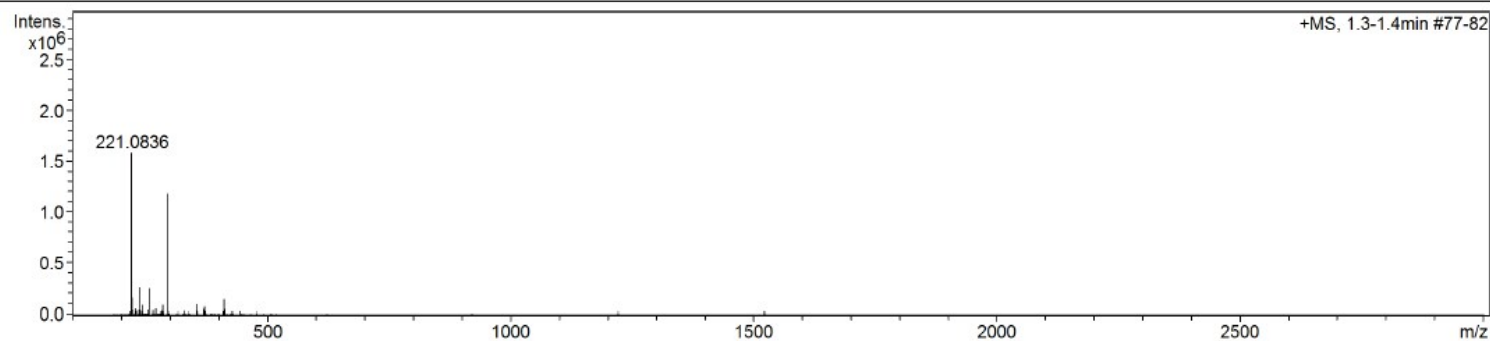

| Meas. m/z | # | Ion Formula | m/z      | err [ppm] | mSigma | Score | rdb    | e <sup>-</sup> Conf | N-Rule  |
|-----------|---|-------------|----------|-----------|--------|-------|--------|---------------------|---------|
| 295.1185  | 1 | C15H19O6    | 295.1176 | -3.0      | 20.4   | 1     | 100.00 | 6.5                 | even ok |

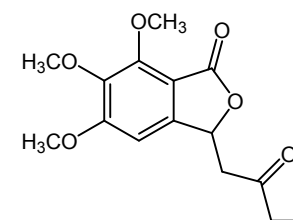

**1b**

# Mass Spectrum SmartFormula Report

## Analysis Info

Analysis Name: D:\Data\Li\2013-04-29-Li-Renzetti-AR-358-A ESI +ve.d  
 Method: Tune\_pos\_Low\_Na\_Formate\_100-1000.m  
 Sample Name: 2013-04-29-Li-Renzetti-AR-358-A ESI +ve  
 Comment:

Acquisition Date: 4/29/2013 3:14:02 PM  
 Operator: ADM  
 Instrument: maXis impact 282001.00044

## Acquisition Parameter

|             |          |                       |           |                  |           |
|-------------|----------|-----------------------|-----------|------------------|-----------|
| Source Type | ESI      | Ion Polarity          | Positive  | Set Nebulizer    | 0.3 Bar   |
| Focus       | Active   | Set Capillary         | 4500 V    | Set Dry Heater   | 180 °C    |
| Scan Begin  | 100 m/z  | Set End Plate Offset  | -500 V    | Set Dry Gas      | 4.0 l/min |
| Scan End    | 1000 m/z | Set Collision Cell RF | 600.0 Vpp | Set Divert Valve | Source    |

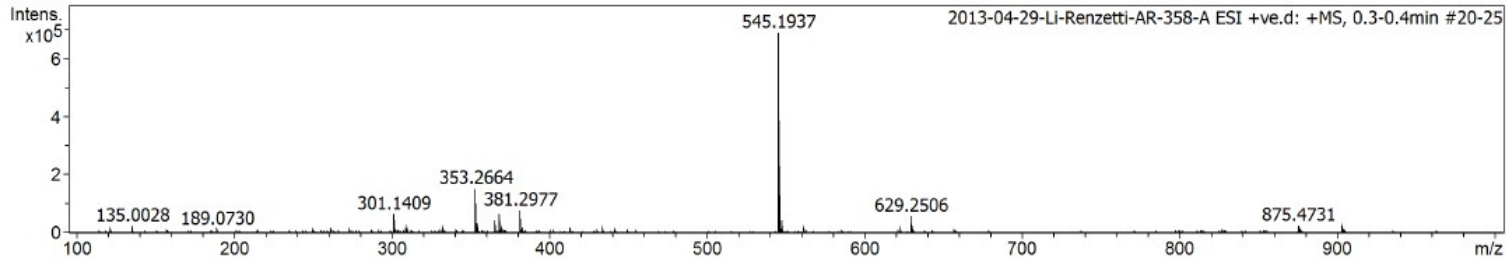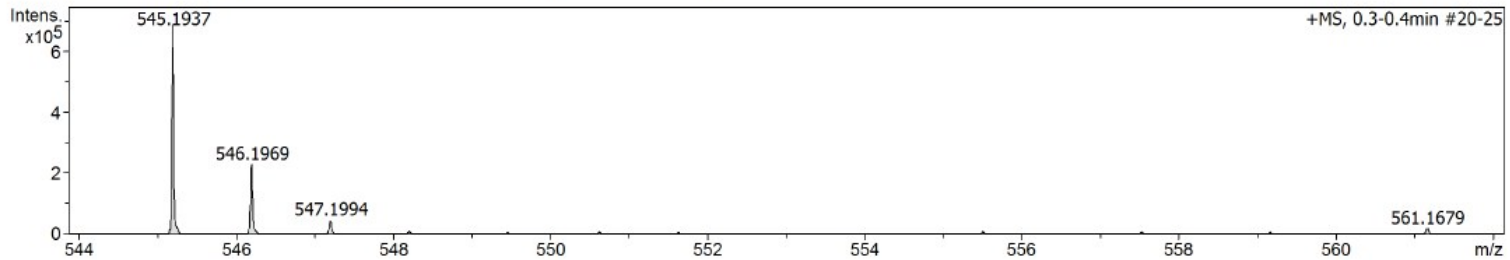

| Meas. m/z | # | Ion Formula  | m/z      | err [ppm] | mSigma | # Sigma | Score  | rdB  | e <sup>-</sup> Conf | N-Rule |
|-----------|---|--------------|----------|-----------|--------|---------|--------|------|---------------------|--------|
| 545.1937  | 1 | C33H30NaO6   | 545.1935 | 0.5       | 17.0   | 1       | 100.00 | 18.5 | even                | ok     |
|           | 2 | C34H26N4NaO2 | 545.1948 | 1.9       | 28.3   | 2       | 52.62  | 23.5 | even                | ok     |

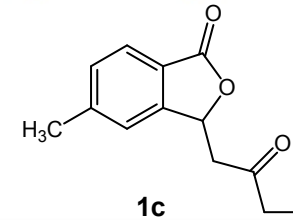

## Mass Spectrum SmartFormula Report

### Analysis Info

Analysis Name D:\Data\Li\2012-12-17-Li-Renzetti AR-320-A 2 +ve.d  
Method Tune\_pos\_low\_AW\_NaFormate\_cal\_100-2000.m  
Sample Name 2012-12-17-Li-Renzetti AR-320-A +ve 2  
Comment

Acquisition Date 12/19/2012 3:26:47 PM  
Operator ADM  
Instrument maXis impact 282001.00044

### Acquisition Parameter

|             |          |                       |           |                  |           |
|-------------|----------|-----------------------|-----------|------------------|-----------|
| Source Type | ESI      | Ion Polarity          | Positive  | Set Nebulizer    | 1.0 Bar   |
| Focus       | Active   | Set Capillary         | 3000 V    | Set Dry Heater   | 200 °C    |
| Scan Begin  | 50 m/z   | Set End Plate Offset  | -500 V    | Set Dry Gas      | 4.0 l/min |
| Scan End    | 2000 m/z | Set Collision Cell RF | 600.0 Vpp | Set Divert Valve | Source    |

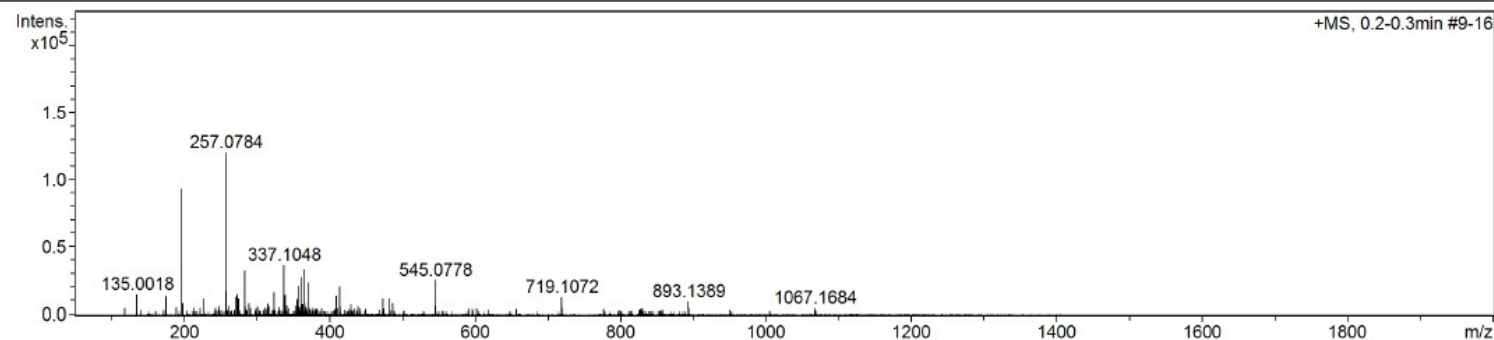

| Meas. m/z | # | Ion Formula | m/z      | err [ppm] | mSigma | Score  | rdb | e <sup>-</sup> Conf | N-Rule |
|-----------|---|-------------|----------|-----------|--------|--------|-----|---------------------|--------|
| 257.0784  | 1 | C13H14NaO4  | 257.0784 | 0.2       | 3.7    | 100.00 | 6.5 | even                | ok     |

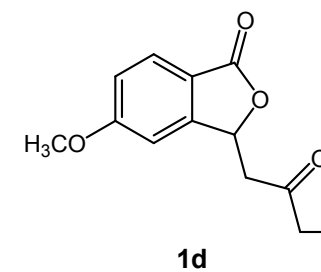



## Mass Spectrum SmartFormula Report

### Analysis Info

Analysis Name D:\Data\Li\2012-12-17-Li-Renzetti AR-327 +ve.d  
 Method Tune\_pos\_low\_AW\_NaFormate\_cal.m  
 Sample Name 2012-12-17-Li-Renzetti AR-327 +ve  
 Comment

Acquisition Date 12/18/2012 10:57:41 AM  
 Operator ADM  
 Instrument maXis impact 282001.00044

### Acquisition Parameter

|             |          |                       |           |                  |           |
|-------------|----------|-----------------------|-----------|------------------|-----------|
| Source Type | ESI      | Ion Polarity          | Positive  | Set Nebulizer    | 1.0 Bar   |
| Focus       | Active   | Set Capillary         | 3000 V    | Set Dry Heater   | 200 °C    |
| Scan Begin  | 50 m/z   | Set End Plate Offset  | -500 V    | Set Dry Gas      | 4.0 l/min |
| Scan End    | 3000 m/z | Set Collision Cell RF | 600.0 Vpp | Set Divert Valve | Source    |

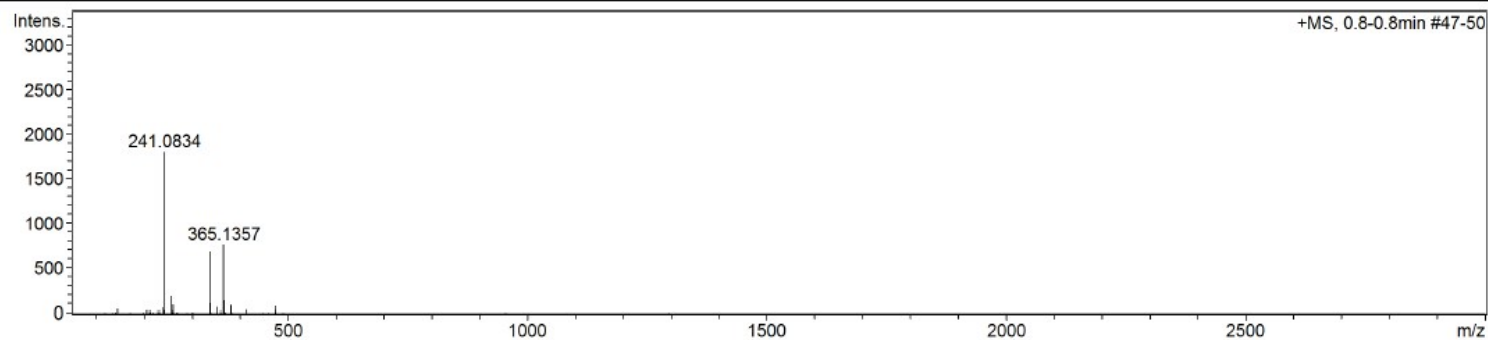

| Meas. m/z | # | Ion Formula                                      | m/z      | err [ppm] | mSigma | Score  | rdb | e <sup>-</sup> Conf | N-Rule |
|-----------|---|--------------------------------------------------|----------|-----------|--------|--------|-----|---------------------|--------|
| 241.0834  | 1 | C <sub>13</sub> H <sub>14</sub> NaO <sub>3</sub> | 241.0835 | 0.5       | 10.3   | 100.00 | 6.5 | even                | ok     |

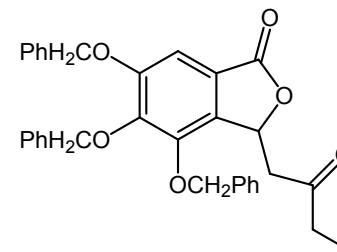

**1e**

## Mass Spectrum SmartFormula Report

|                      |                                                         |                                             |                           |
|----------------------|---------------------------------------------------------|---------------------------------------------|---------------------------|
| <b>Analysis Info</b> |                                                         | <b>Acquisition Date</b> 8/6/2013 4:29:51 PM |                           |
| <b>Analysis Name</b> | D:\Data\LI\2013-08-06-LI-Renzetti AR-440-CR-1 ESI +ve.d | <b>Operator</b>                             | ADM                       |
| <b>Method</b>        | Tune_pos_Low_Na_Formate_100-1000.m                      | <b>Instrument</b>                           | maXis impact 282001.00044 |
| <b>Sample Name</b>   | 2013-08-06-LI-Renzetti AR-440-CR-1 ESI +ve              | <b>Comment</b>                              |                           |

|                              |          |                              |           |
|------------------------------|----------|------------------------------|-----------|
| <b>Acquisition Parameter</b> |          |                              |           |
| <b>Source Type</b>           | ESI      | <b>Ion Polarity</b>          | Positive  |
| <b>Focus</b>                 | Active   | <b>Set Capillary</b>         | -450 V    |
| <b>Scan Begin</b>            | 100 m/z  | <b>Set End Plate Offset</b>  | -500 V    |
| <b>Scan End</b>              | 1000 m/z | <b>Set Collision Cell RF</b> | 900.0 Vpp |
|                              |          | <b>Set Nebulizer</b>         | 0.6 Bar   |
|                              |          | <b>Set Dry Heats</b>         | 180 °C    |
|                              |          | <b>Set Dry Gas</b>           | 4.0 l/min |
|                              |          | <b>Set Divert Valve</b>      | Source    |

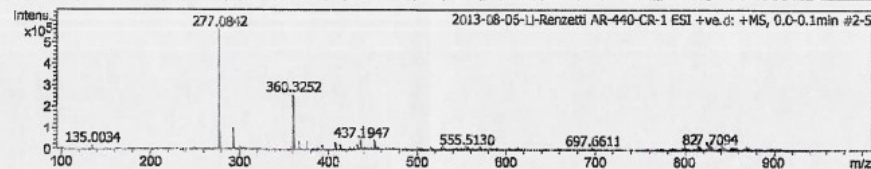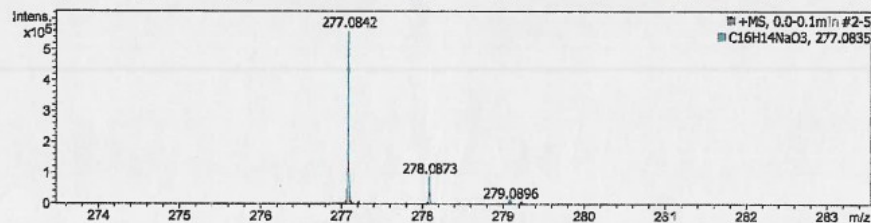

| Meas. m/z | # | Ion Formula | m/z      | err [ppm] | mSigma | # Sigma | Score  | rdb | e <sup>-</sup> Conf | N-Rule |
|-----------|---|-------------|----------|-----------|--------|---------|--------|-----|---------------------|--------|
| 277.0842  | 1 | C16H14NaO3  | 277.0835 | 2.6       | 9.7    | 1       | 100.00 | 9.5 | even                | ok     |

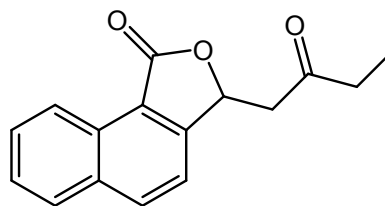

**1f**

## Mass Spectrum SmartFormula Report

### Analysis Info

Analysis Name D:\Data\Li\2012-12-17-Li-Renzetti AR-325-A +ve.d  
Method Tune\_pos\_low\_AW\_NaFormate\_cal.m  
Sample Name 2012-12-17-Li-Renzetti AR-325-A +ve  
Comment

Acquisition Date 12/18/2012 4:44:33 PM  
Operator ADM  
Instrument maXis impact 282001.00044

### Acquisition Parameter

|             |          |                       |           |                  |           |
|-------------|----------|-----------------------|-----------|------------------|-----------|
| Source Type | ESI      | Ion Polarity          | Positive  | Set Nebulizer    | 1.0 Bar   |
| Focus       | Active   | Set Capillary         | 3000 V    | Set Dry Heater   | 200 °C    |
| Scan Begin  | 50 m/z   | Set End Plate Offset  | -500 V    | Set Dry Gas      | 4.0 l/min |
| Scan End    | 3000 m/z | Set Collision Cell RF | 600.0 Vpp | Set Divert Valve | Source    |

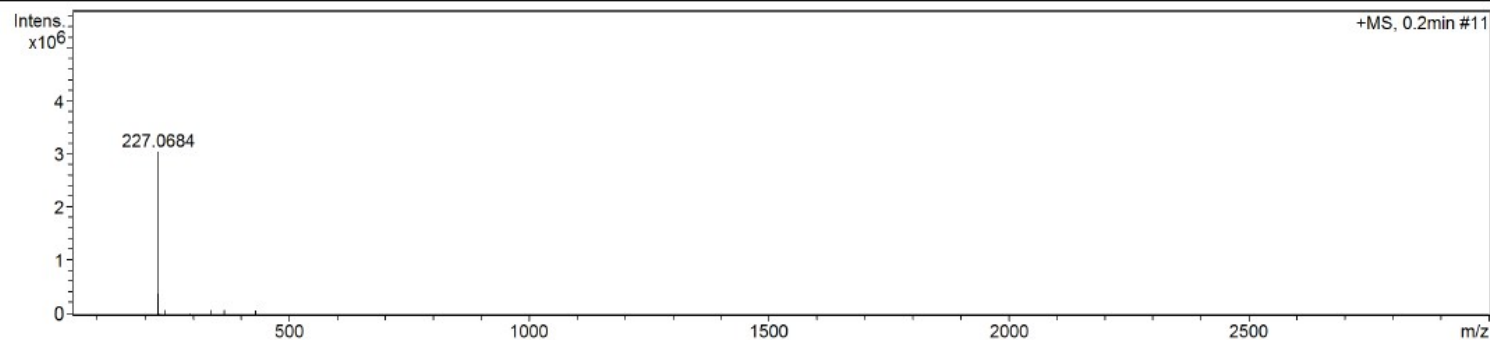

| Meas. m/z | # | Ion Formula                                      | m/z      | err [ppm] | mSigma | Score | rdb    | e <sup>-</sup> Conf | N-Rule |
|-----------|---|--------------------------------------------------|----------|-----------|--------|-------|--------|---------------------|--------|
| 227.0684  | 1 | C <sub>12</sub> H <sub>12</sub> NaO <sub>3</sub> | 227.0679 | -2.2      | 7.6    | 1     | 100.00 | 6.5 even            | ok     |

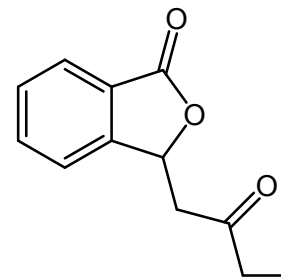

1g

## Mass Spectrum SmartFormula Report

### Analysis Info

Analysis Name: D:\Data\Li\2013-04-29-Li-Renzetti-AR-378-A ESI +ve.d  
 Method: Tune\_pos\_Low\_Na\_Formate\_100-1000.m  
 Sample Name: 2013-04-29-Li-Renzetti-AR-378-A ESI +ve  
 Comment:

Acquisition Date: 4/29/2013 3:35:54 PM

Operator: ADM  
 Instrument: maXis impact 282001.00044

### Acquisition Parameter

|             |          |                       |           |                  |           |
|-------------|----------|-----------------------|-----------|------------------|-----------|
| Source Type | ESI      | Ion Polarity          | Positive  | Set Nebulizer    | 0.3 Bar   |
| Focus       | Active   | Set Capillary         | 4500 V    | Set Dry Heater   | 180 °C    |
| Scan Begin  | 100 m/z  | Set End Plate Offset  | -500 V    | Set Dry Gas      | 4.0 l/min |
| Scan End    | 1000 m/z | Set Collision Cell RF | 600.0 Vpp | Set Divert Valve | Source    |

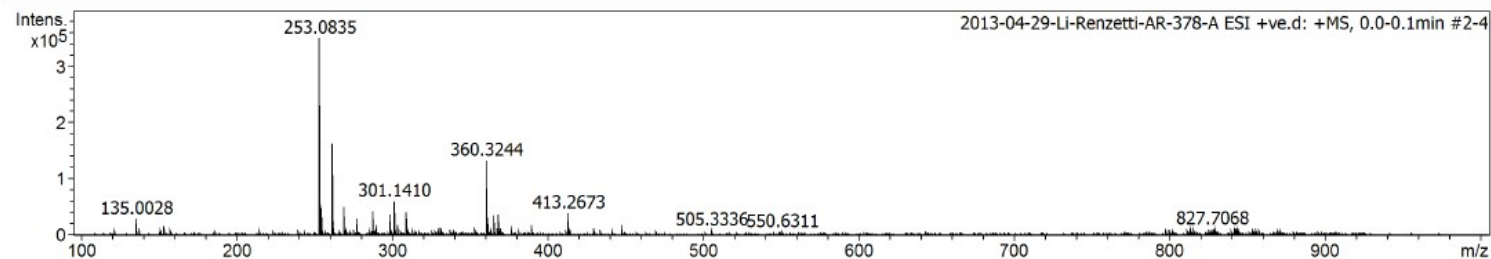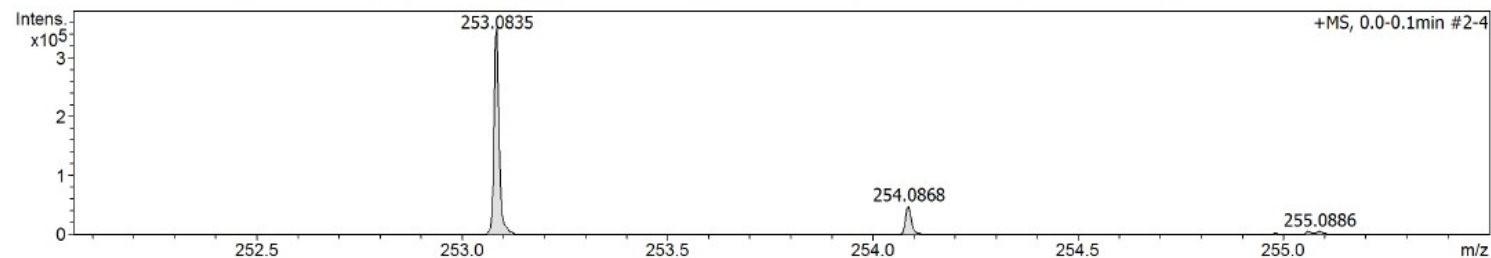

| Meas. m/z | # | Ion Formula                                      | m/z      | err [ppm] | mSigma | # Sigma | Score  | rdb | e <sup>-</sup> Conf | N-Rule |
|-----------|---|--------------------------------------------------|----------|-----------|--------|---------|--------|-----|---------------------|--------|
| 253.0835  | 1 | C <sub>14</sub> H <sub>14</sub> NaO <sub>3</sub> | 253.0835 | 0.1       | 9.5    | 1       | 100.00 | 7.5 | even                | ok     |

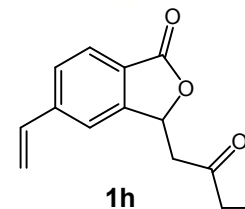

## Mass Spectrum SmartFormula Report

**Analysis Info**

Analysis Name: D:\Data\Li\2013-04-29-Li-Renzetti-AR-377-ALL-A ESI +ve.d  
 Method: Tune\_pos\_Low\_Na\_Formate\_100-1000.m  
 Sample Name: 2013-04-29-Li-Renzetti-AR-377-ALL-A ESI +ve  
 Comment:

Acquisition Date: 4/29/2013 4:05:49 PM  
 Operator: ADM  
 Instrument: maXis impact 282001.00044

**Acquisition Parameter**

|             |          |                       |           |                  |           |
|-------------|----------|-----------------------|-----------|------------------|-----------|
| Source Type | ESI      | Ion Polarity          | Positive  | Set Nebulizer    | 0.3 Bar   |
| Focus       | Active   | Set Capillary         | 4500 V    | Set Dry Heater   | 180 °C    |
| Scan Begin  | 100 m/z  | Set End Plate Offset  | -500 V    | Set Dry Gas      | 4.0 l/min |
| Scan End    | 1000 m/z | Set Collision Cell RF | 600.0 Vpp | Set Divert Valve | Source    |

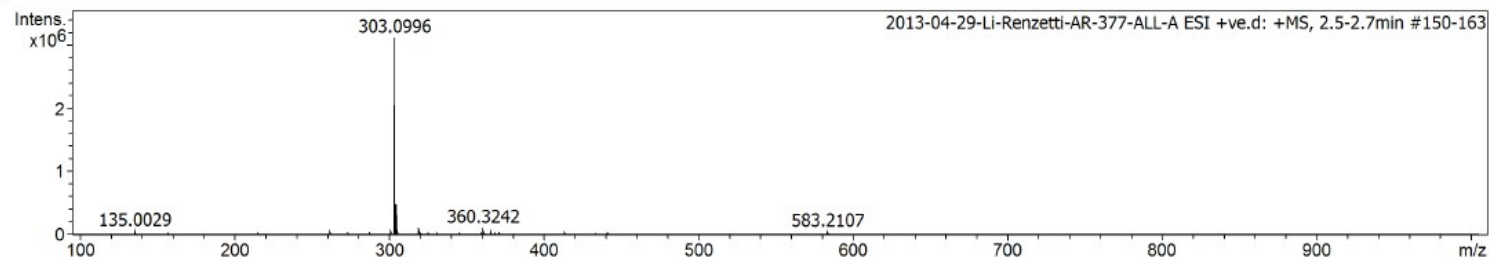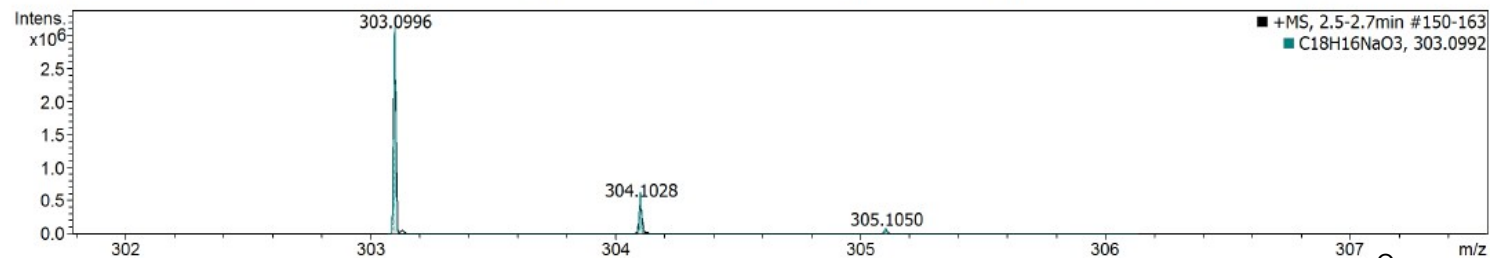

| Meas. m/z | # | Ion Formula | m/z      | err [ppm] | mSigma | # Sigma | Score  | rdb  | e <sup>-</sup> Conf | N-Rule |
|-----------|---|-------------|----------|-----------|--------|---------|--------|------|---------------------|--------|
| 303.0996  | 1 | C18H16NaO3  | 303.0992 | 1.4       | 25.2   | 1       | 100.00 | 10.5 | even                | ok     |
| 319.0729  | 1 | C18H16KO3   | 319.0731 | -0.5      | 11.2   | 1       | 100.00 | 10.5 | even                | ok     |

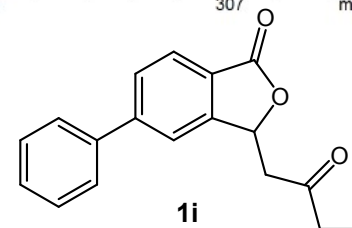

# Mass Spectrum SmartFormula Report

## Analysis Info

Analysis Name D:\Data\Li\2012-12-17-Li-Renzetti AR-323-A +ve.d  
Method Tune\_pos\_low\_AW\_NaFormate\_cal.m  
Sample Name 2012-12-17-Li-Renzetti AR-323-A +ve  
Comment

Acquisition Date 12/18/2012 11:05:42 AM  
Operator ADM  
Instrument maXis impact 282001.00044

## Acquisition Parameter

|             |          |                       |           |                  |           |
|-------------|----------|-----------------------|-----------|------------------|-----------|
| Source Type | ESI      | Ion Polarity          | Positive  | Set Nebulizer    | 1.0 Bar   |
| Focus       | Active   | Set Capillary         | 3000 V    | Set Dry Heater   | 200 °C    |
| Scan Begin  | 50 m/z   | Set End Plate Offset  | -500 V    | Set Dry Gas      | 4.0 l/min |
| Scan End    | 3000 m/z | Set Collision Cell RF | 600.0 Vpp | Set Divert Valve | Source    |

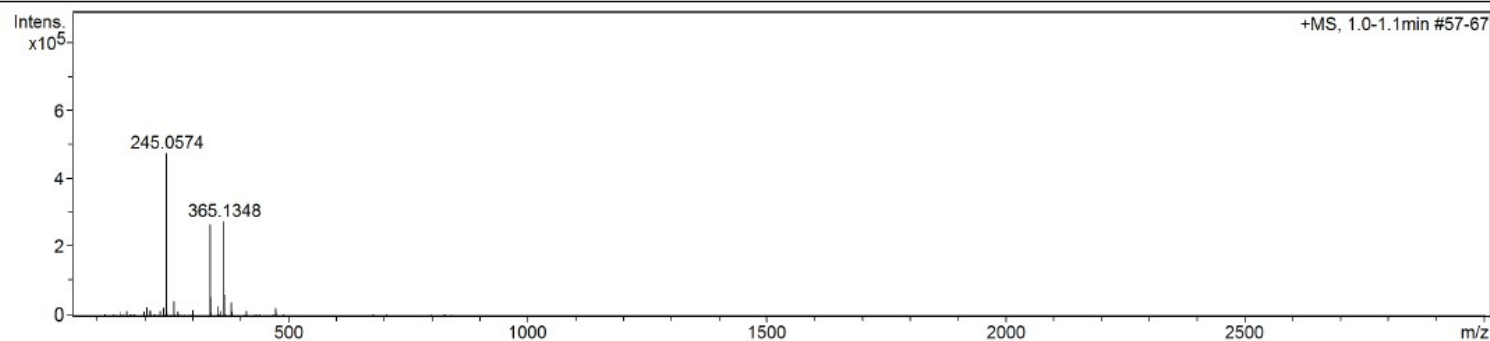

| Meas. m/z | # | Ion Formula   | m/z      | err [ppm] | mSigma | Score | rdb    | e <sup>-</sup> Conf | N-Rule |
|-----------|---|---------------|----------|-----------|--------|-------|--------|---------------------|--------|
| 245.0574  | 1 | C2H9F3N6NaO3  | 245.0580 | 2.7       | 39.4   | 3     | 61.89  | -0.5 even           | ok     |
|           | 2 | C7H10F2N3NaO3 | 245.0582 | 3.5       | 14.4   | 2     | 100.00 | 3.0 odd             | ok     |
|           | 3 | C12H11FNaO3   | 245.0584 | 4.3       | 10.7   | 1     | 95.92  | 6.5 even            | ok     |

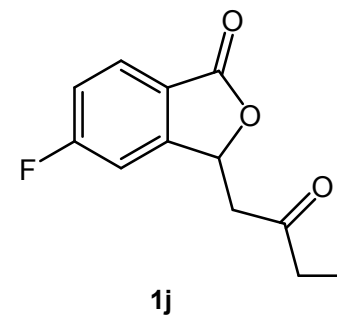



## Mass Spectrum SmartFormula Report

### Analysis Info

Analysis Name D:\Data\Li\2012-12-17-Li-Renzetti AR-324-A +ve.d  
Method Tune\_pos\_low\_AW\_NaFormate\_cal.m  
Sample Name 2012-12-17-Li-Renzetti AR-324A +ve  
Comment

Acquisition Date 12/18/2012 11:11:38 AM  
Operator ADM  
Instrument maXis impact 282001.00044

### Acquisition Parameter

|             |          |                       |           |                  |           |
|-------------|----------|-----------------------|-----------|------------------|-----------|
| Source Type | ESI      | Ion Polarity          | Positive  | Set Nebulizer    | 1.0 Bar   |
| Focus       | Active   | Set Capillary         | 3000 V    | Set Dry Heater   | 200 °C    |
| Scan Begin  | 50 m/z   | Set End Plate Offset  | -500 V    | Set Dry Gas      | 4.0 l/min |
| Scan End    | 3000 m/z | Set Collision Cell RF | 600.0 Vpp | Set Divert Valve | Source    |

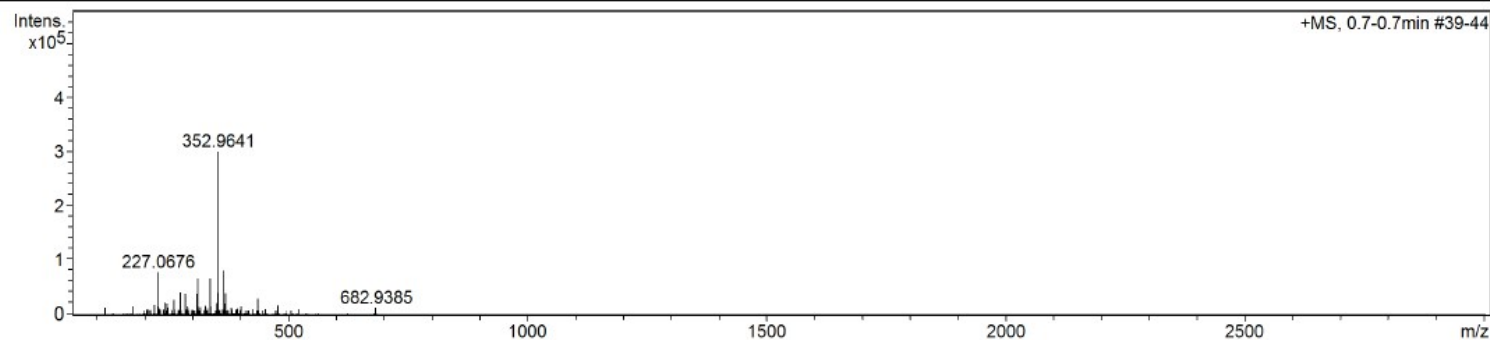

| Meas. m/z | # | Ion Formula                                       | m/z      | err [ppm] | mSigma | Score | rdb    | e <sup>-</sup> Conf | N-Rule |
|-----------|---|---------------------------------------------------|----------|-----------|--------|-------|--------|---------------------|--------|
| 352.9641  | 1 | C <sub>12</sub> H <sub>11</sub> INaO <sub>3</sub> | 352.9645 | 1.3       | 4.3    | 1     | 100.00 | 6.5 even            | ok     |

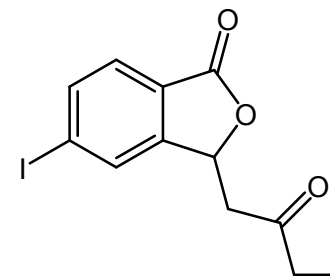

1k

## Mass Spectrum SmartFormula Report

### Analysis Info

Analysis Name: D:\Data\Li\2013-04-29-Li-Renzetti-AR-380-A ESI +ve.d  
 Method: Tune\_pos\_Low\_Na\_Formate\_100-1000.m  
 Sample Name: 2013-04-29-Li-Renzetti-AR-380-A ESI +ve  
 Comment:

Acquisition Date: 4/29/2013 4:57:59 PM  
 Operator: ADM  
 Instrument: maXis impact 282001.00044

### Acquisition Parameter

|             |          |                       |           |                  |           |
|-------------|----------|-----------------------|-----------|------------------|-----------|
| Source Type | ESI      | Ion Polarity          | Positive  | Set Nebulizer    | 0.3 Bar   |
| Focus       | Active   | Set Capillary         | 4500 V    | Set Dry Heater   | 180 °C    |
| Scan Begin  | 100 m/z  | Set End Plate Offset  | -500 V    | Set Dry Gas      | 4.0 l/min |
| Scan End    | 1000 m/z | Set Collision Cell RF | 600.0 Vpp | Set Divert Valve | Source    |

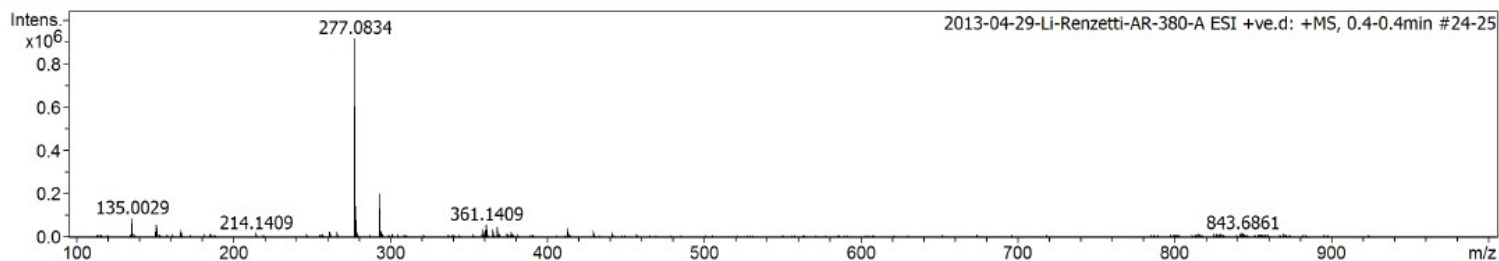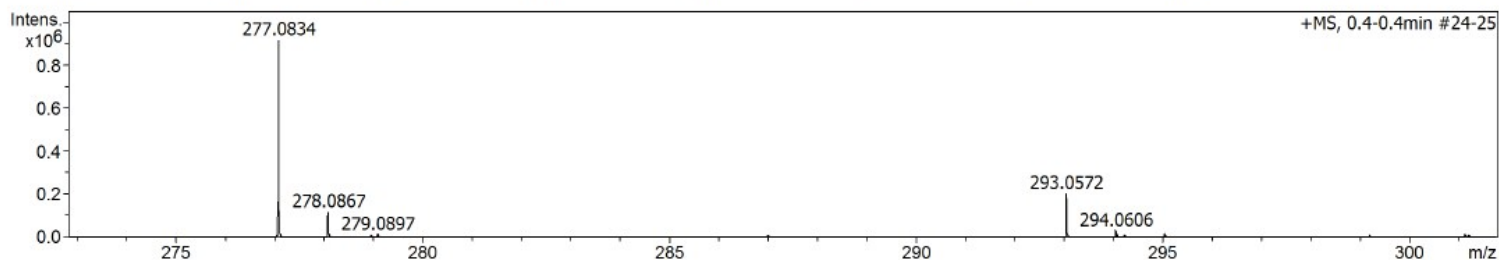

| Meas. m/z | # | Ion Formula | m/z      | err [ppm] | mSigma | # Sigma | Score  | rdb  | e <sup>-</sup> Conf | N-Rule |
|-----------|---|-------------|----------|-----------|--------|---------|--------|------|---------------------|--------|
| 277.0834  | 1 | C14H9N6O    | 277.0832 | -0.6      | 27.6   | 1       | 100.00 | 13.5 | even                | ok     |
|           | 1 | C16H14NaO3  | 277.0835 | 0.4       | 28.5   | 1       | 100.00 | 9.5  | even                | ok     |
|           | 1 | C13H18KO4   | 277.0837 | -1.0      | 40.3   | 1       | 100.00 | 4.5  | even                | ok     |
| 293.0572  | 1 | C17H5N6     | 293.0570 | -0.7      | 47.4   | 1       | 100.00 | 18.5 | even                | ok     |
|           | 1 | C19H10NaO2  | 293.0573 | -0.3      | 46.7   | 1       | 100.00 | 14.5 | even                | ok     |
|           | 1 | C16H14KO3   | 293.0575 | 0.8       | 25.1   | 1       | 100.00 | 9.5  | even                | ok     |

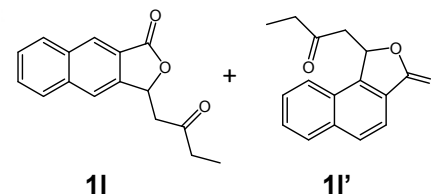



## Mass Spectrum SmartFormula Report

**Analysis Info**

Analysis Name: D:\Data\Li\2013-04-29-Li-Renzetti-AR-332-A-A-A ESI +ve.d  
 Method: Tune\_pos\_Low\_Na\_Formate\_100-1000.m  
 Sample Name: 2013-04-29-Li-Renzetti-AR-332-A-A-A ESI +ve  
 Comment:

Acquisition Date: 4/29/2013 3:26:25 PM  
 Operator: ADM  
 Instrument: maXis impact 282001.00044

**Acquisition Parameter**

|             |          |                       |           |                  |           |
|-------------|----------|-----------------------|-----------|------------------|-----------|
| Source Type | ESI      | Ion Polarity          | Positive  | Set Nebulizer    | 0.3 Bar   |
| Focus       | Active   | Set Capillary         | 4500 V    | Set Dry Heater   | 180 °C    |
| Scan Begin  | 100 m/z  | Set End Plate Offset  | -500 V    | Set Dry Gas      | 4.0 l/min |
| Scan End    | 1000 m/z | Set Collision Cell RF | 600.0 Vpp | Set Divert Valve | Source    |

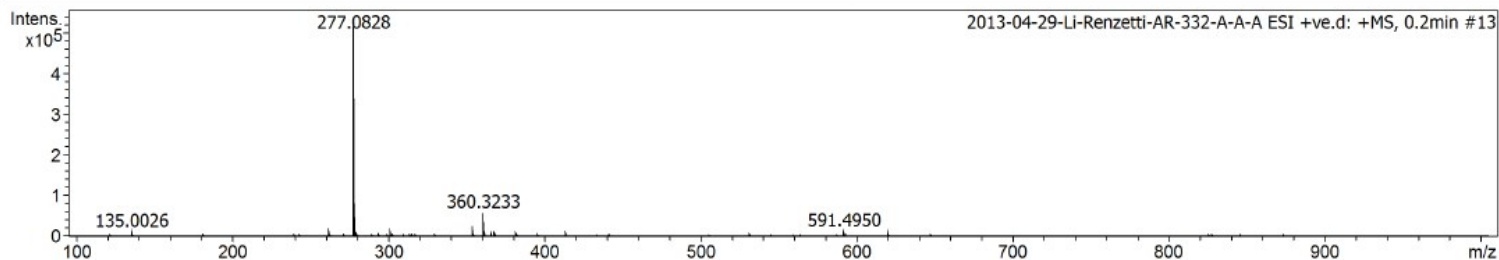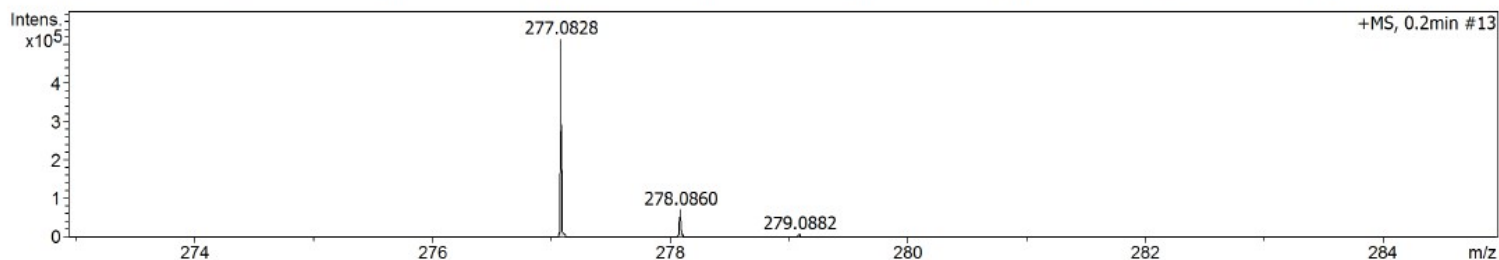

| Meas. m/z | # | Ion Formula | m/z      | err [ppm] | mSigma | # Sigma | Score  | rdb  | e <sup>-</sup> Conf | N-Rule |
|-----------|---|-------------|----------|-----------|--------|---------|--------|------|---------------------|--------|
| 277.0828  | 1 | C16H14NaO3  | 277.0835 | 2.7       | 23.3   | 1       | 100.00 | 9.5  | even                | ok     |
|           | 2 | CH10N12NaO4 | 277.0840 | 4.5       | 45.5   | 2       | 42.52  | 2.5  | even                | ok     |
|           | 3 | H14N8NaO8   | 277.0827 | -0.3      | 59.0   | 3       | 50.18  | -2.5 | even                | ok     |

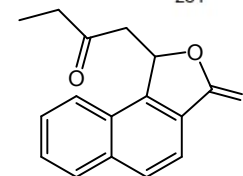

**11'**

## Mass Spectrum SmartFormula Report

### Analysis Info

Analysis Name D:\Data\Li\2012-12-17-Li-Renzetti AR-322-A +ve.d  
Method Tune\_pos\_low\_AW\_NaFormate\_cal.m  
Sample Name 2012-12-17-Li-Renzetti AR-322-A +ve  
Comment

Acquisition Date 12/18/2012 11:14:59 AM  
Operator ADM  
Instrument maXis impact 282001.00044

### Acquisition Parameter

|             |          |                       |           |                  |           |
|-------------|----------|-----------------------|-----------|------------------|-----------|
| Source Type | ESI      | Ion Polarity          | Positive  | Set Nebulizer    | 1.0 Bar   |
| Focus       | Active   | Set Capillary         | 3000 V    | Set Dry Heater   | 200 °C    |
| Scan Begin  | 50 m/z   | Set End Plate Offset  | -500 V    | Set Dry Gas      | 4.0 l/min |
| Scan End    | 3000 m/z | Set Collision Cell RF | 600.0 Vpp | Set Divert Valve | Source    |

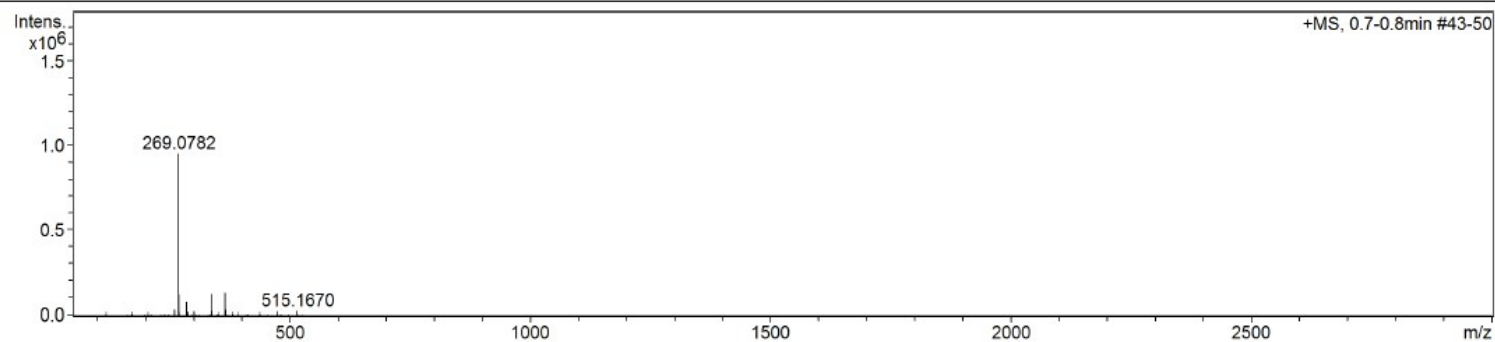

| Meas. m/z | # | Ion Formula                                      | m/z      | err [ppm] | mSigma | Score | rdb    | e <sup>-</sup> Conf | N-Rule |
|-----------|---|--------------------------------------------------|----------|-----------|--------|-------|--------|---------------------|--------|
| 269.0782  | 1 | C <sub>14</sub> H <sub>14</sub> NaO <sub>4</sub> | 269.0784 | 0.9       | 18.7   | 1     | 100.00 | 7.5 even            | ok     |

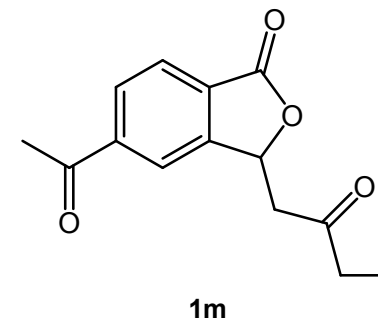

## Mass Spectrum SmartFormula Report

### Analysis Info

Analysis Name D:\Data\Li\2013-04-29-Li-Renzetti-AR-400-A-A ESI +ve.d  
 Method Tune\_pos\_Low\_Na\_Formate\_100-1000.m  
 Sample Name 2013-04-29-Li-Renzetti-AR-400-A-A ESI +ve  
 Comment

Acquisition Date 4/29/2013 2:20:36 PM  
 Operator ADM  
 Instrument maXis impact 282001.00044

### Acquisition Parameter

|             |          |                       |           |                  |           |
|-------------|----------|-----------------------|-----------|------------------|-----------|
| Source Type | ESI      | Ion Polarity          | Positive  | Set Nebulizer    | 0.3 Bar   |
| Focus       | Active   | Set Capillary         | 4500 V    | Set Dry Heater   | 180 °C    |
| Scan Begin  | 100 m/z  | Set End Plate Offset  | -500 V    | Set Dry Gas      | 4.0 l/min |
| Scan End    | 1000 m/z | Set Collision Cell RF | 600.0 Vpp | Set Divert Valve | Source    |

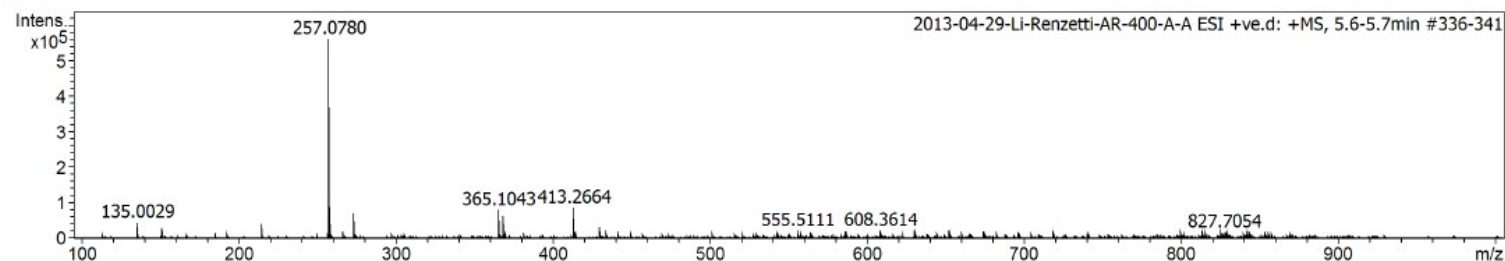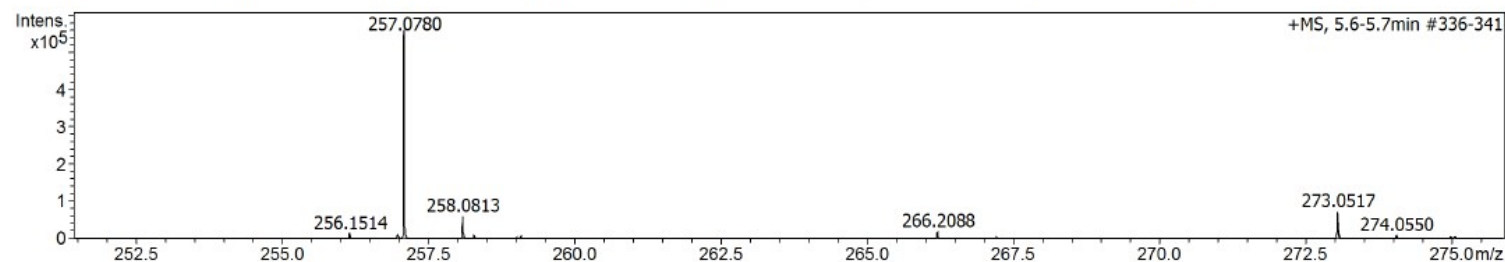

| Meas. m/z | # | Ion Formula | m/z      | err [ppm] | mSigma | # Sigma | Score  | rdb | e <sup>-</sup> Conf | N-Rule |
|-----------|---|-------------|----------|-----------|--------|---------|--------|-----|---------------------|--------|
| 257.0780  | 1 | C13H14NaO4  | 257.0784 | -1.7      | 22.9   | 1       | 100.00 | 6.5 | even                | ok     |
| 273.0517  | 1 | C11H12KN3O3 | 273.0510 | -2.4      | 15.5   | 1       | 100.00 | 7.0 | odd                 | ok     |
|           | 2 | C13H14KO4   | 273.0524 | 2.5       | 21.2   | 2       | 87.67  | 6.5 | even                | ok     |

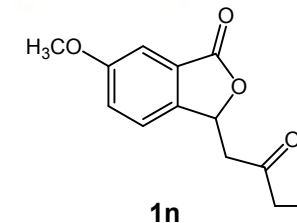

## Mass Spectrum SmartFormula Report

### Analysis Info

Analysis Name D:\Data\Li\2013-04-29-Li-Renzetti-AR-400-A-B ESI +ve.d  
 Method Tune\_pos\_Low\_Na\_Formate\_100-1000.m  
 Sample Name 2013-04-29-Li-Renzetti-AR-400-A-B ESI +ve  
 Comment

Acquisition Date 4/29/2013 4:43:24 PM  
 Operator ADM  
 Instrument maXis impact 282001.00044

### Acquisition Parameter

|             |          |                       |           |                  |           |
|-------------|----------|-----------------------|-----------|------------------|-----------|
| Source Type | ESI      | Ion Polarity          | Positive  | Set Nebulizer    | 0.3 Bar   |
| Focus       | Active   | Set Capillary         | 4500 V    | Set Dry Heater   | 180 °C    |
| Scan Begin  | 100 m/z  | Set End Plate Offset  | -500 V    | Set Dry Gas      | 4.0 l/min |
| Scan End    | 1000 m/z | Set Collision Cell RF | 600.0 Vpp | Set Divert Valve | Source    |

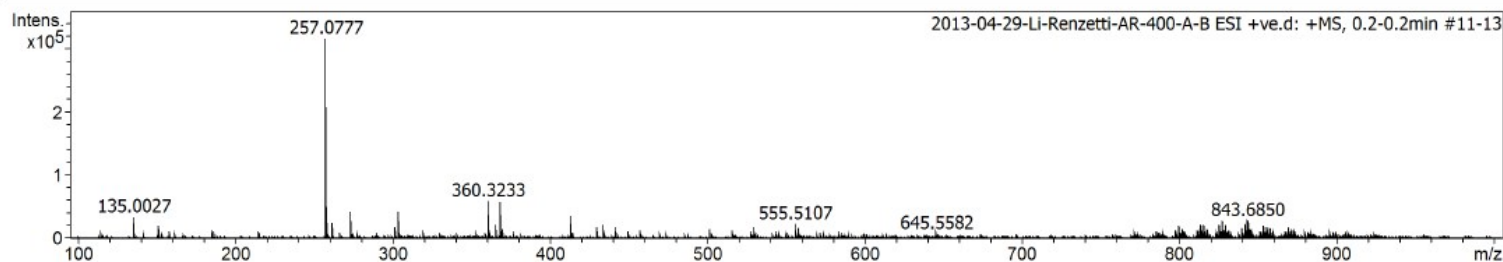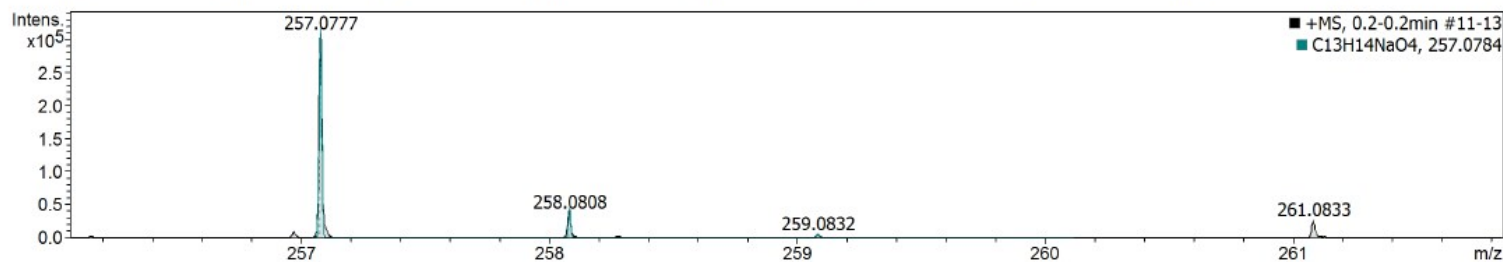

| Meas. m/z | # | Ion Formula | m/z      | err [ppm] | mSigma | # Sigma | Score  | rdb | e <sup>-</sup> Conf | N-Rule |
|-----------|---|-------------|----------|-----------|--------|---------|--------|-----|---------------------|--------|
| 257.0777  | 1 | C13H14NaO4  | 257.0784 | 3.0       | 16.4   | 1       | 100.00 | 6.5 | even                | ok     |

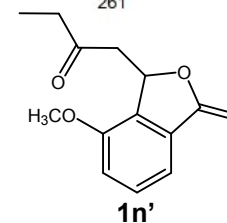

120619-11ESIHR-Li-Andrea-AR-39-D-Bis-B

6/19/2012 1:40:16 PM

120619-11ESIHR-Li-Andrea-AR-39-D-Bis-B #215-228 RT: 0.75-0.80 AV: 14 NL: 2.82E7  
T: FTMS + p ESI Full ms [100.00-1000.00]

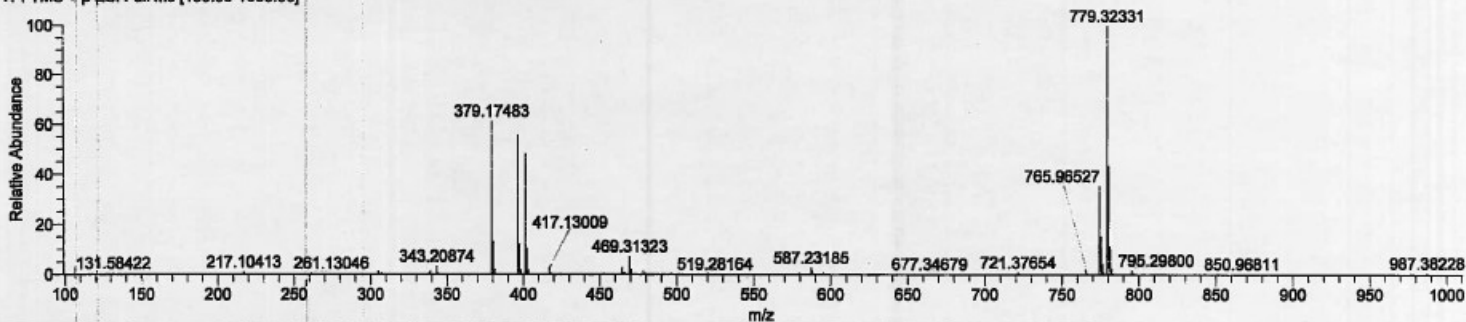

120619-11ESIHR-Li-Andrea-AR-39-D-Bis-B #215-228 RT: 0.75-0.80 AV: 14 NL: 1.73E7  
T: FTMS + p ESI Full ms [100.00-1000.00]

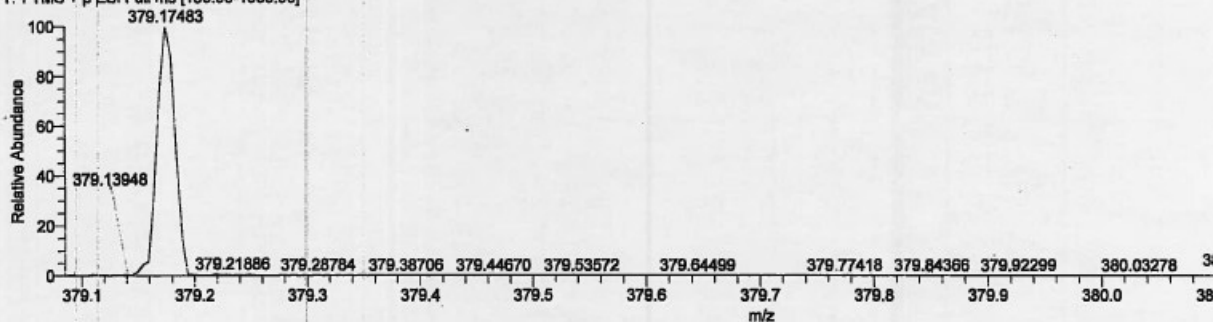

120619-11ESIHR-Li-Andrea-AR-39-D-Bis-B#215-228 RT: 0.75-0.80 AV: 14

T: FTMS + p ESI Full ms [100.00-1000.00]

m/z= 379.15152-379.19472

| m/z       | Intensity  | Relative | Resolution | Charge | Theo. Mass | Delta (ppm) | RDB equiv. | Composit:                                                     |
|-----------|------------|----------|------------|--------|------------|-------------|------------|---------------------------------------------------------------|
| 379.17483 | 17365958.0 | 100.00   | 21444.06   | 1.00   | 379.17513  | -0.30       | 7.5        | C <sub>20</sub> H <sub>27</sub> O <sub>7</sub>                |
|           |            |          |            |        | 379.17379  | 1.05        | 8.0        | C <sub>18</sub> H <sub>25</sub> O <sub>6</sub> N <sub>3</sub> |
|           |            |          |            |        | 379.17647  | -1.63       | 12.5       | C <sub>21</sub> H <sub>23</sub> O <sub>3</sub> N <sub>4</sub> |
|           |            |          |            |        | 379.17781  | -2.98       | 12.0       | C <sub>23</sub> H <sub>25</sub> O <sub>4</sub> N              |
|           |            |          |            |        | 379.17915  | -4.31       | 17.0       | C <sub>24</sub> H <sub>21</sub> N <sub>5</sub>                |

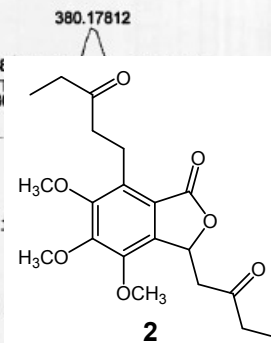

## Mass Spectrum SmartFormula Report

### Analysis Info

Analysis Name: D:\Data\Li\2013-04-29-Li-Renzetti-AR-406-D-A ESI +ve.d  
 Method: Tune\_pos\_Low\_Na\_Formate\_100-1000.m  
 Sample Name: 2013-04-29-Li-Renzetti-AR-406-D-A ESI +ve  
 Comment:

Acquisition Date: 4/29/2013 5:13:32 PM  
 Operator: ADM  
 Instrument: maXis impact 282001.00044

### Acquisition Parameter

|             |          |                       |           |                  |           |
|-------------|----------|-----------------------|-----------|------------------|-----------|
| Source Type | ESI      | Ion Polarity          | Positive  | Set Nebulizer    | 0.3 Bar   |
| Focus       | Active   | Set Capillary         | 4500 V    | Set Dry Heater   | 180 °C    |
| Scan Begin  | 100 m/z  | Set End Plate Offset  | -500 V    | Set Dry Gas      | 4.0 l/min |
| Scan End    | 1000 m/z | Set Collision Cell RF | 600.0 Vpp | Set Divert Valve | Source    |

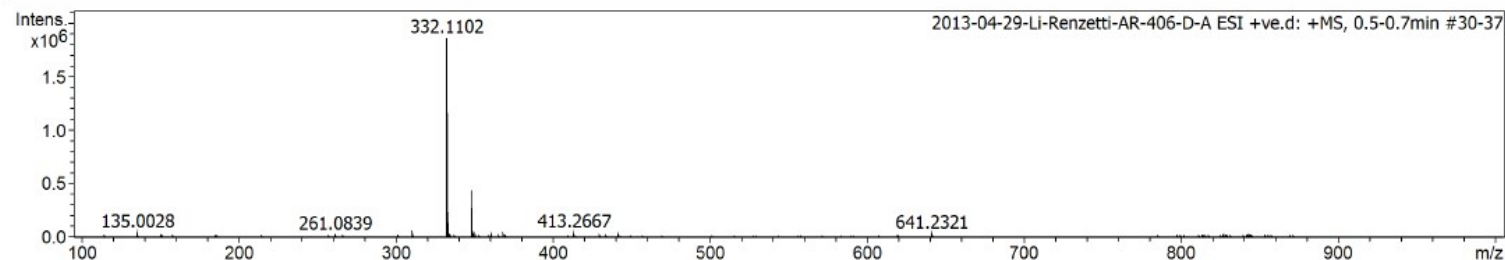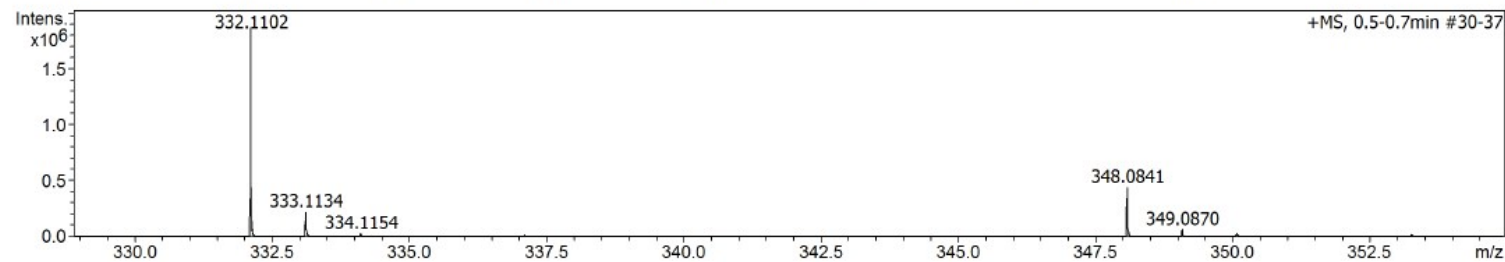

| Meas. m/z | # | Ion Formula | m/z      | err [ppm] | mSigma | # Sigma | Score  | rdb  | e <sup>-</sup> Conf | N-Rule |
|-----------|---|-------------|----------|-----------|--------|---------|--------|------|---------------------|--------|
| 332.1102  | 1 | C13H14N7O4  | 332.1102 | -0.0      | 30.3   | 1       | 100.00 | 10.5 | even                | ok     |
|           | 1 | C15H19NNaO6 | 332.1105 | 0.8       | 31.3   | 1       | 100.00 | 6.5  | even                | ok     |
| 348.0841  | 1 | C16H10N7O3  | 348.0840 | 0.3       | 47.2   | 1       | 100.00 | 15.5 | even                | ok     |
|           | 1 | C18H15NNaO5 | 348.0842 | -0.5      | 46.5   | 1       | 100.00 | 11.5 | even                | ok     |
|           | 1 | C15H19KNO6  | 348.0844 | 0.9       | 25.7   | 1       | 100.00 | 6.5  | even                | ok     |

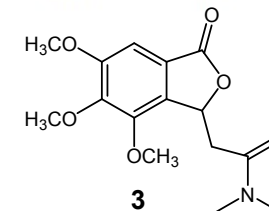



130912-06HRESI-Li-Andrea-AR-352A

9/12/2013 12:23:06 PM

130912-06HRESI-Li-Andrea-AR-352A #282-295 RT: 0.65-0.69 AV: 14 NL: 2.15E8  
T: FTMS + p ESI Full ms [150.00-1000.00]

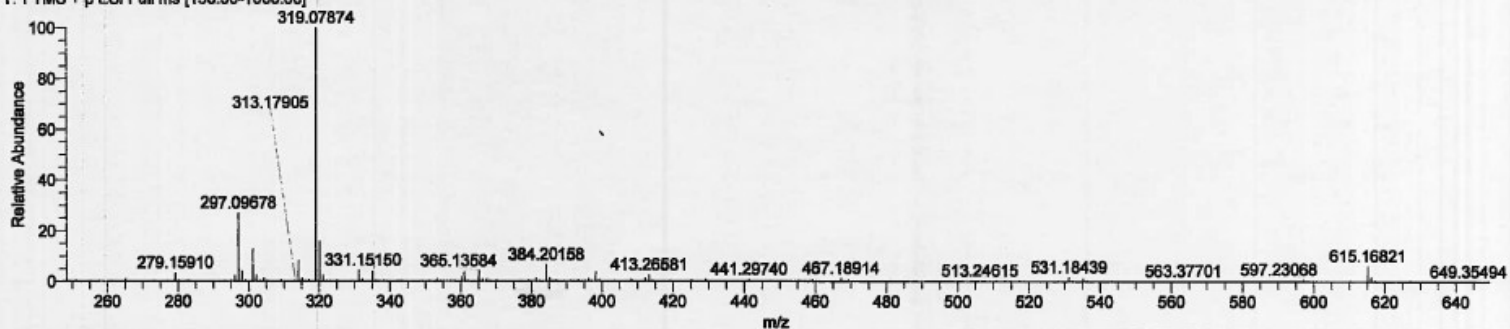

130912-06HRESI-Li-Andrea-AR-352A #282-295 RT: 0.65-0.69 AV: 14 NL: 5.80E7  
T: FTMS + p ESI Full ms [150.00-1000.00]

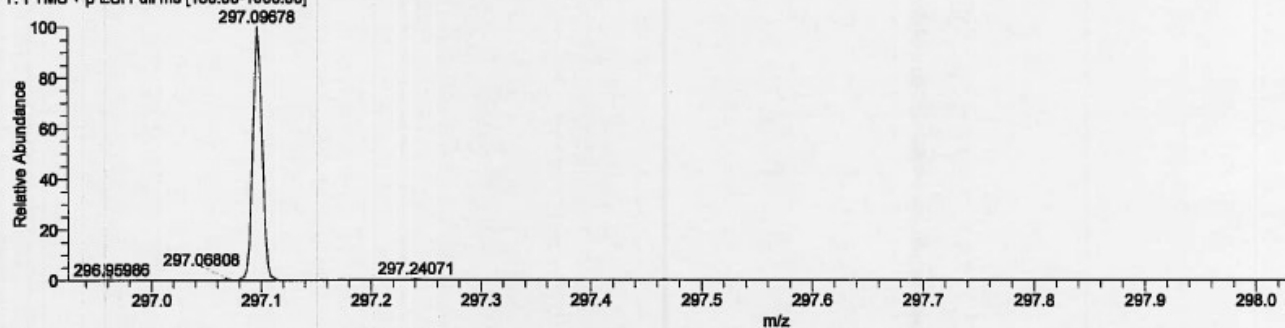

130912-06HRESI-Li-Andrea-AR-352A #282-295 RT: 0.65-0.69 AV: 14  
T: FTMS + p ESI Full ms [150.00-1000.00]  
m/z= 297.08533-297.10026

| m/z       | Intensity  | Relative | Resolution | Charge | Theo. Mass | Delta (ppm) | RDB equiv. |
|-----------|------------|----------|------------|--------|------------|-------------|------------|
| 297.09678 | 58123612.0 | 100.00   | 32277.95   | 1.00   | 297.09688  | -0.33       | 6.5 C1     |
|           |            |          |            |        | 297.09581  | 3.26        | 8.5 C1     |
|           |            |          |            |        | 297.09822  | -4.83       | 11.5 C1    |

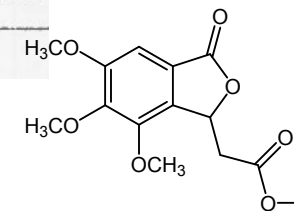

4a

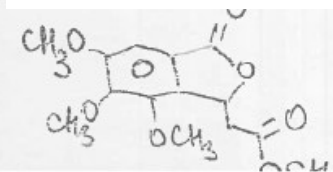

## Mass Spectrum SmartFormula Report

### Analysis Info

Analysis Name D:\Data\Li\2013-04-29-Li-Renzetti-AR-352-B-B ESI +ve.d  
 Method Tune\_pos\_Low\_Na\_Formate\_100-1000.m  
 Sample Name 2013-04-29-Li-Renzetti-AR-352-B-B ESI +ve  
 Comment

Acquisition Date 4/29/2013 5:56:26 PM  
 Operator ADM  
 Instrument maXis impact 282001.00044

### Acquisition Parameter

|             |          |                       |           |                  |           |
|-------------|----------|-----------------------|-----------|------------------|-----------|
| Source Type | ESI      | Ion Polarity          | Positive  | Set Nebulizer    | 0.3 Bar   |
| Focus       | Active   | Set Capillary         | 4500 V    | Set Dry Heater   | 180 °C    |
| Scan Begin  | 100 m/z  | Set End Plate Offset  | -500 V    | Set Dry Gas      | 4.0 l/min |
| Scan End    | 1000 m/z | Set Collision Cell RF | 600.0 Vpp | Set Divert Valve | Source    |

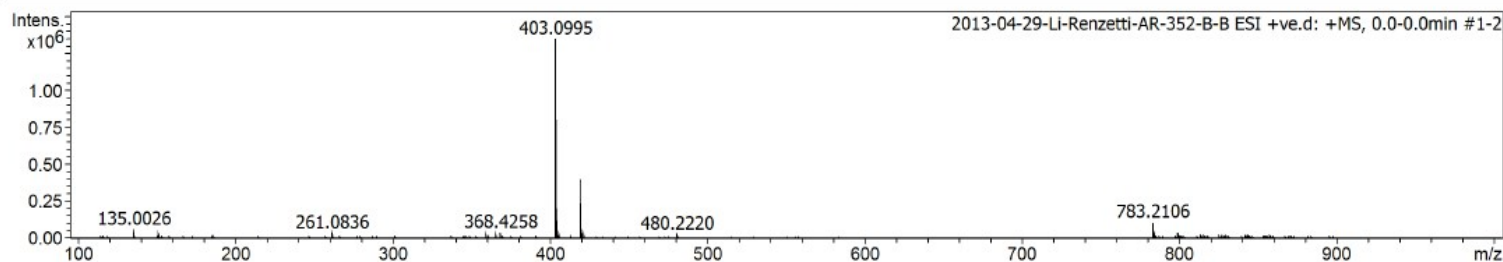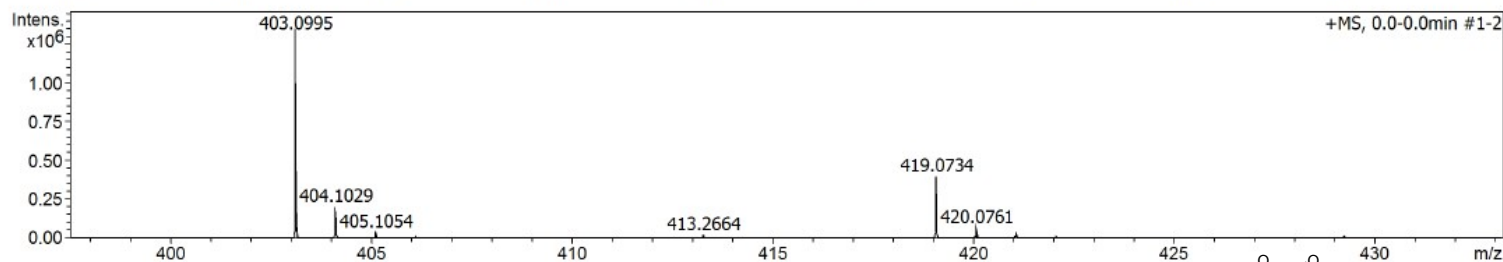

| Meas. m/z | # | Ion Formula | m/z      | err [ppm] | mSigma | # Sigma | Score  | rdB | e <sup>-</sup> Conf | N-Rule |
|-----------|---|-------------|----------|-----------|--------|---------|--------|-----|---------------------|--------|
| 403.0995  | 1 | C18H20NaO9  | 403.1000 | 1.0       | 27.4   | 1       | 100.00 | 8.5 | even                | ok     |
| 419.0734  | 1 | C18H20KO9   | 419.0739 | -1.1      | 26.7   | 1       | 100.00 | 8.5 | even                | ok     |

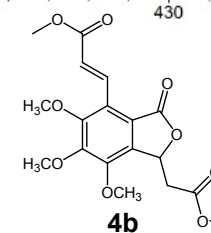



## Mass Spectrum SmartFormula Report

### Analysis Info

Analysis Name: D:\Data\Li\2013-04-29-Li-Renzetti-AR-407-A-A ESI +ve.d  
 Method: Tune\_pos\_Low\_Na\_Formate\_100-1000.m  
 Sample Name: 2013-04-29-Li-Renzetti-AR-407-A-A ESI +ve  
 Comment:

Acquisition Date: 4/29/2013 5:49:43 PM  
 Operator: ADM  
 Instrument: maXis impact 282001.00044

### Acquisition Parameter

|             |          |                       |           |                  |           |
|-------------|----------|-----------------------|-----------|------------------|-----------|
| Source Type | ESI      | Ion Polarity          | Positive  | Set Nebulizer    | 0.3 Bar   |
| Focus       | Active   | Set Capillary         | 4500 V    | Set Dry Heater   | 180 °C    |
| Scan Begin  | 100 m/z  | Set End Plate Offset  | -500 V    | Set Dry Gas      | 4.0 l/min |
| Scan End    | 1000 m/z | Set Collision Cell RF | 600.0 Vpp | Set Divert Valve | Source    |

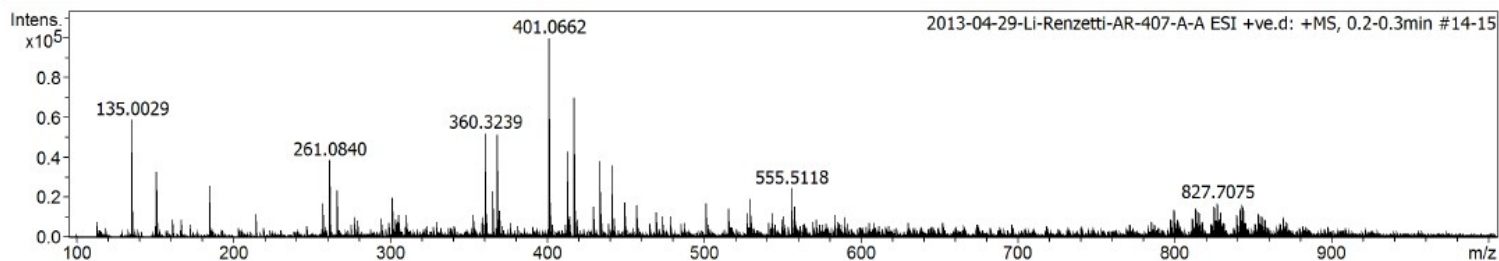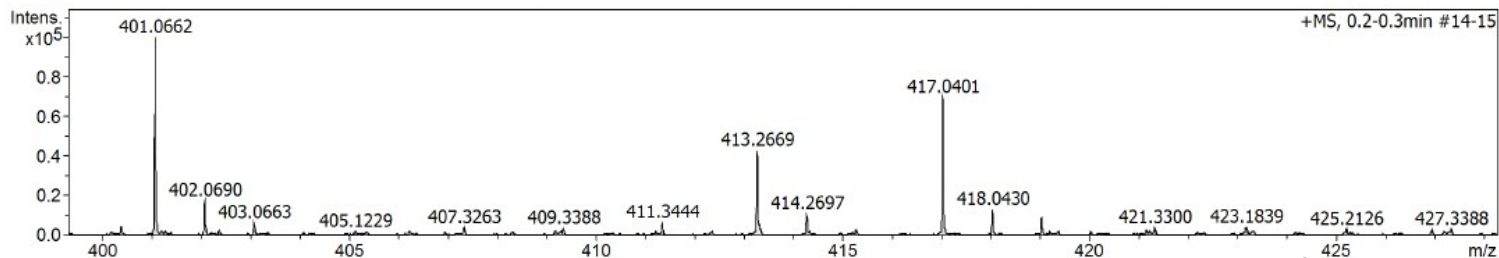

| Meas. m/z | # | Ion Formula | m/z      | err [ppm] | mSigma | # Sigma | Score  | rdb | e <sup>-</sup> Conf | N-Rule |
|-----------|---|-------------|----------|-----------|--------|---------|--------|-----|---------------------|--------|
| 401.0662  | 1 | C18H18NaO7S | 401.0665 | 0.9       | 19.5   | 1       | 100.00 | 9.5 | even                | ok     |
| 417.0401  | 1 | C18H18KO7S  | 417.0405 | 1.0       | 16.2   | 1       | 100.00 | 9.5 | even                | ok     |

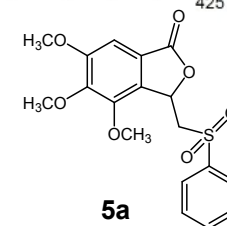

## Mass Spectrum SmartFormula Report

### Analysis Info

Analysis Name: D:\Data\Li\2013-04-29-Li-Renzetti-AR-407-A-B ESI +ve.d  
 Method: Tune\_pos\_Low\_Na\_Formate\_100-1000.m  
 Sample Name: 2013-04-29-Li-Renzetti-AR-407-A-B ESI +ve  
 Comment:

Acquisition Date: 4/29/2013 5:41:22 PM  
 Operator: ADM  
 Instrument: maXis impact 282001.00044

### Acquisition Parameter

|             |          |                       |           |                  |           |
|-------------|----------|-----------------------|-----------|------------------|-----------|
| Source Type | ESI      | Ion Polarity          | Positive  | Set Nebulizer    | 0.3 Bar   |
| Focus       | Active   | Set Capillary         | 4500 V    | Set Dry Heater   | 180 °C    |
| Scan Begin  | 100 m/z  | Set End Plate Offset  | -500 V    | Set Dry Gas      | 4.0 l/min |
| Scan End    | 1000 m/z | Set Collision Cell RF | 600.0 Vpp | Set Divert Valve | Source    |

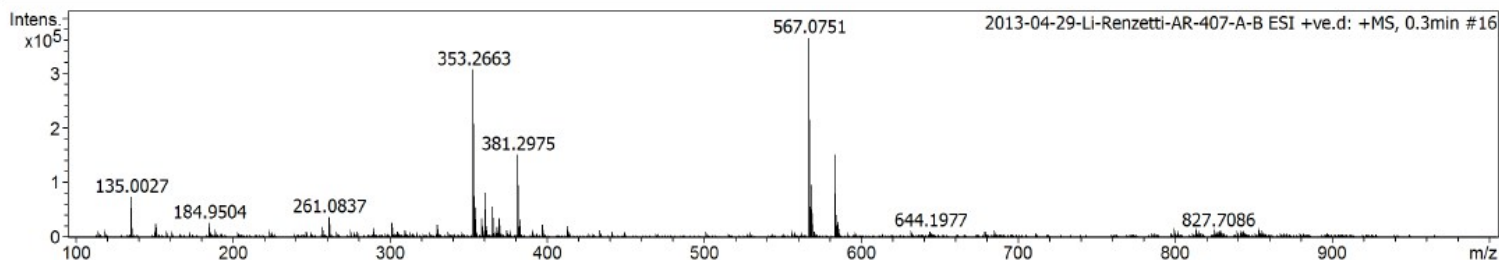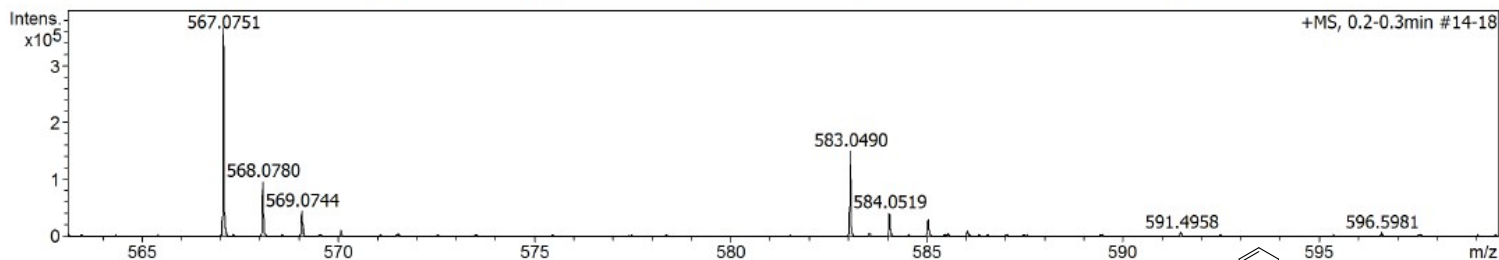

| Meas. m/z | # | Ion Formula     | m/z      | err [ppm] | mSigma | # Sigma | Score  | rdB  | e <sup>-</sup> Conf | N-Rule |
|-----------|---|-----------------|----------|-----------|--------|---------|--------|------|---------------------|--------|
| 567.0751  | 1 | C26H24NaO9S2    | 567.0754 | 0.6       | 24.4   | 1       | 100.00 | 14.5 | even                | ok     |
|           | 2 | C18H28N2NaO11S3 | 567.0747 | 0.6       | 31.6   | 2       | 83.69  | 5.5  | even                | ok     |
|           | 3 | C14H28N2NaO16S2 | 567.0772 | 3.8       | 35.6   | 3       | 24.32  | 1.5  | even                | ok     |
| 583.0490  | 1 | C21H24N2NaO10S3 | 583.0485 | -0.7      | 3.8    | 1       | 100.00 | 10.5 | even                | ok     |
|           | 1 | C26H24KO9S2     | 583.0493 | 0.6       | 20.4   | 1       | 100.00 | 14.5 | even                | ok     |
|           | 2 | C18H28KN2O11S3  | 583.0487 | -0.5      | 31.7   | 2       | 80.62  | 5.5  | even                | ok     |

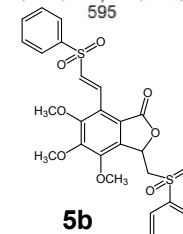

## Mass Spectrum SmartFormula Report

### Analysis Info

Analysis Name: D:\Data\Li\2013-04-29-Li-Renzetti-AR-354-CR ESI +ve.d  
 Method: Tune\_pos\_Low\_Na\_Formate\_100-1000.m  
 Sample Name: 2013-04-29-Li-Renzetti-AR-354-CR ESI +ve  
 Comment:

Acquisition Date: 4/29/2013 5:33:22 PM  
 Operator: ADM  
 Instrument: maXis impact 282001.00044

### Acquisition Parameter

|             |          |                       |           |                  |           |
|-------------|----------|-----------------------|-----------|------------------|-----------|
| Source Type | ESI      | Ion Polarity          | Positive  | Set Nebulizer    | 0.3 Bar   |
| Focus       | Active   | Set Capillary         | 4500 V    | Set Dry Heater   | 180 °C    |
| Scan Begin  | 100 m/z  | Set End Plate Offset  | -500 V    | Set Dry Gas      | 4.0 l/min |
| Scan End    | 1000 m/z | Set Collision Cell RF | 600.0 Vpp | Set Divert Valve | Source    |

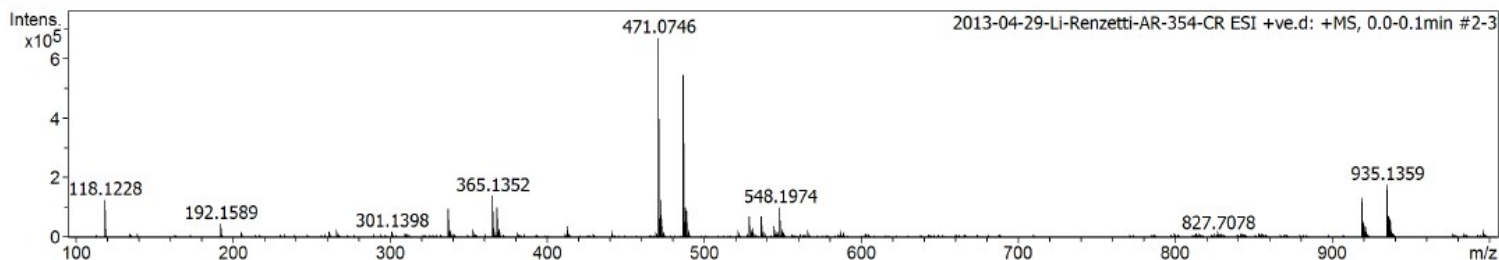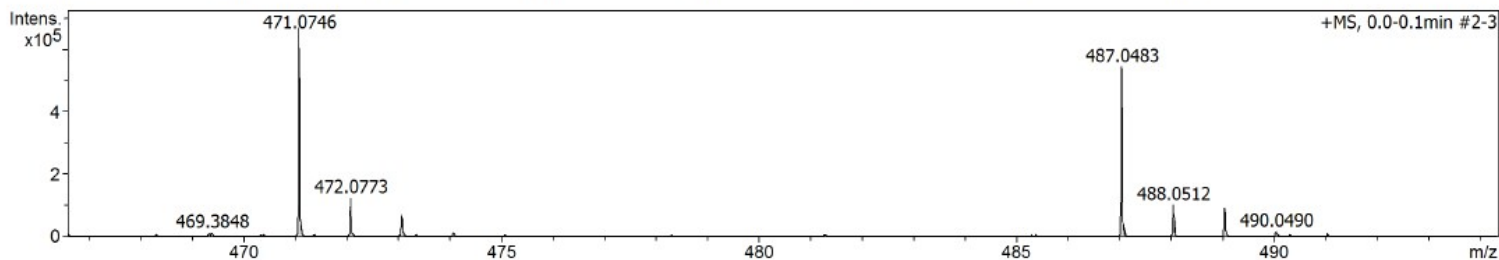

| Meas. m/z | # | Ion Formula     | m/z      | err [ppm] | mSigma | # Sigma | Score  | rdb | e <sup>-</sup> Conf | N-Rule |
|-----------|---|-----------------|----------|-----------|--------|---------|--------|-----|---------------------|--------|
| 471.0746  | 1 | C18H24NaO9S2    | 471.0754 | -1.6      | 22.7   | 1       | 100.00 | 6.5 | even                | ok     |
| 487.0483  | 1 | C13H24N2NaO10S3 | 487.0485 | -0.5      | 3.6    | 1       | 100.00 | 2.5 | even                | ok     |

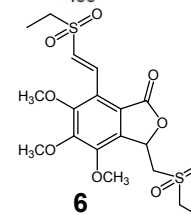

Supplement: c6ra07671h1.pdf [file c6ra07671h1.pdf]
